# Supplementary material
Source: ML conference proceedings conference paper supplement (https://openreview.net/forum?id=9tKC0YM8sX)
Supplement: supplementary_material [file attachment]

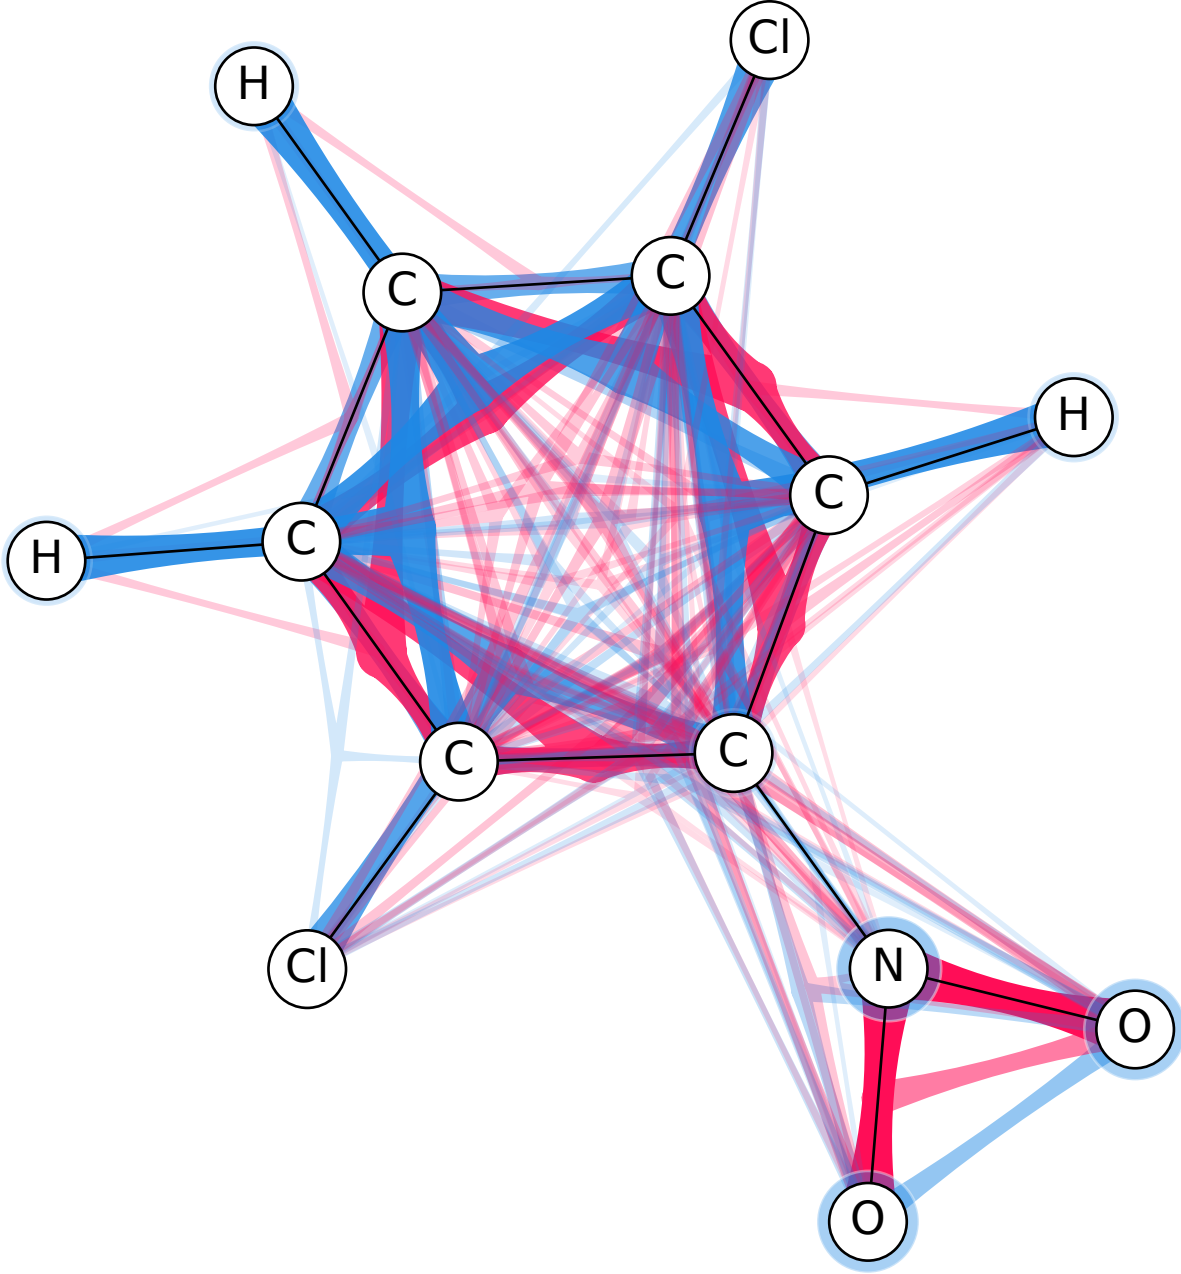

**linear readout**  
(top 100 MIs)

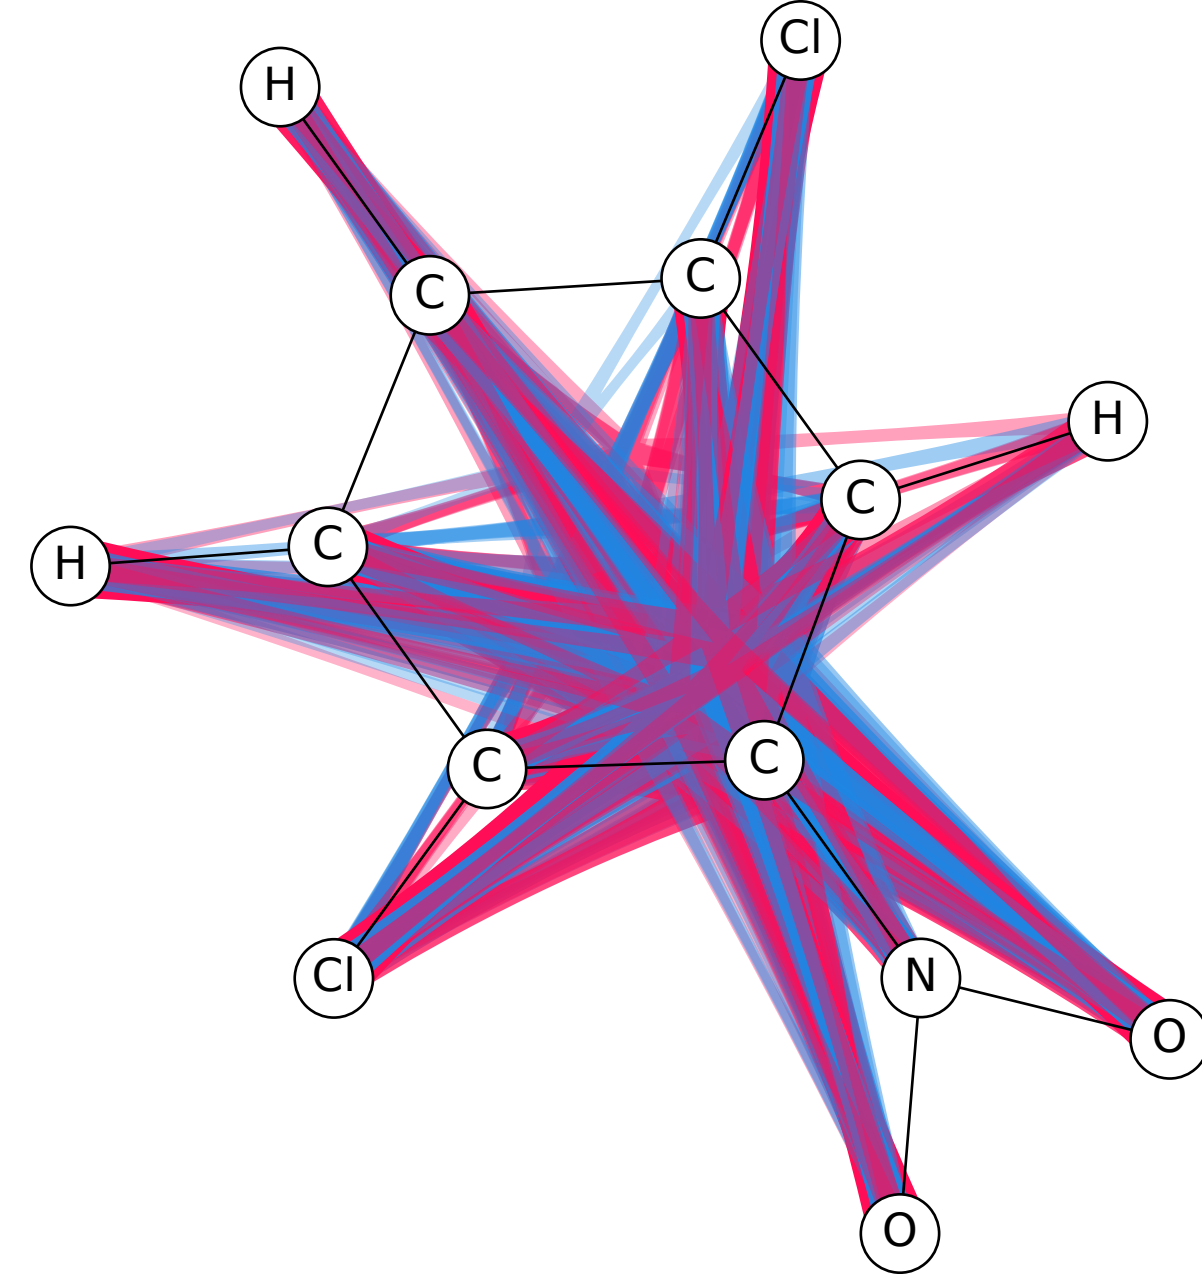

**deep readout**  
(top 100 MIs)

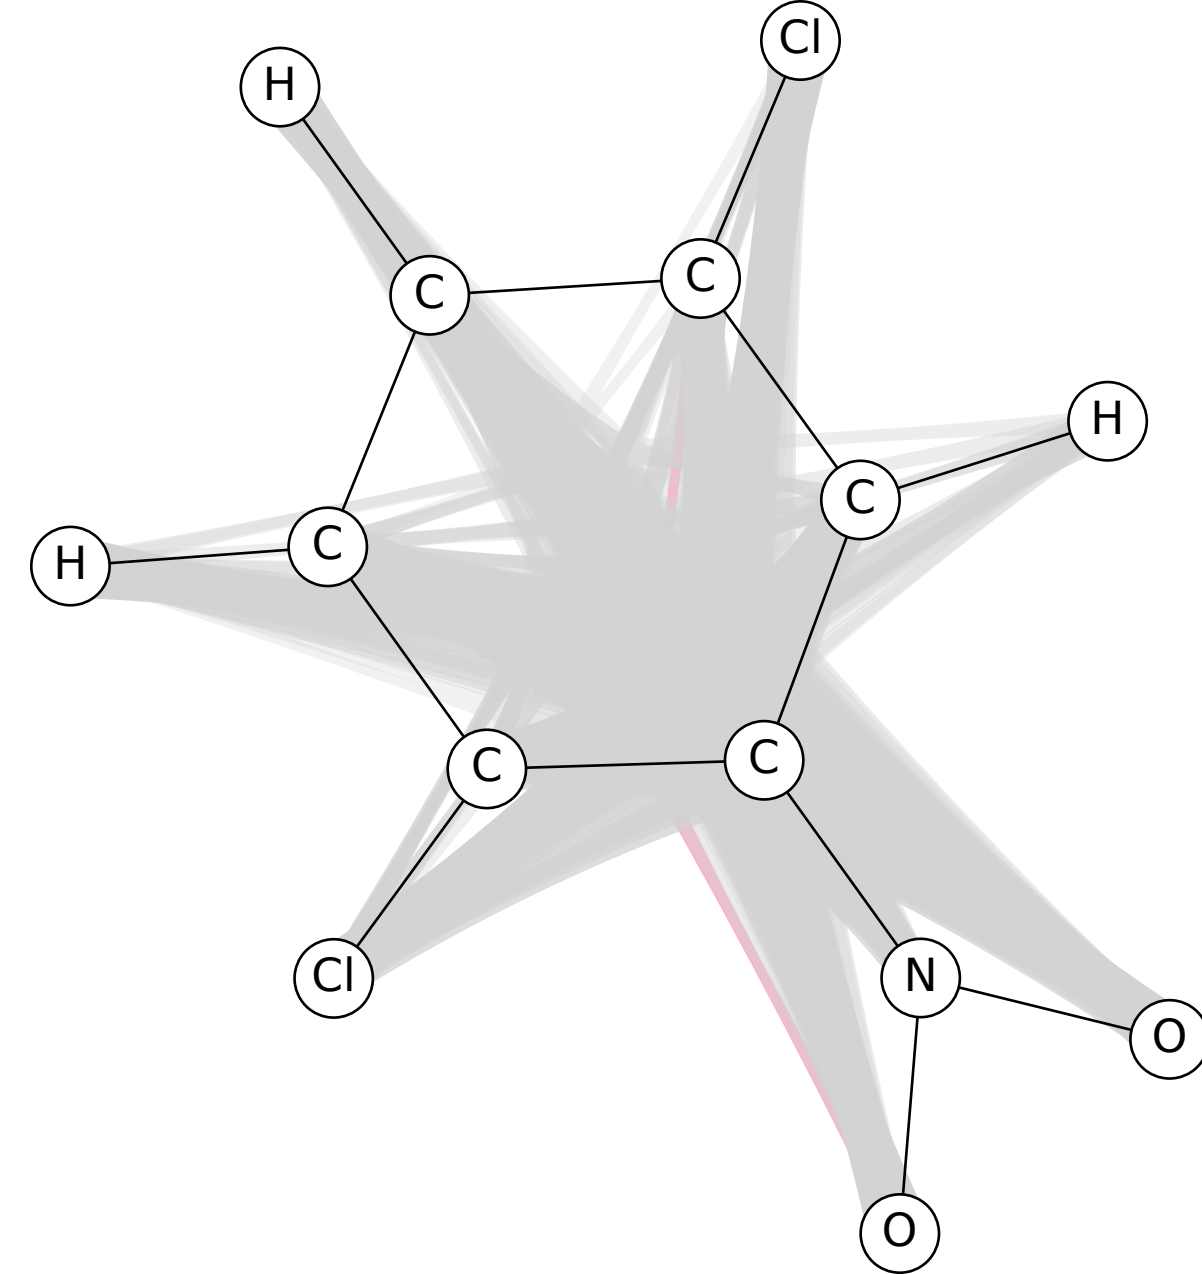

**deep readout**  
(top 100 MIs; recolored)

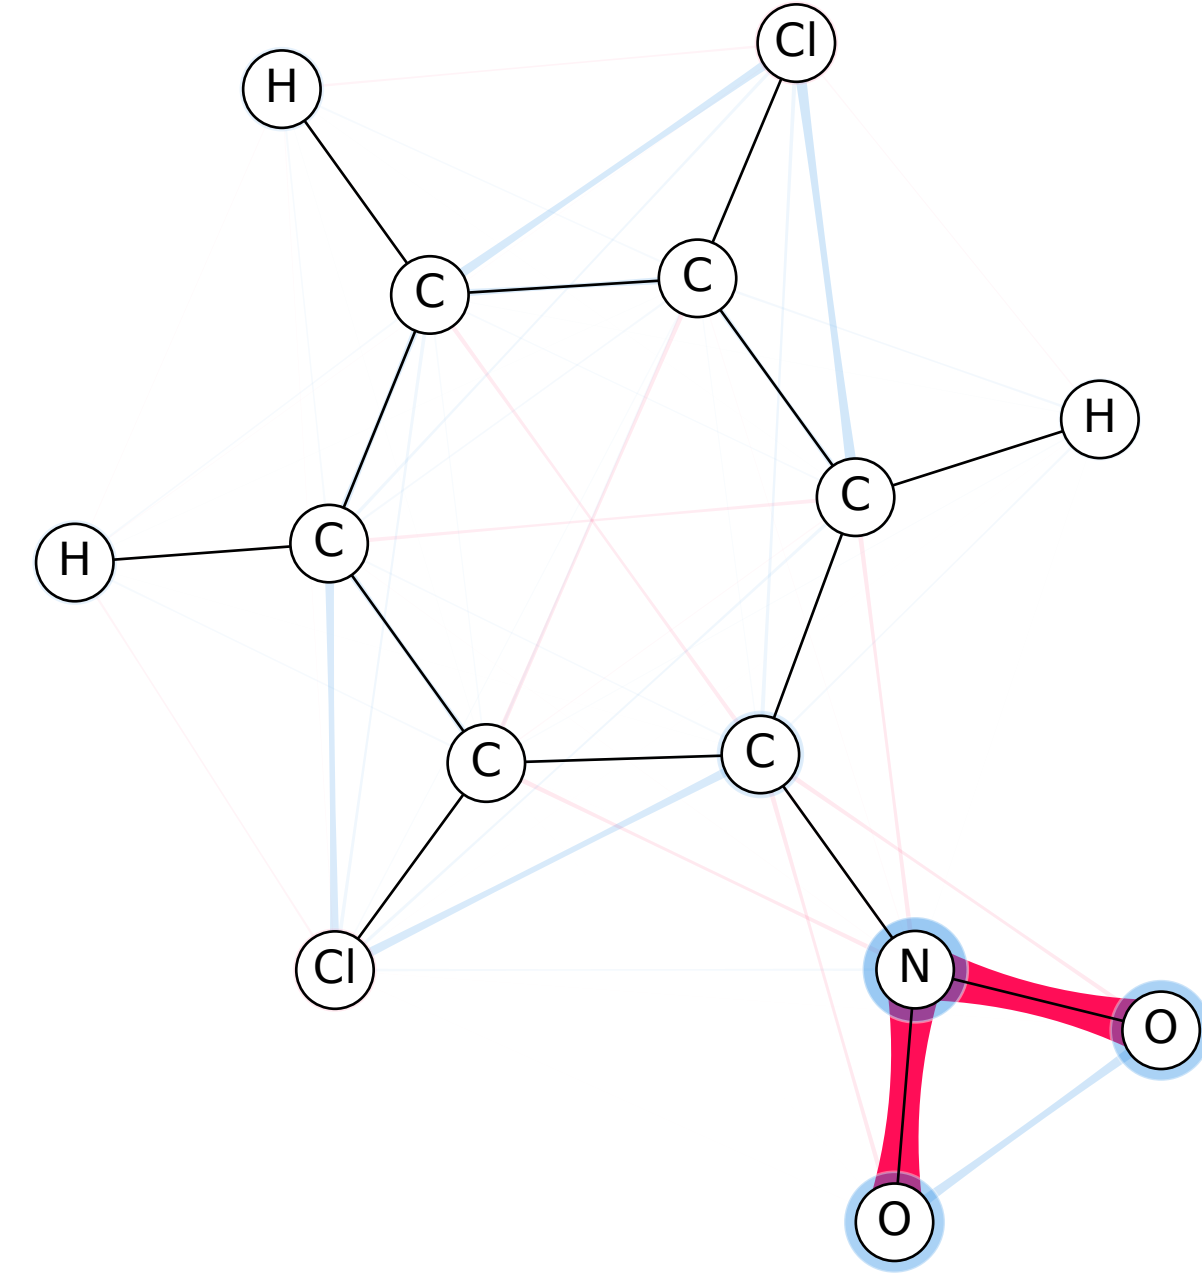

**linear readout**  
(all 2-SIIs)

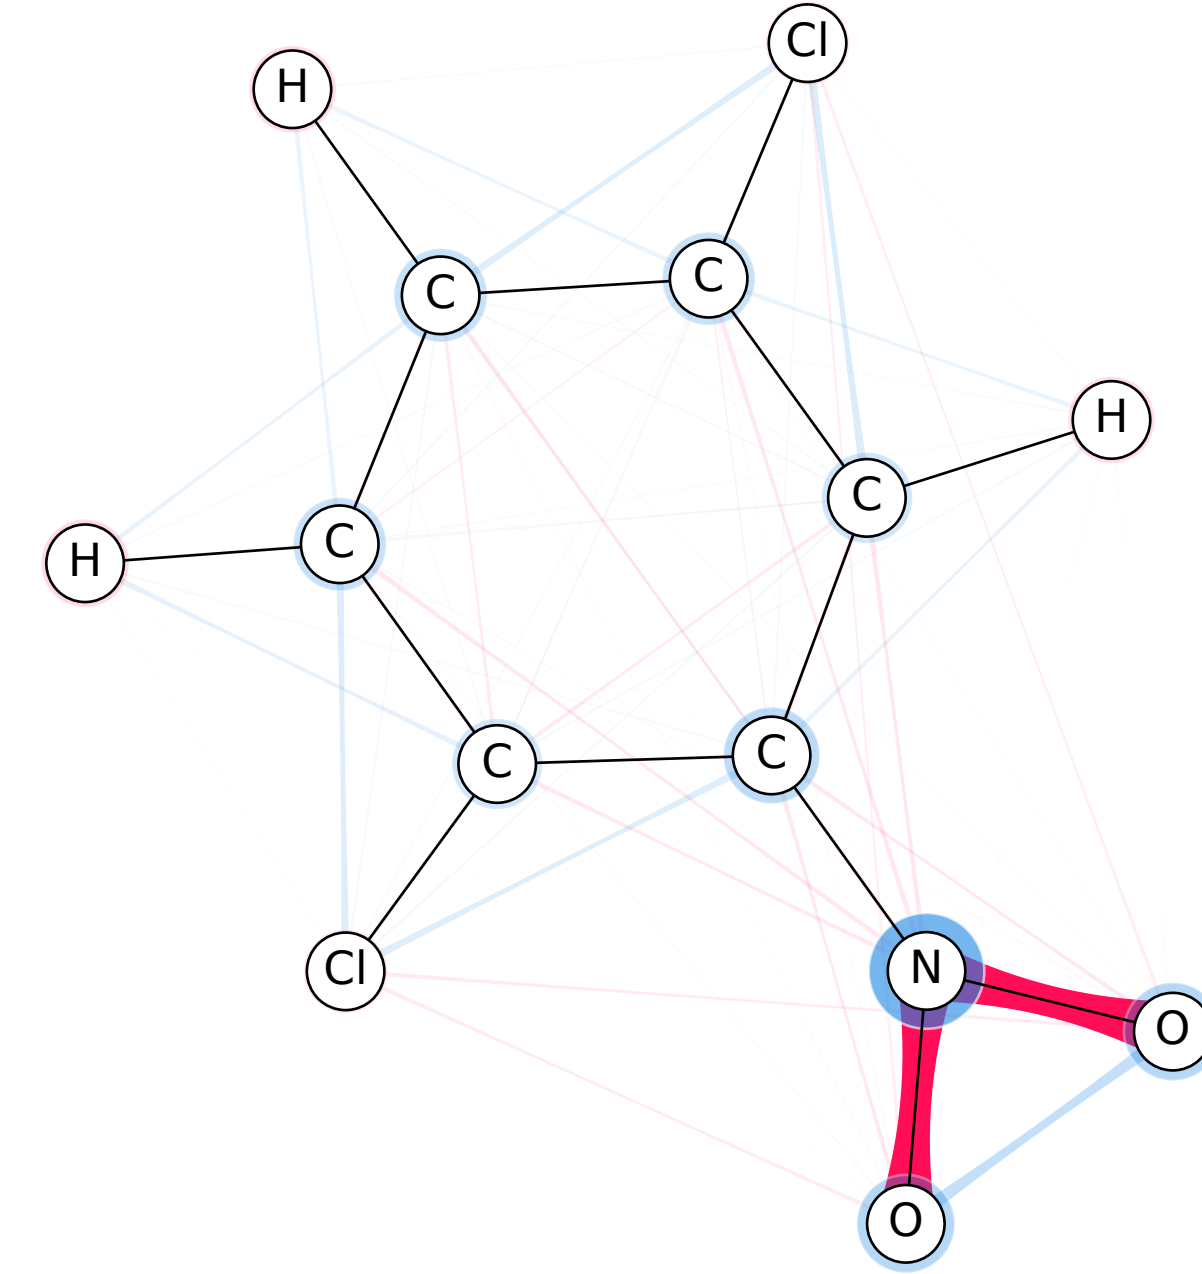

**deep readout**  
(all 2-SIIs)
