# Supplementary material
Source: ML conference proceedings conference paper supplement (https://openreview.net/forum?id=9tKC0YM8sX)

## 2-STII Explanation

Model: GAT, Dataset: Benzene, Layers: 3, Data ID: Pyridine, Label 0  
Predicted and Explained Class 0 ( $p = 0.99$ , logits. = 2.18)

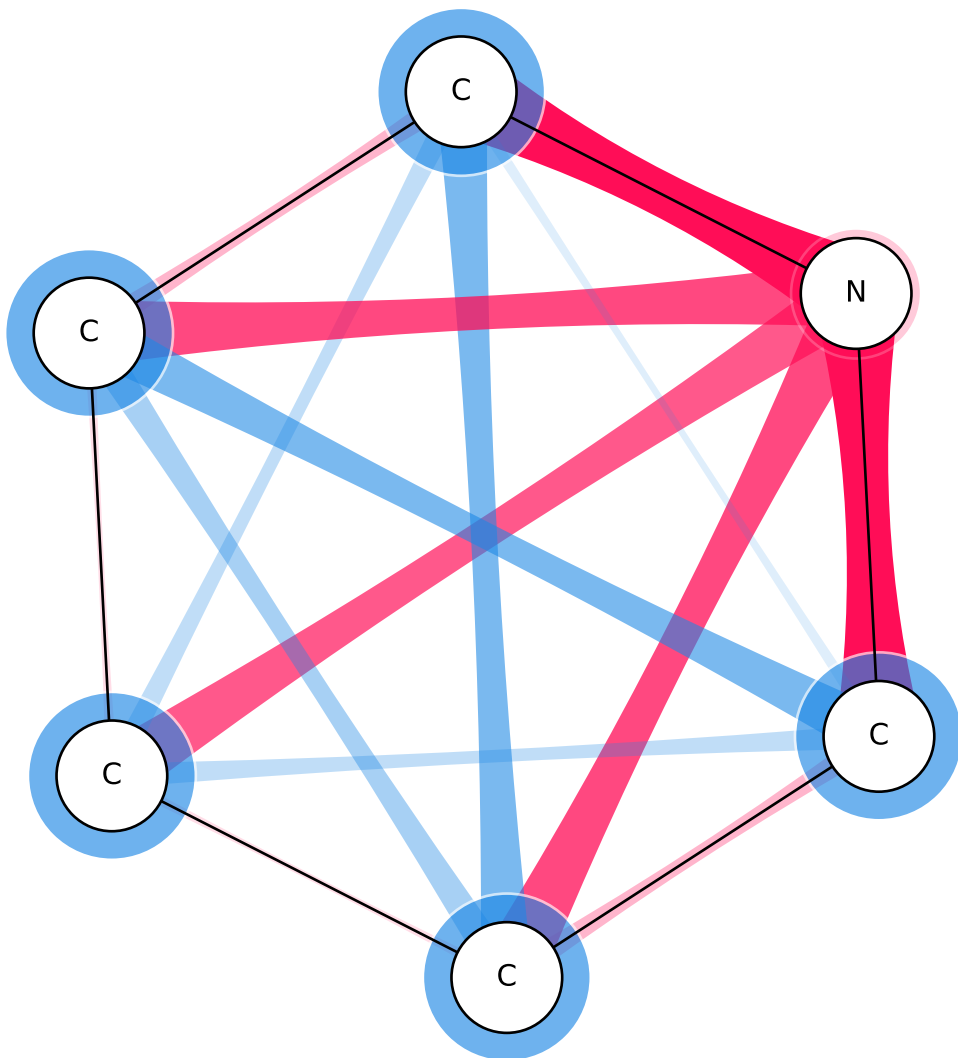

Supplement: supplementary_material [file attachment]
