# Supplementary material
Source: ML conference proceedings conference paper supplement (https://openreview.net/forum?id=9tKC0YM8sX)

## SII-6 Explanation

Model: GCN, Dataset: Mutagenicity, Layers: 2, Data ID: 71, Label 0  
Predicted and Explained Class 0 ( $p > 0.99$ , logits. = 76.22)

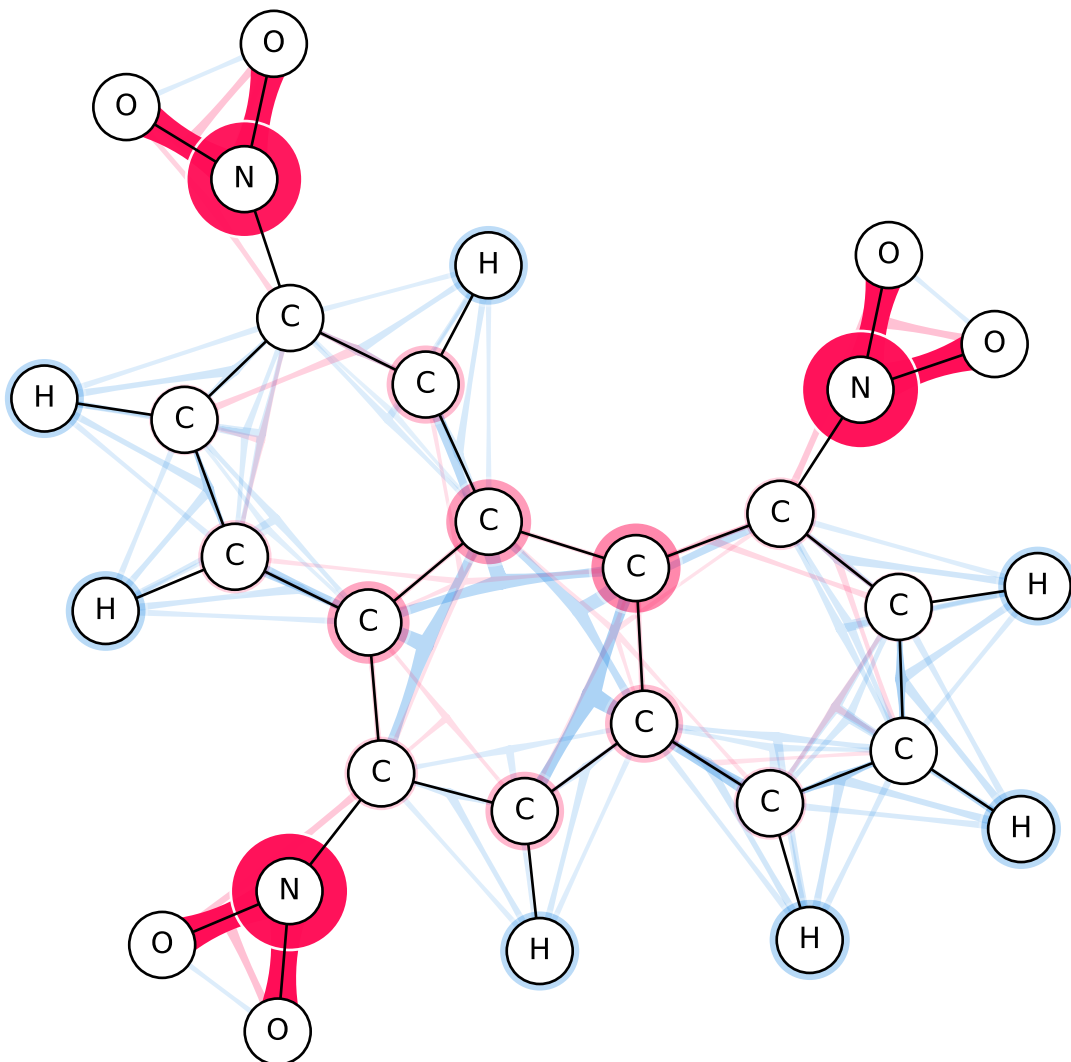

Supplement: supplementary_material [file attachment]
