# Supplementary material
Source: ML conference proceedings conference paper supplement (https://openreview.net/forum?id=9tKC0YM8sX)
Supplement: supplementary_material [file attachment]

## Baselines

**SV**    KernelSHAP    k-add. KernelSHAP    Permutation Sampling    Unbiased KernelSHAP    SVARM    L-Shapley

**2 – SII**    KernelSHAP-IQ    Inc. KernelSHAP-IQ    Permutation Sampling    SHAP-IQ    SVARM-IQ
