# Supplementary material
Source: ML conference proceedings conference paper supplement (https://openreview.net/forum?id=9tKC0YM8sX)
Supplement: supplementary_material [file attachment]

**ID: 3552**  
*(MTG)*

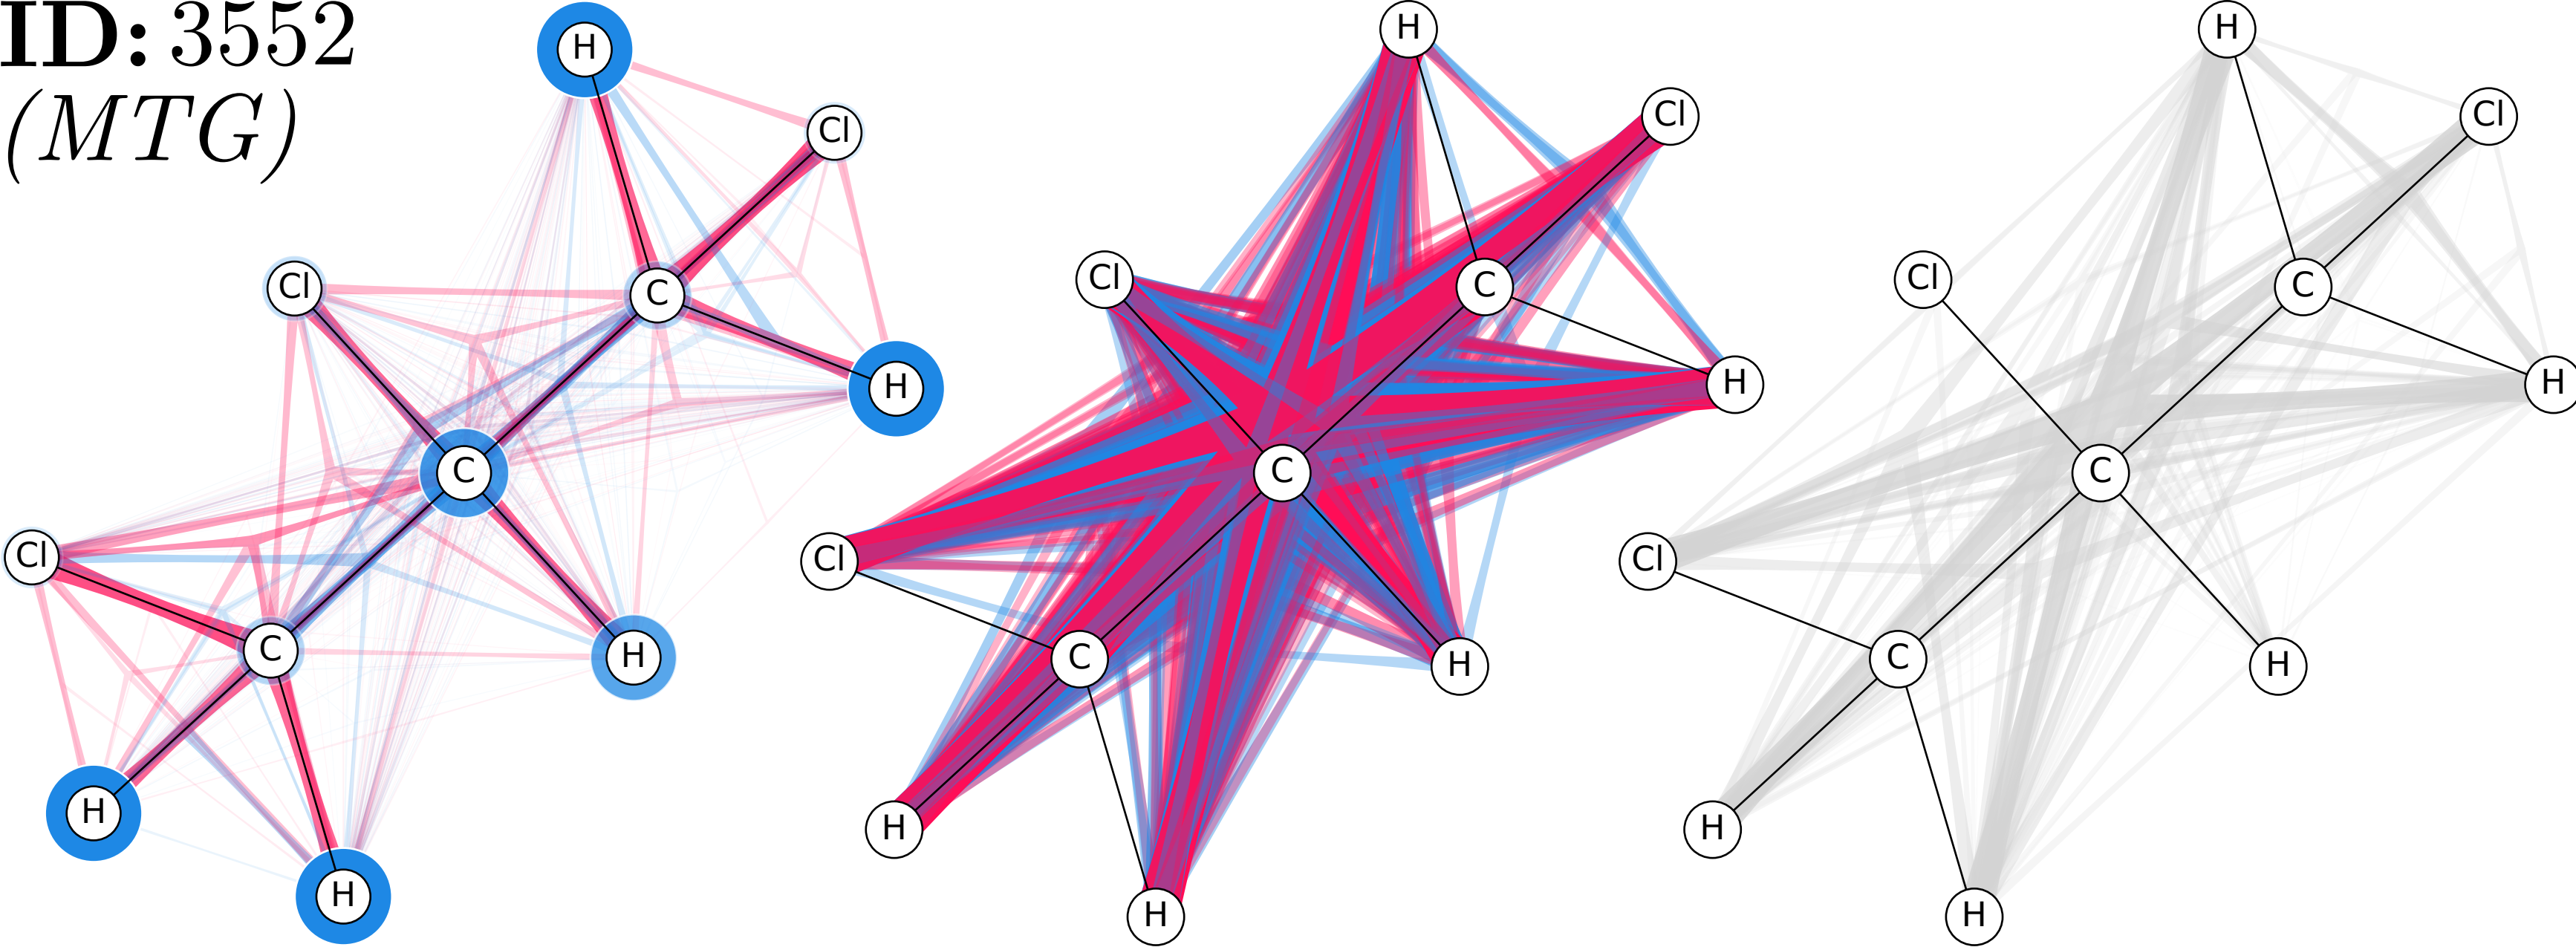

**linear readout**  
(all MIs)

**deep readout**  
(all MIs)

**deep readout**  
(MIs outside RF)

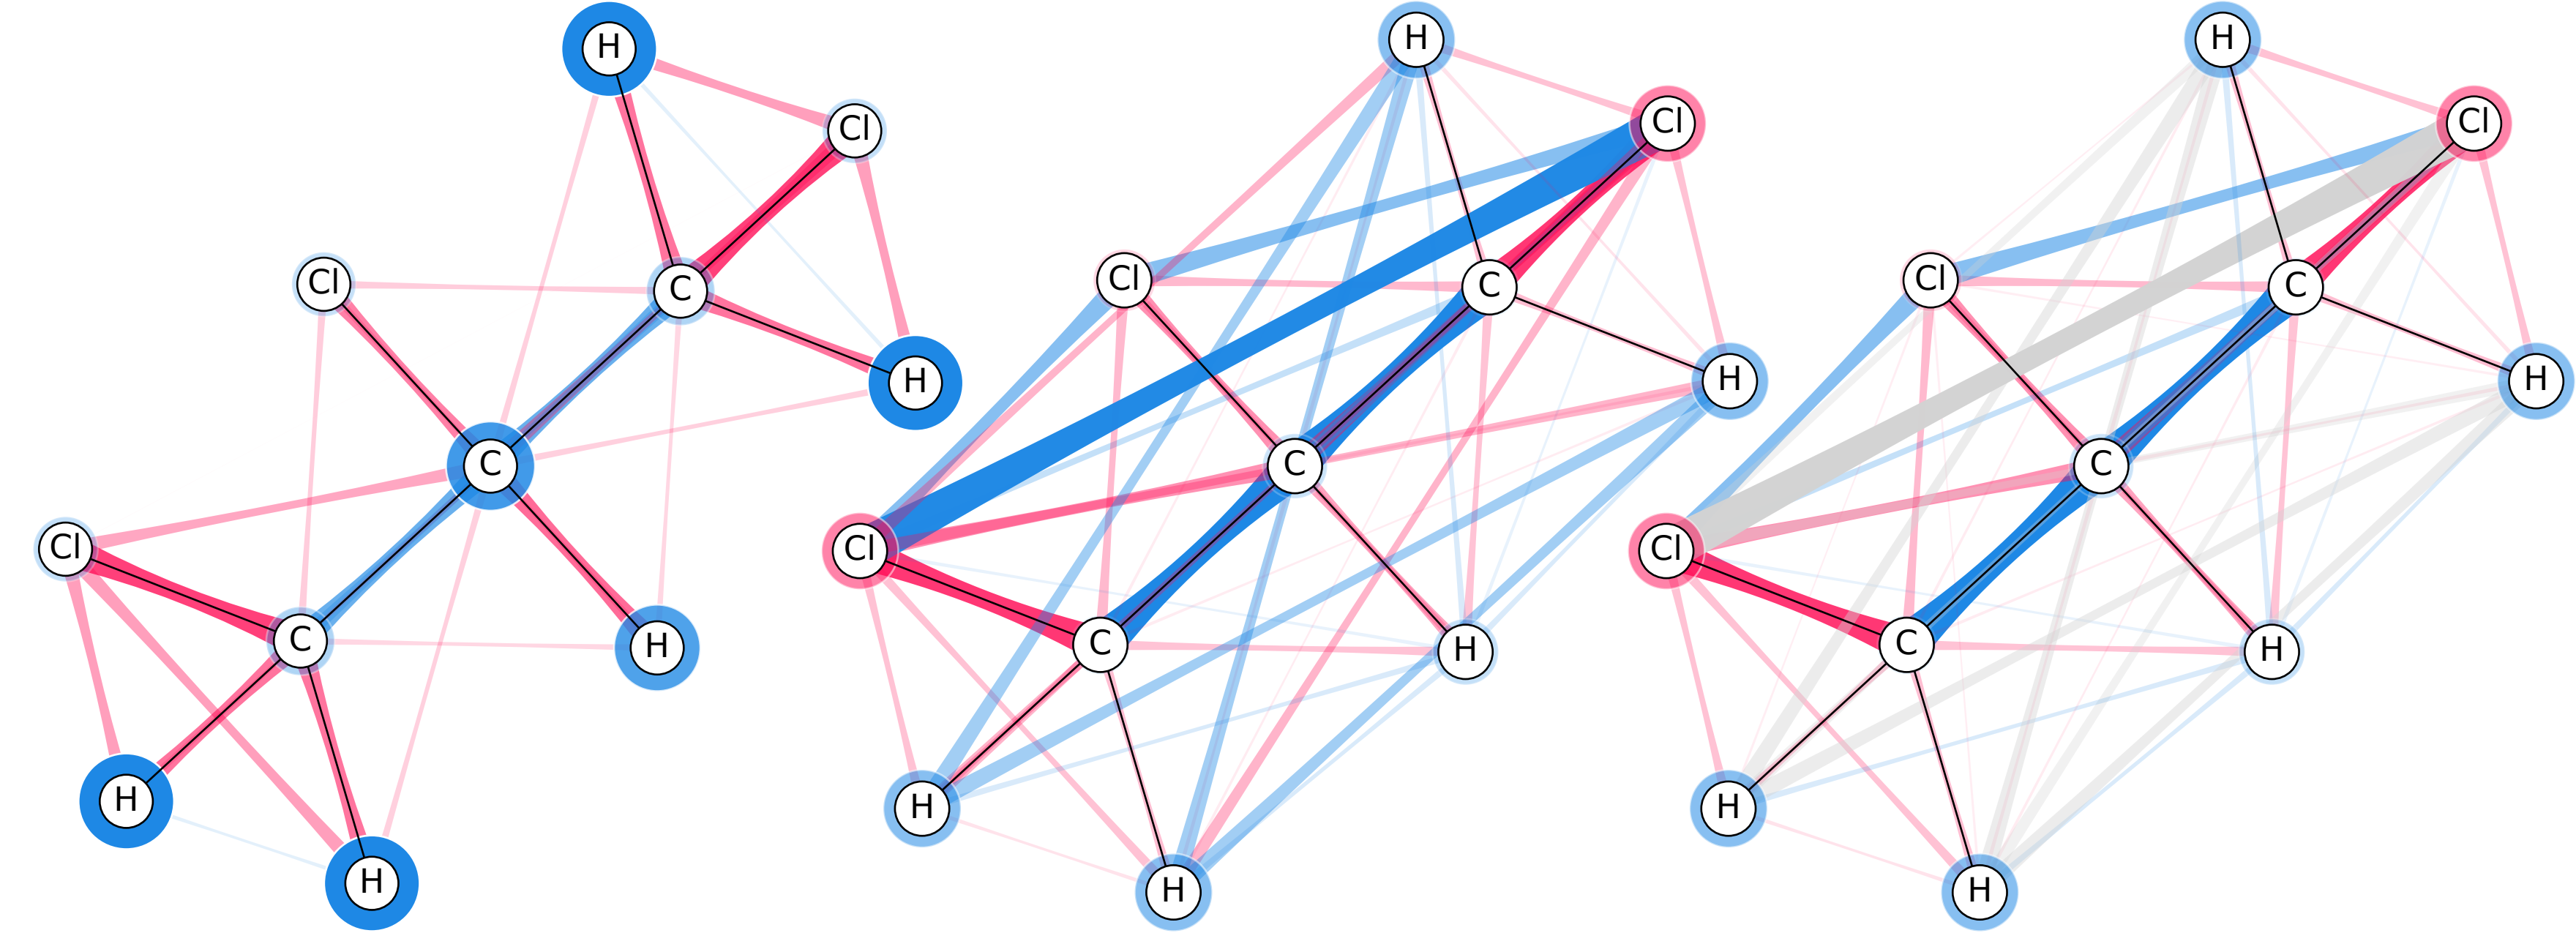

**linear readout**  
(all 2-SIIs)

**deep readout**  
(all 2-SIIs)

**deep readout**  
(all 2-SIIs, recolored)
