# Supplementary material
Source: ML conference proceedings conference paper supplement (https://openreview.net/forum?id=9tKC0YM8sX)

# SV for BZR with 2-layer GAT

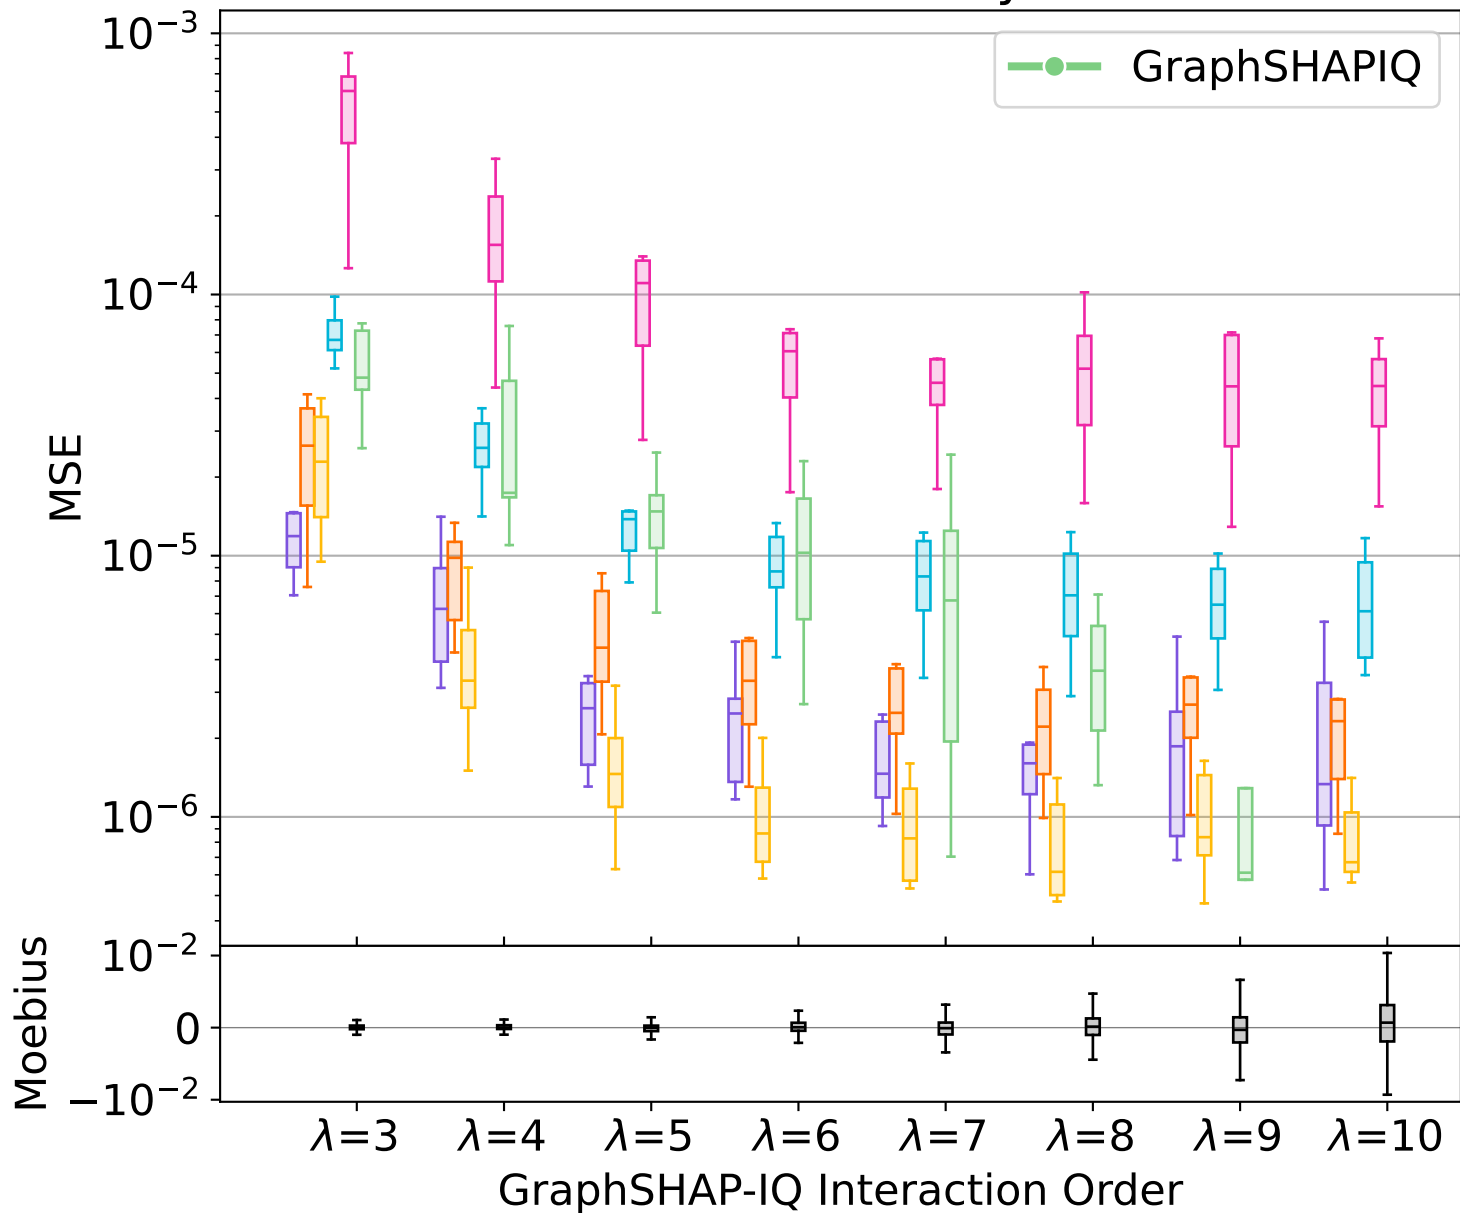

Supplement: supplementary_material [file attachment]

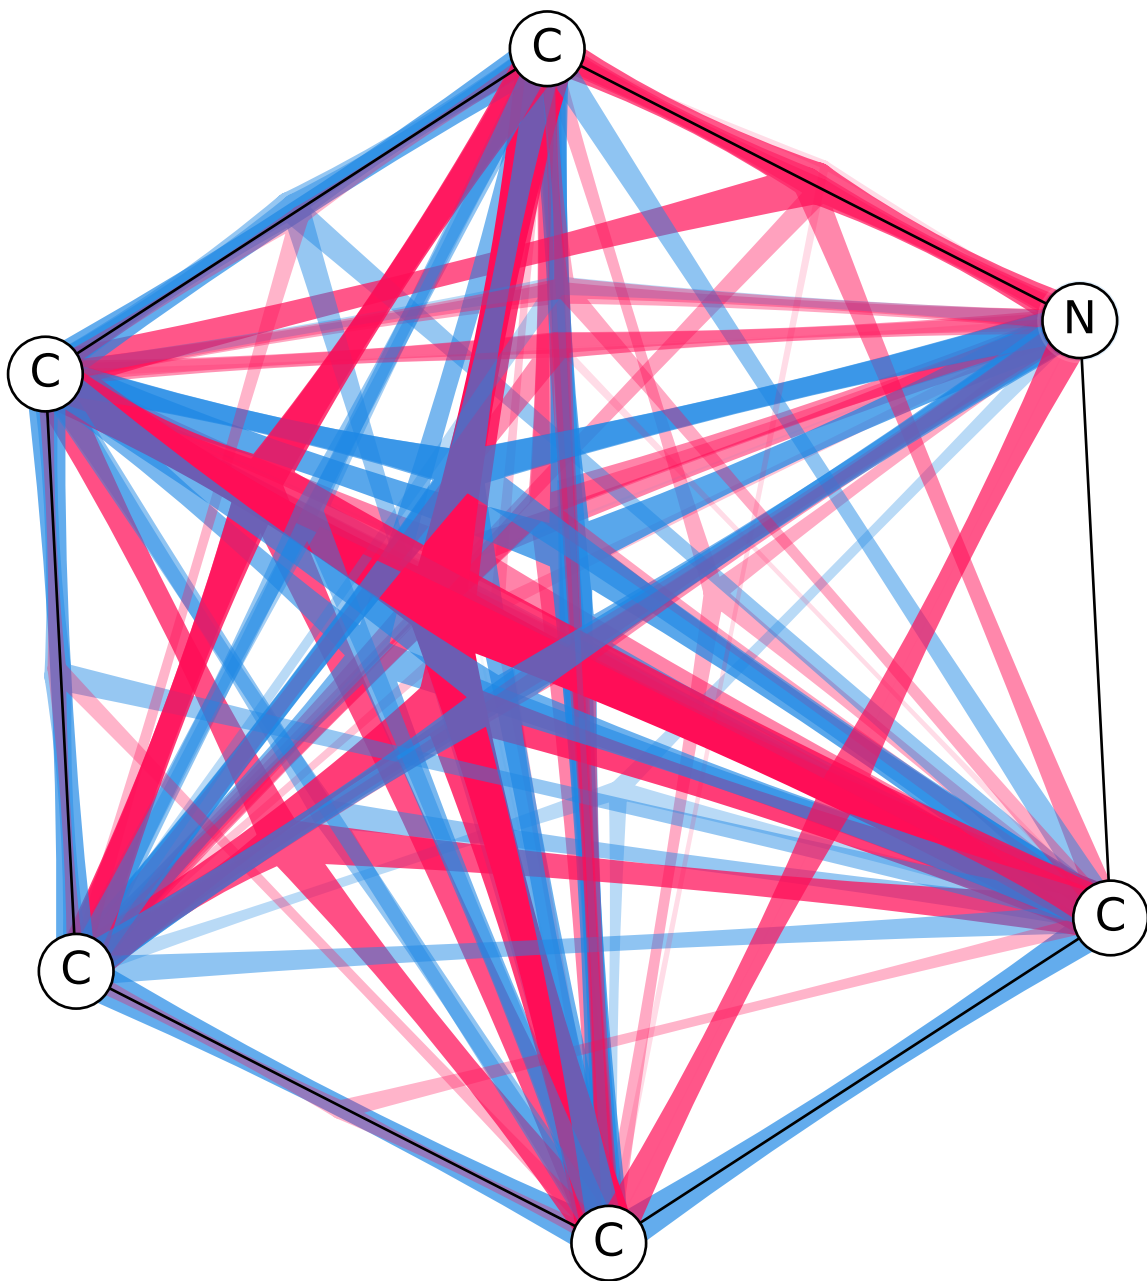

Supplement: supplementary_material [file attachment]

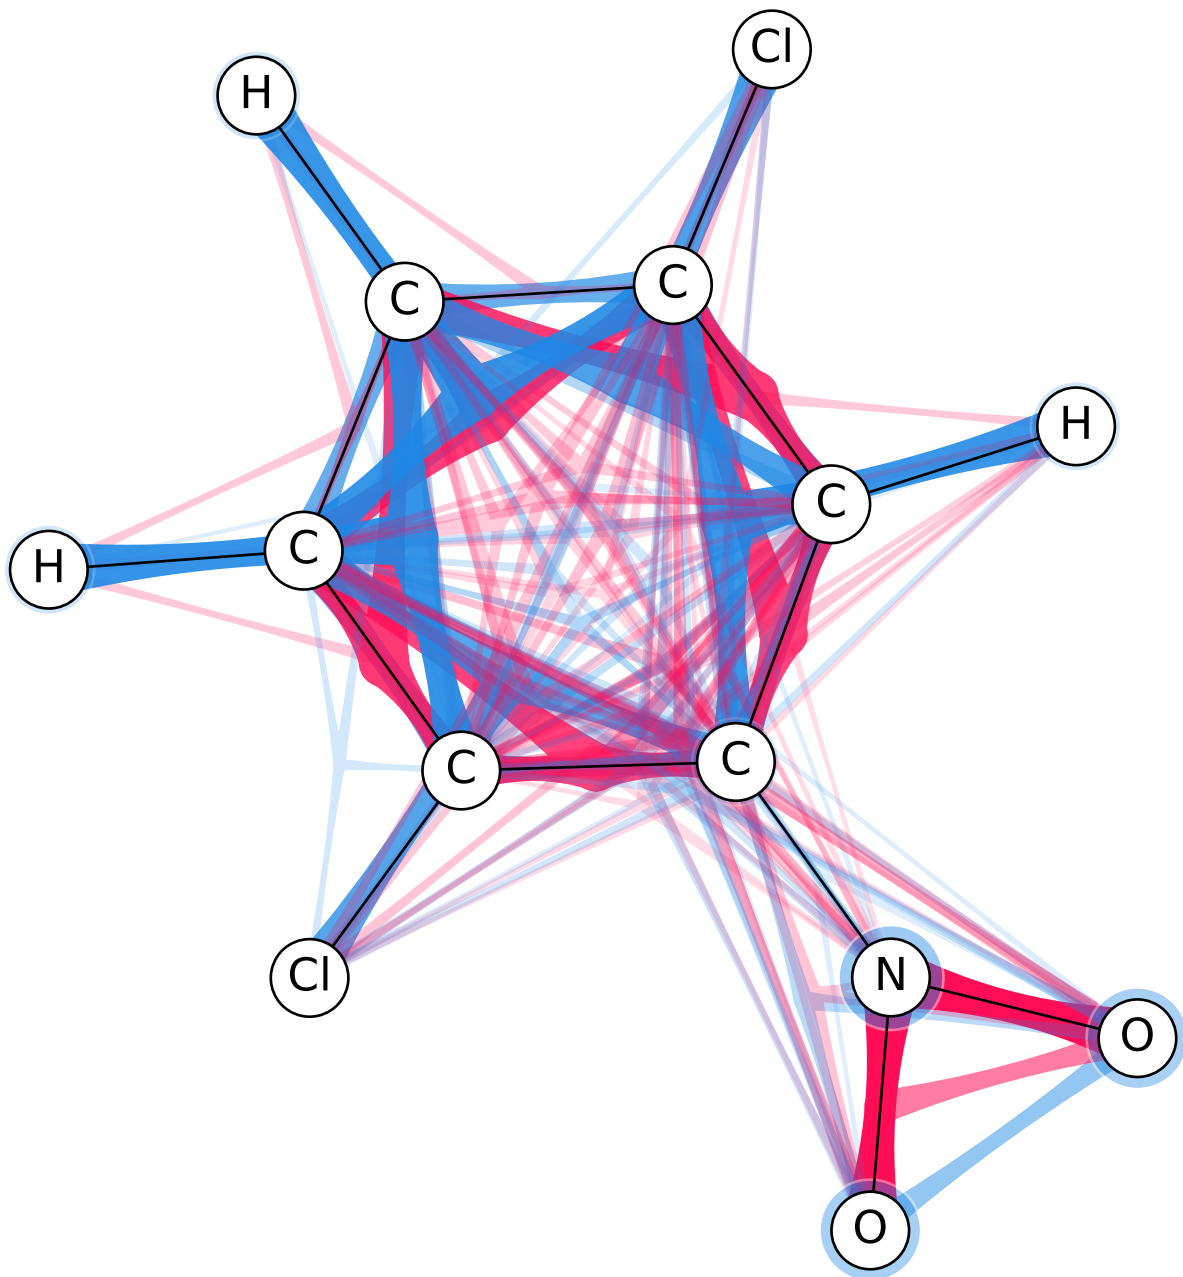

Supplement: supplementary_material [file attachment]

2-SII for Mutagenicity with 2-layer GIN

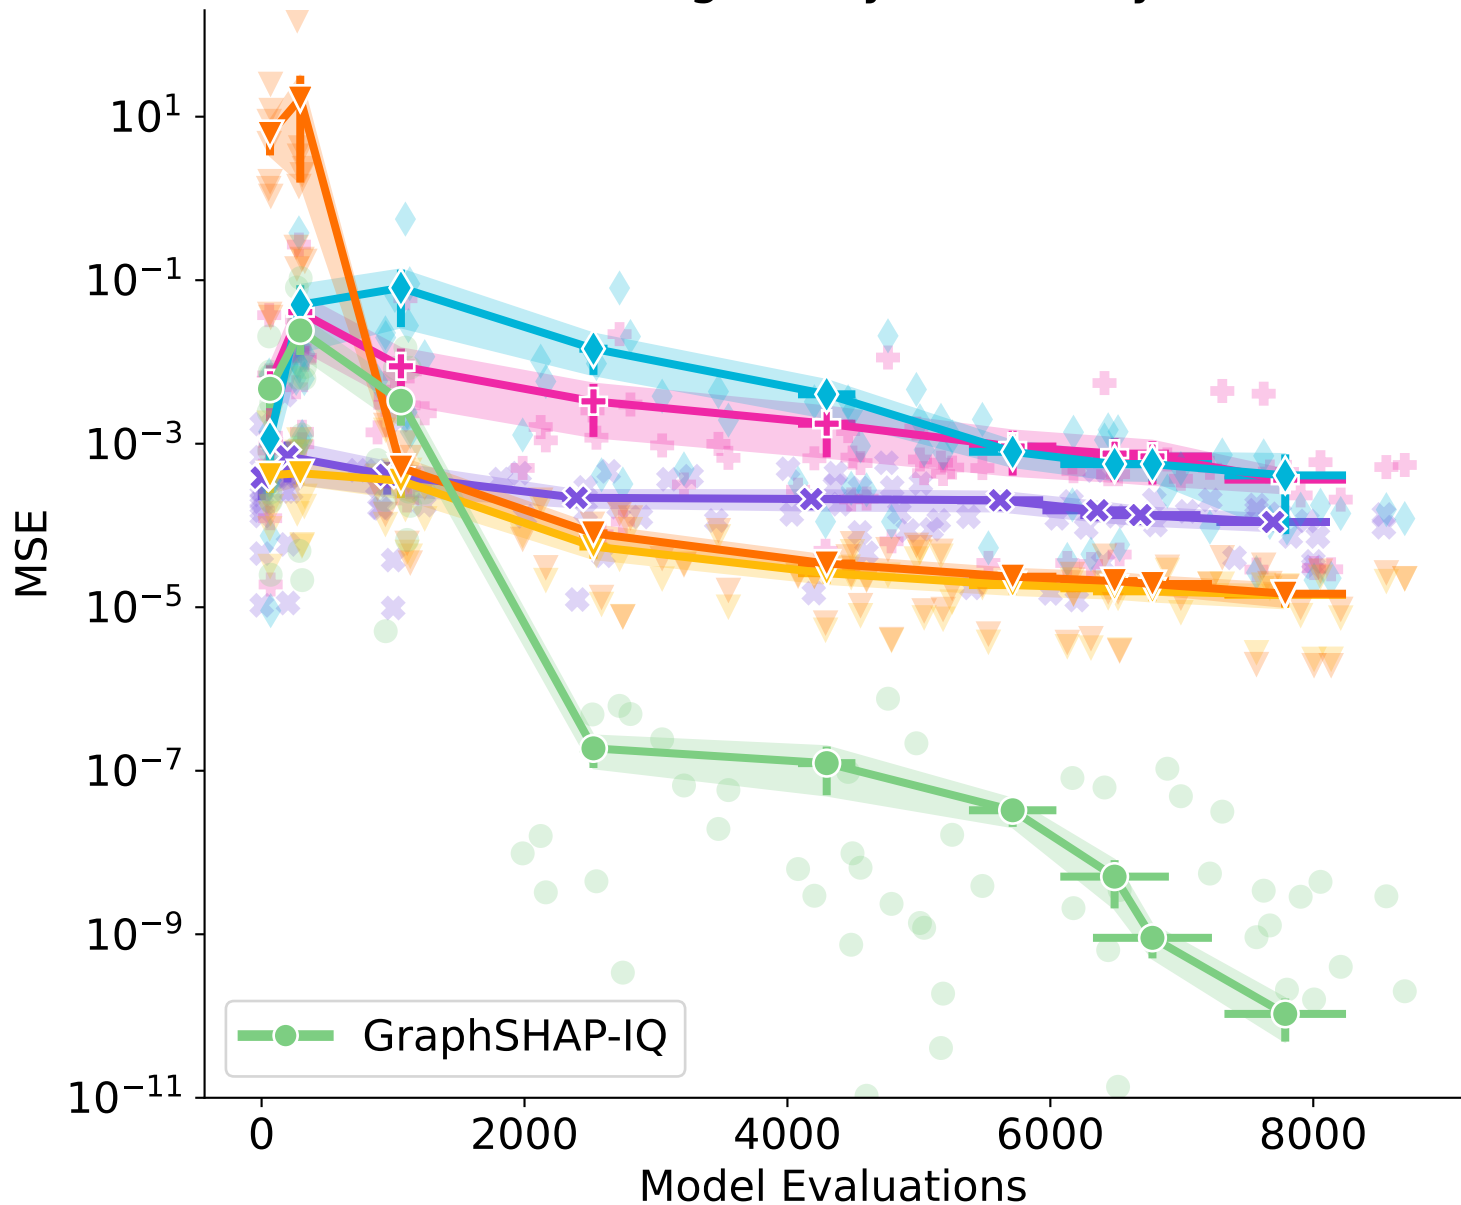

Supplement: supplementary_material [file attachment]

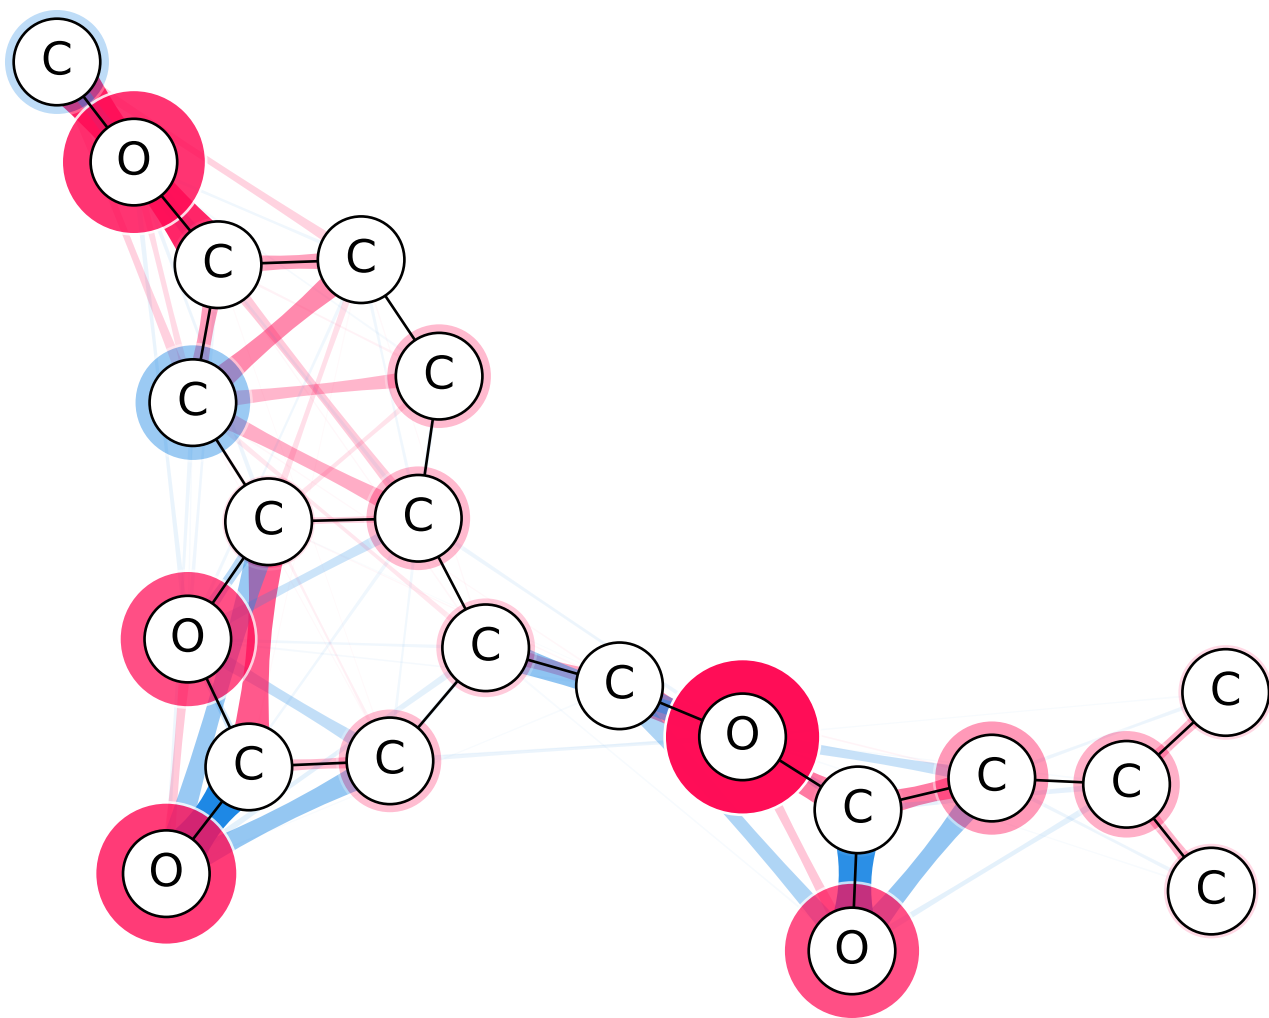

Supplement: supplementary_material [file attachment]

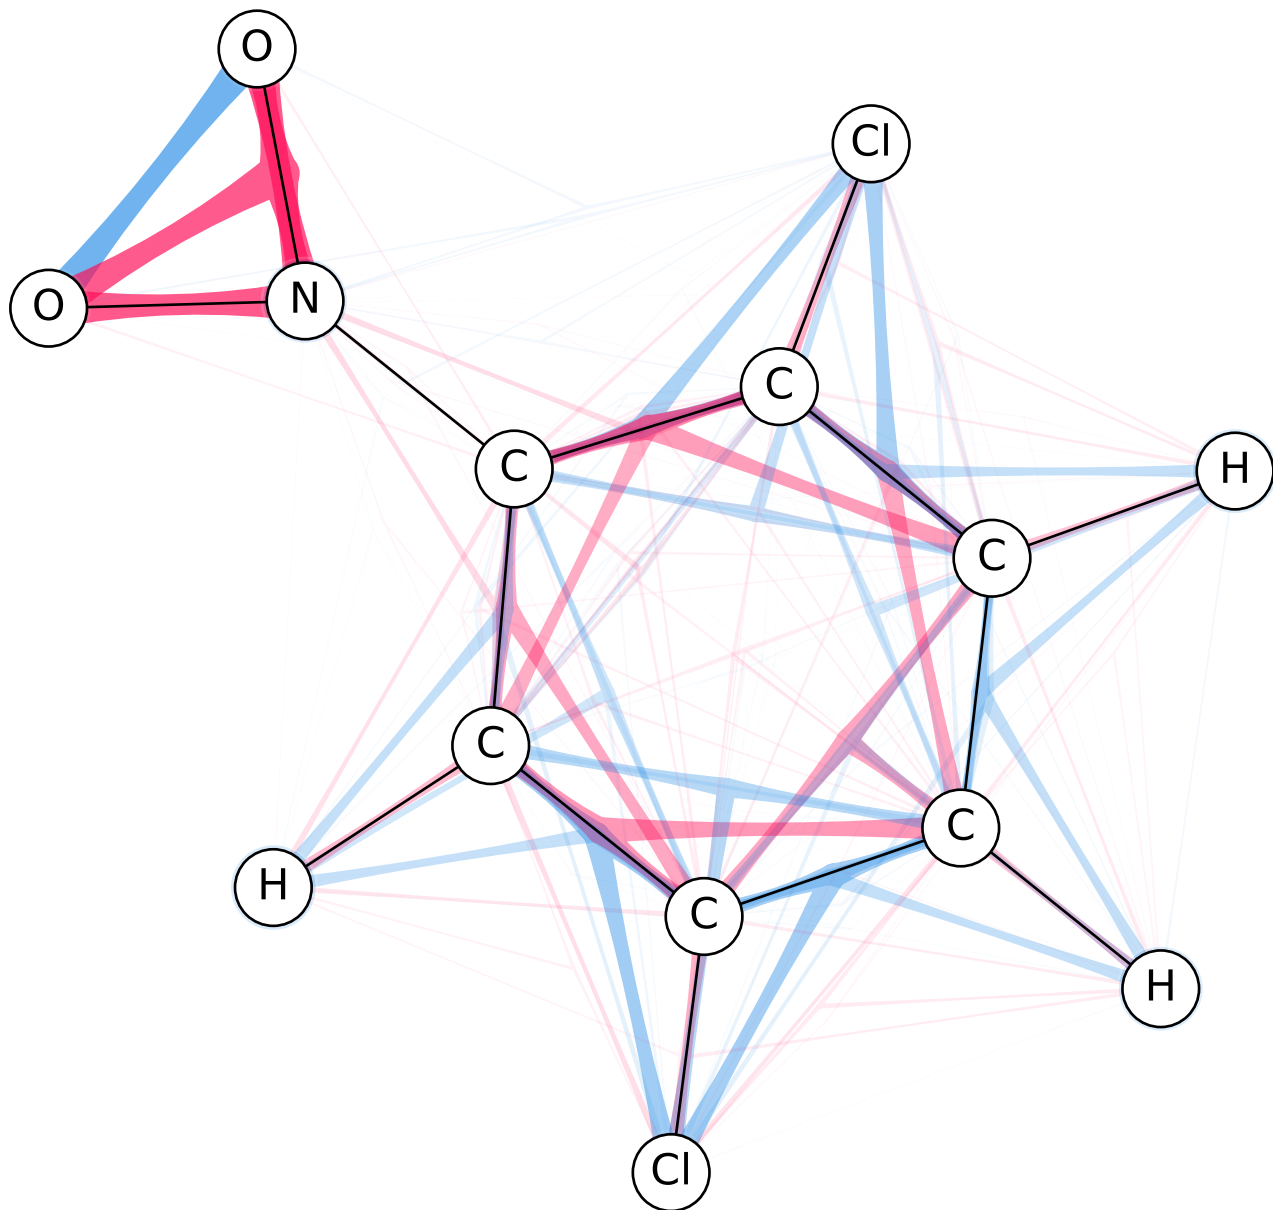

Supplement: supplementary_material [file attachment]

## 2-SII for BZR with 2-layer GCN

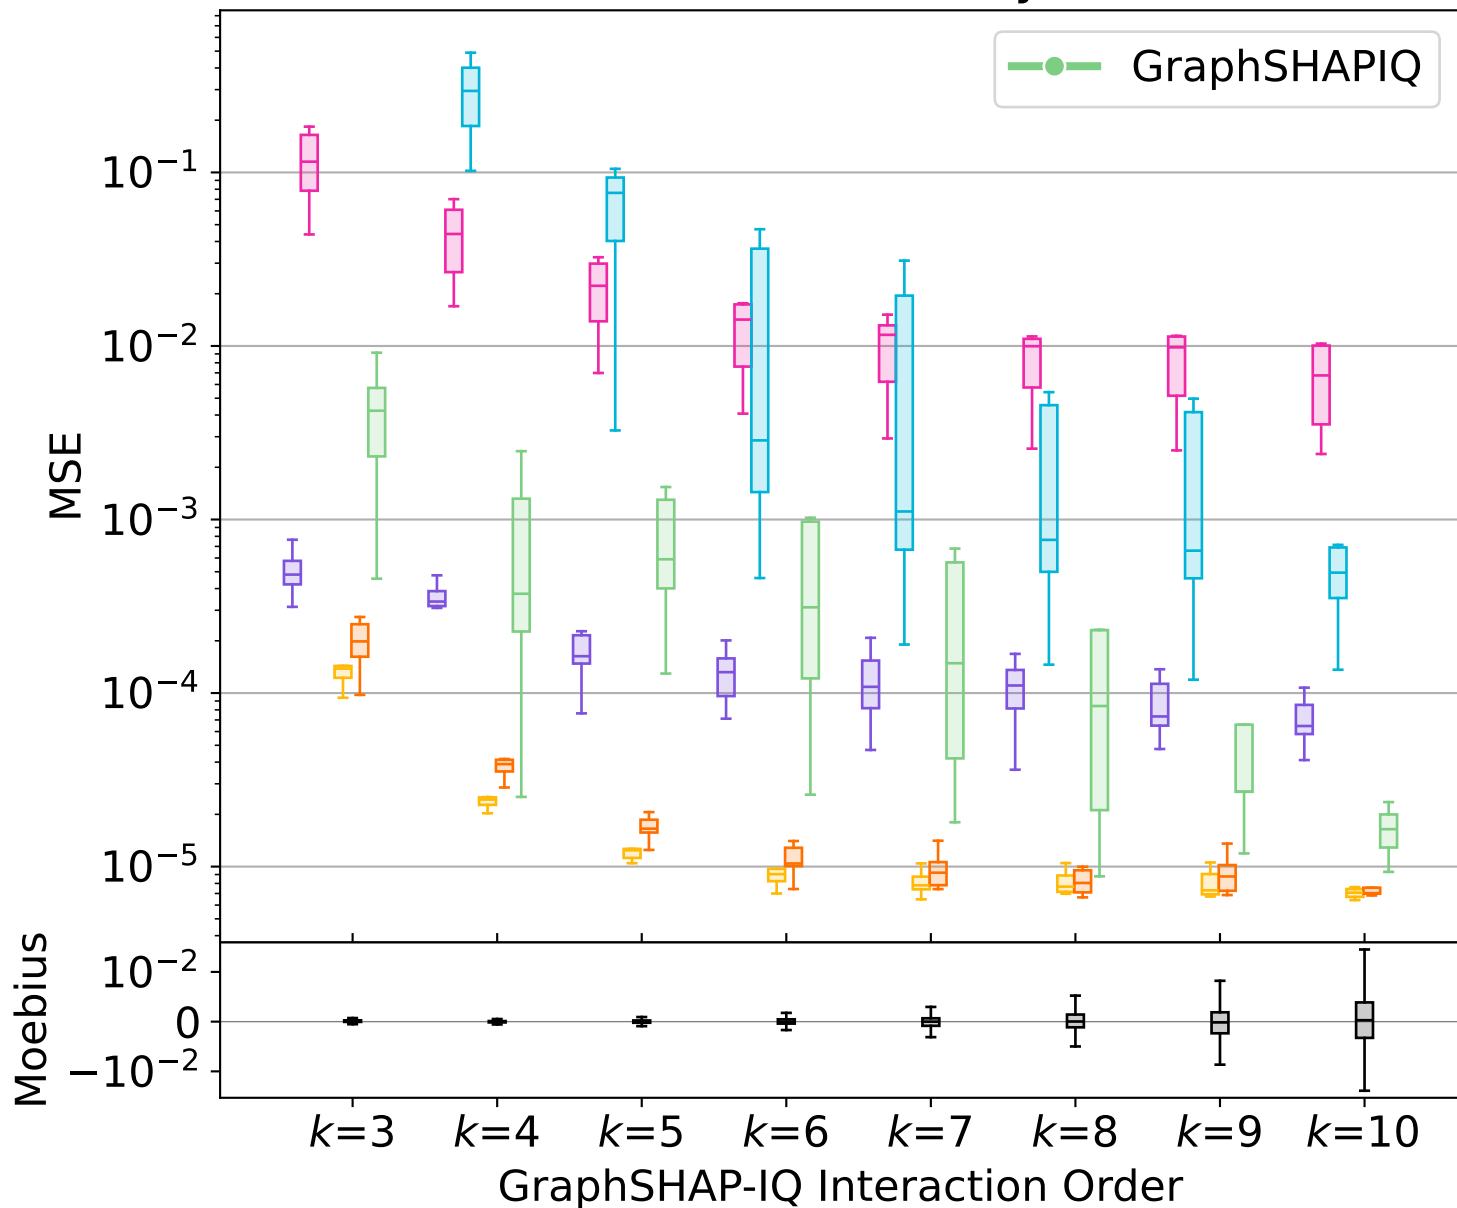

Supplement: supplementary_material [file attachment]

**SI order = 1**

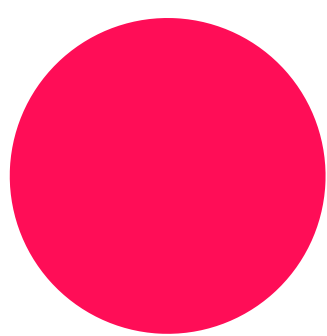

high pos.

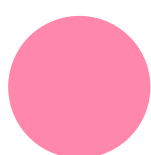

low pos.

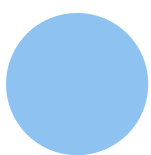

low neg.

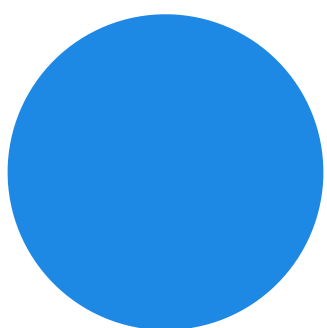

high neg.

**SI order > 1**

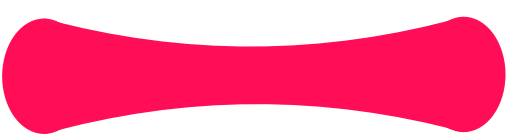

high pos.

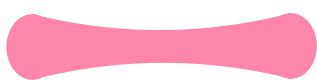

low pos.

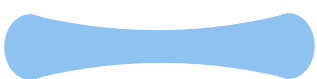

low neg.

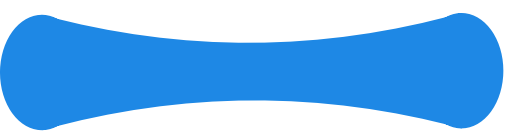

high neg.

Supplement: supplementary_material [file attachment]

## Baselines

**2 – SII**  KernelSHAP-IQ  Inc. KernelSHAP-IQ  Permutation Sampling  SHAP-IQ  SVARM-IQ

Supplement: supplementary_material [file attachment]

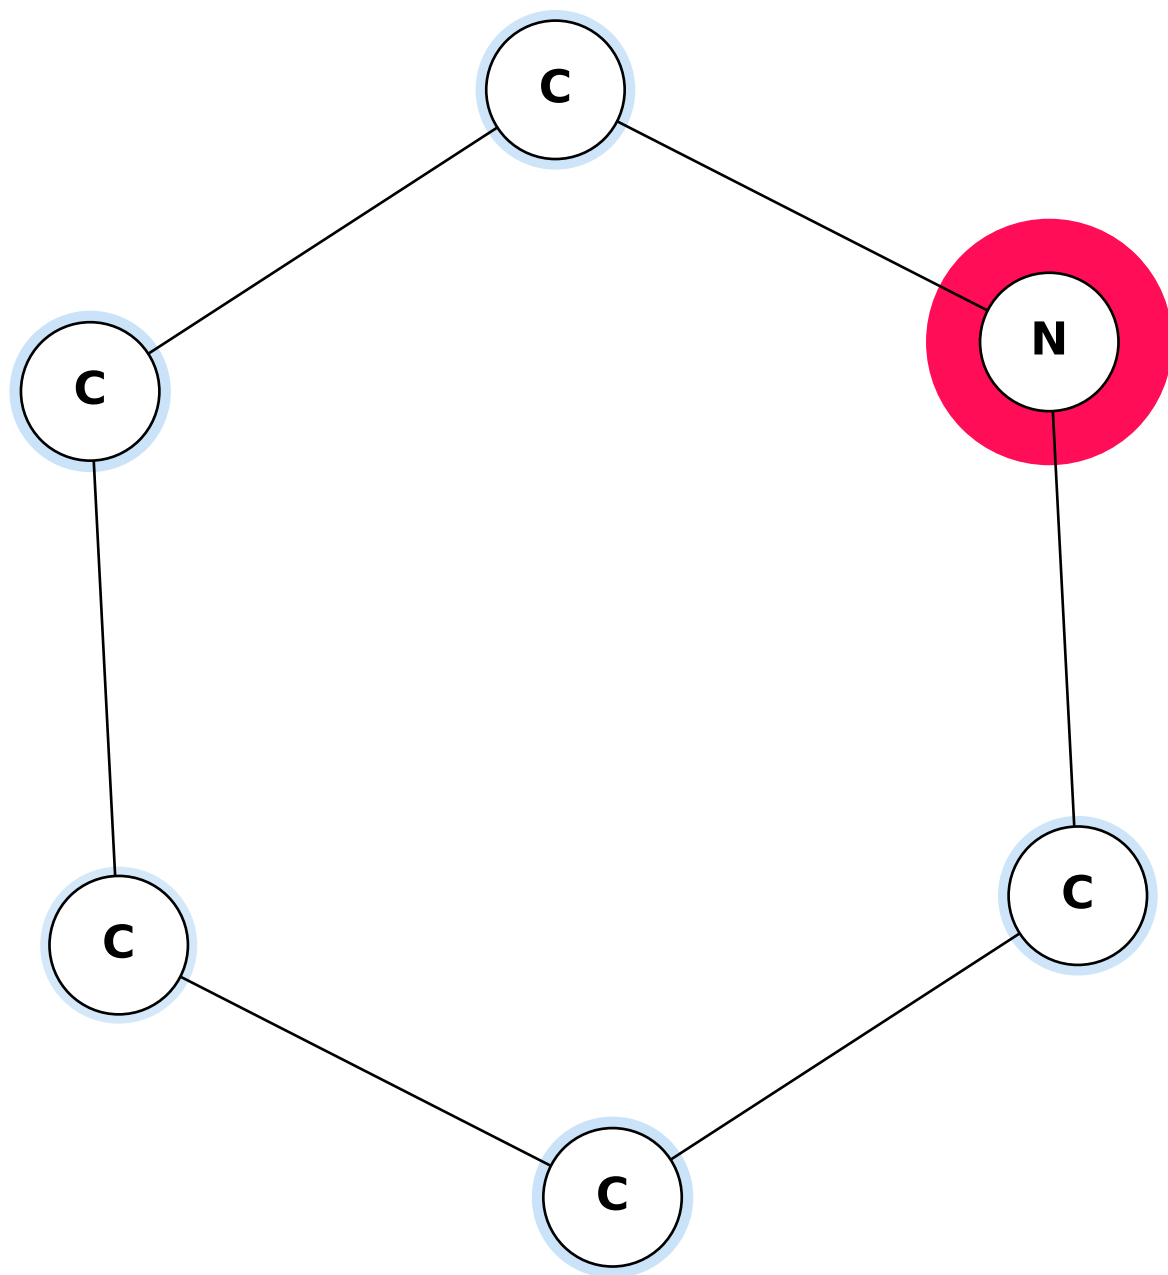

Supplement: supplementary_material [file attachment]

## 2-SII for Mutagenicity with 2-layer GIN

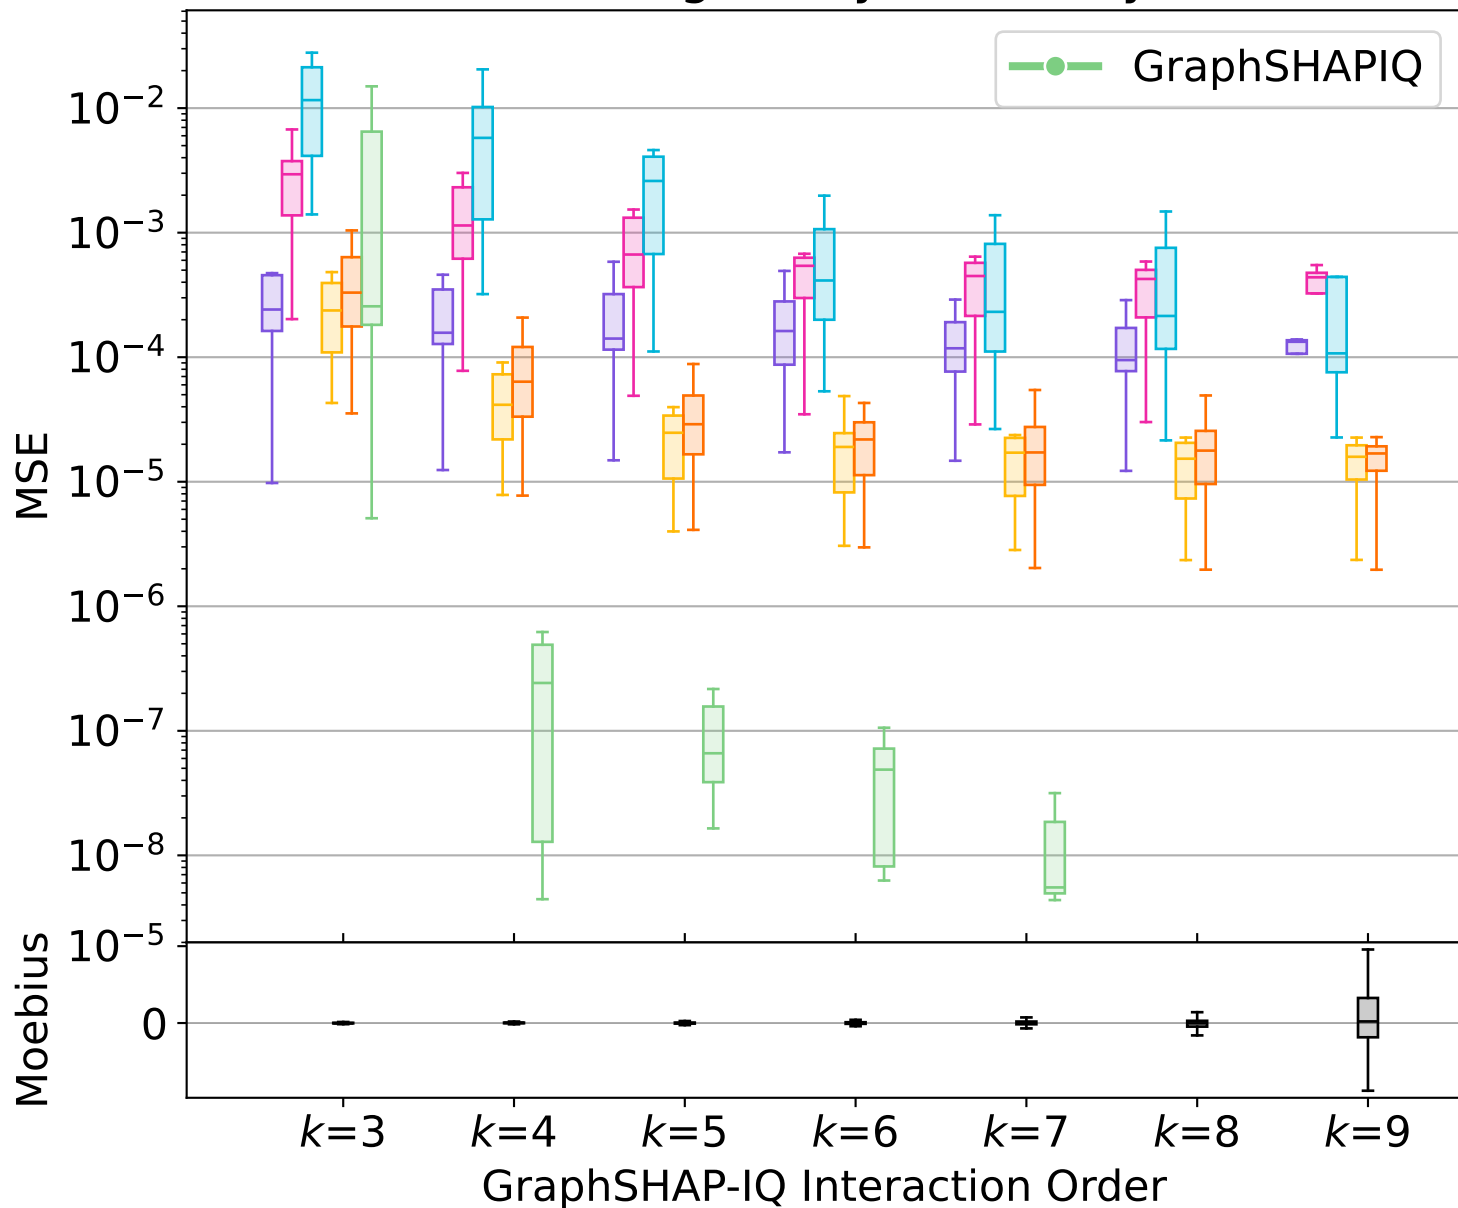

Supplement: supplementary_material [file attachment]

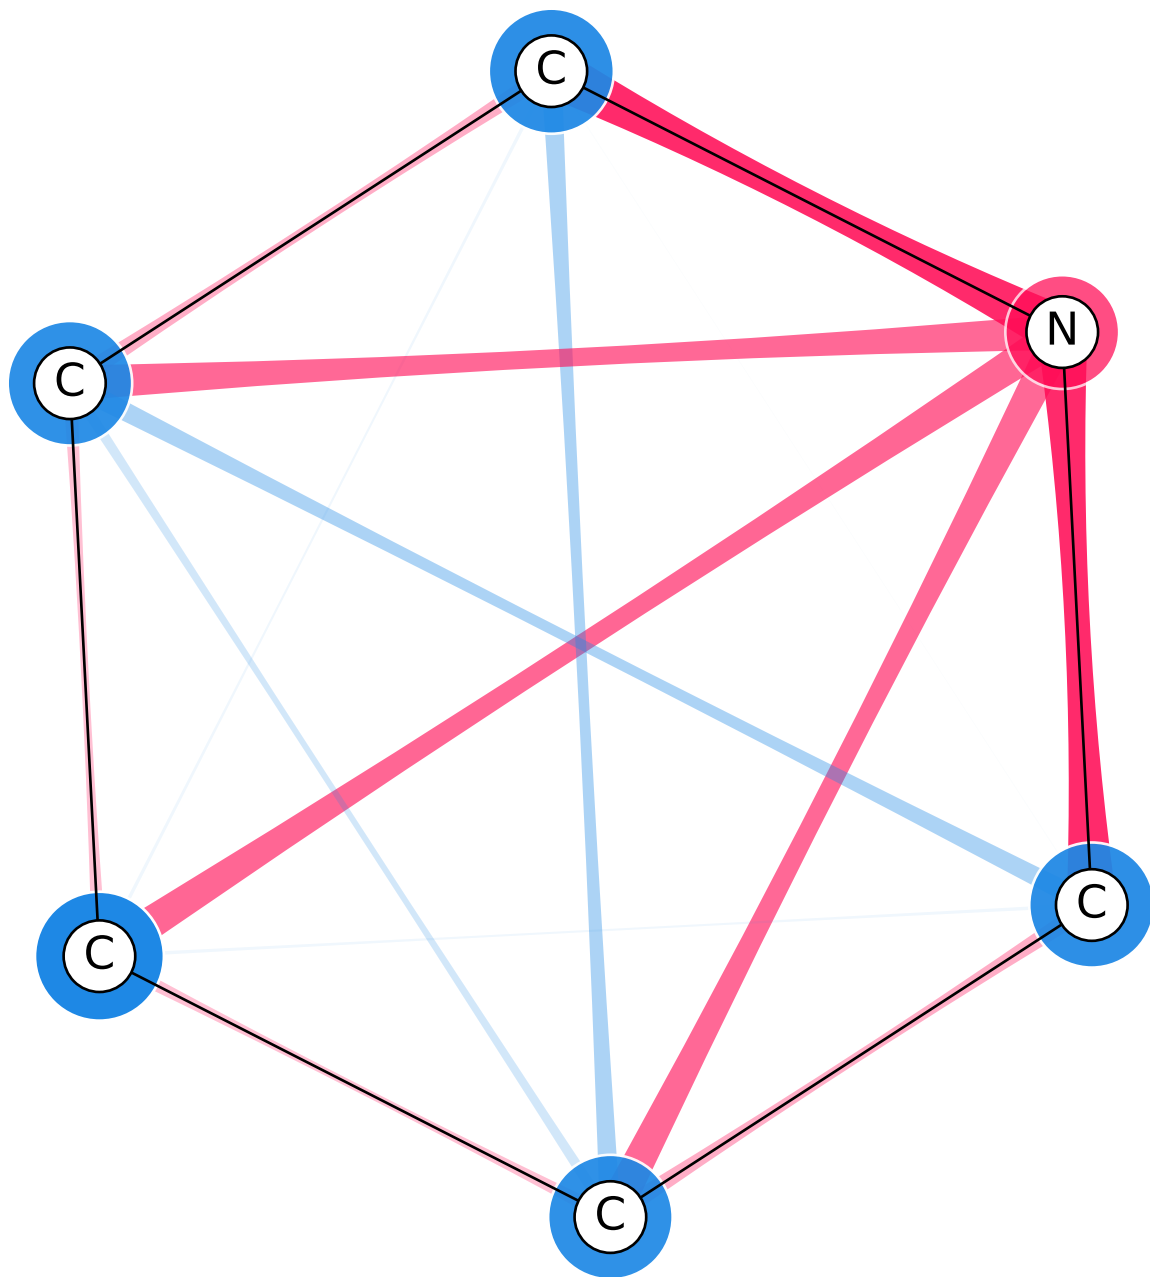

Supplement: supplementary_material [file attachment]

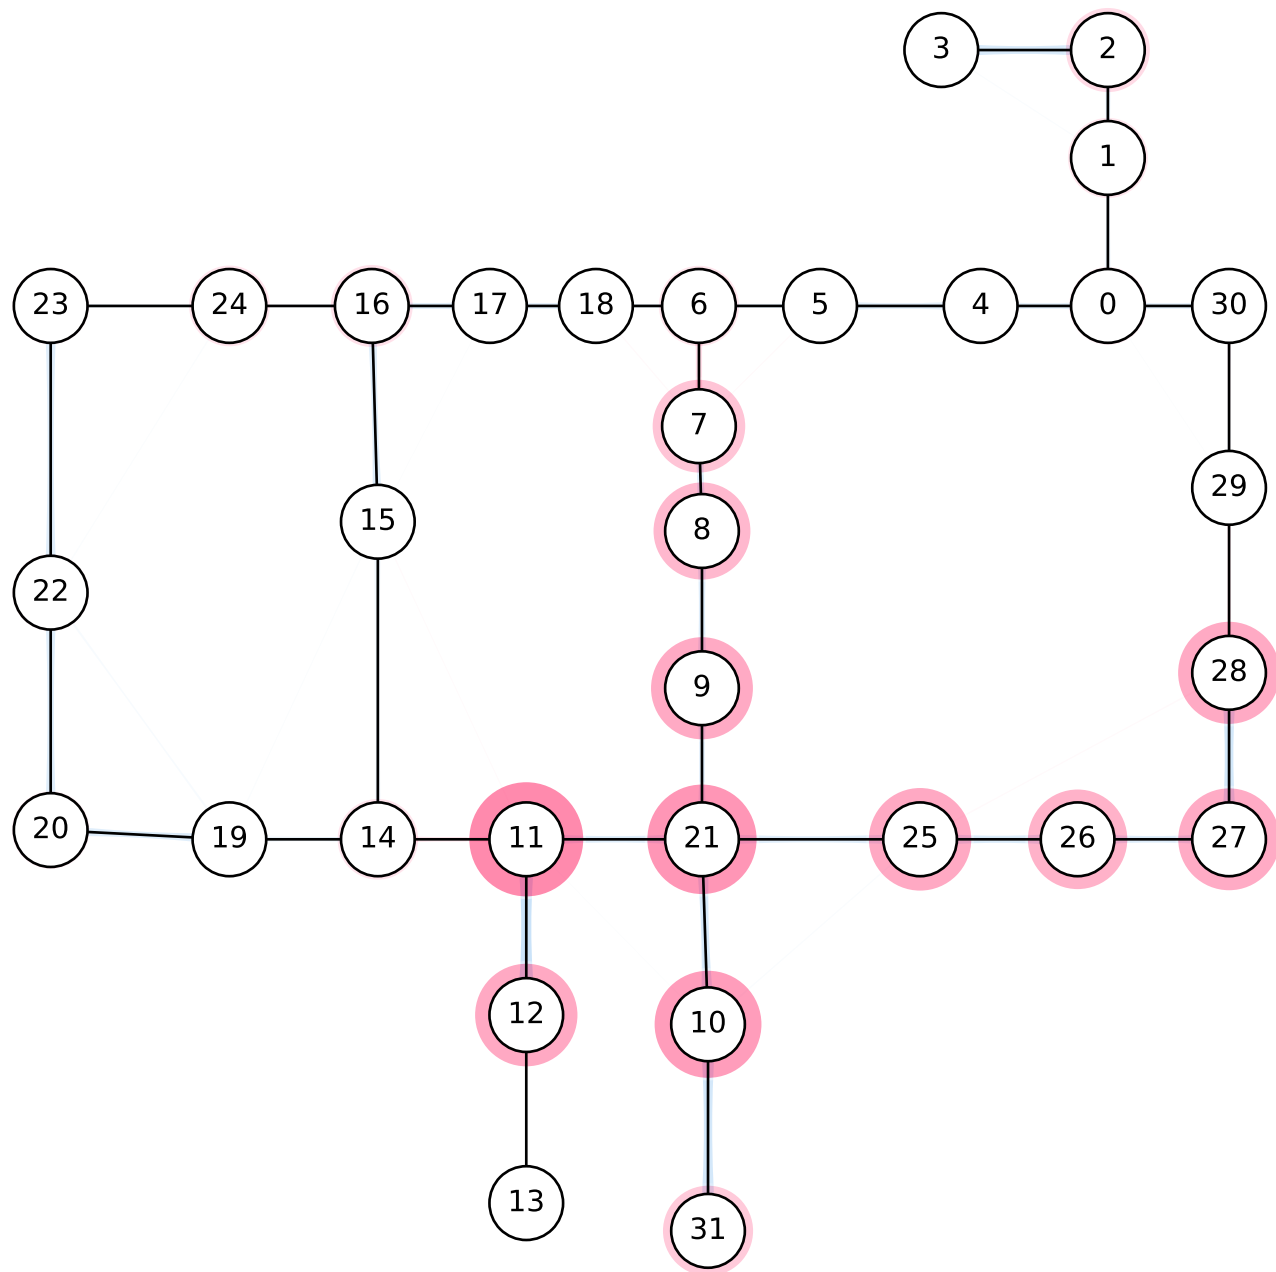

Supplement: supplementary_material [file attachment]

# SV for Mutagenicity with 2-layer GIN

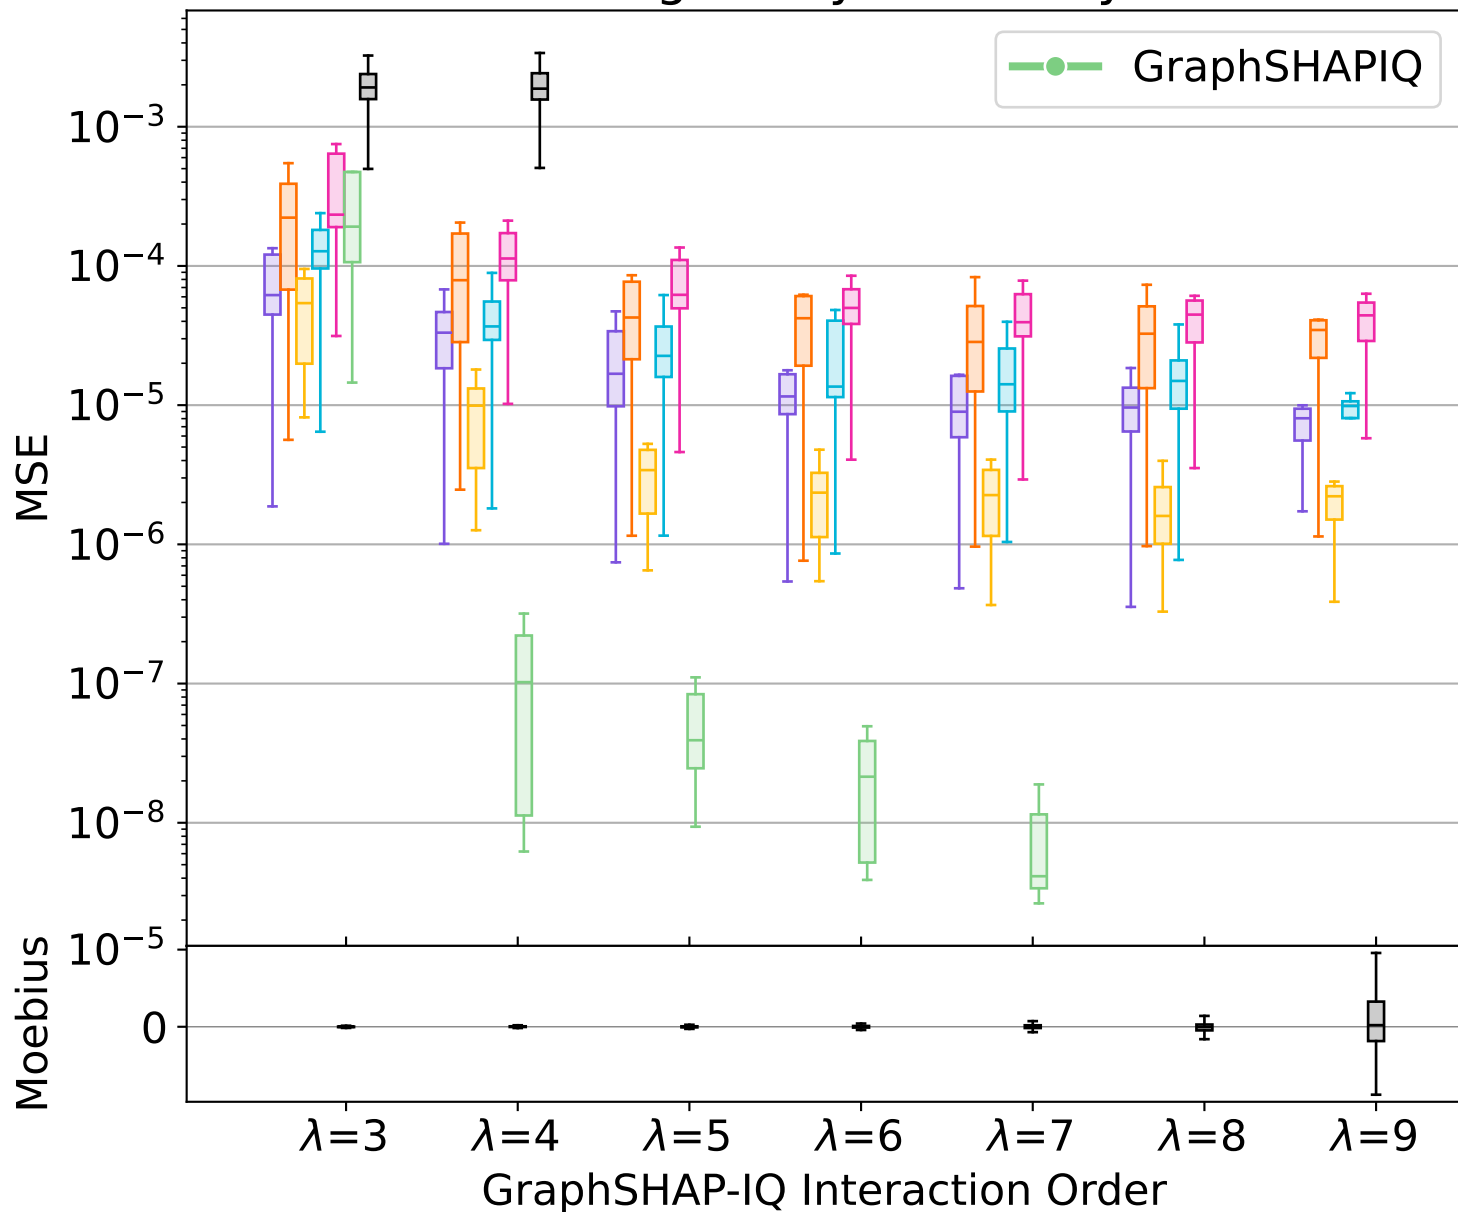

Supplement: supplementary_material [file attachment]

## 2-SII for PROTEINS with 2-layer GAT

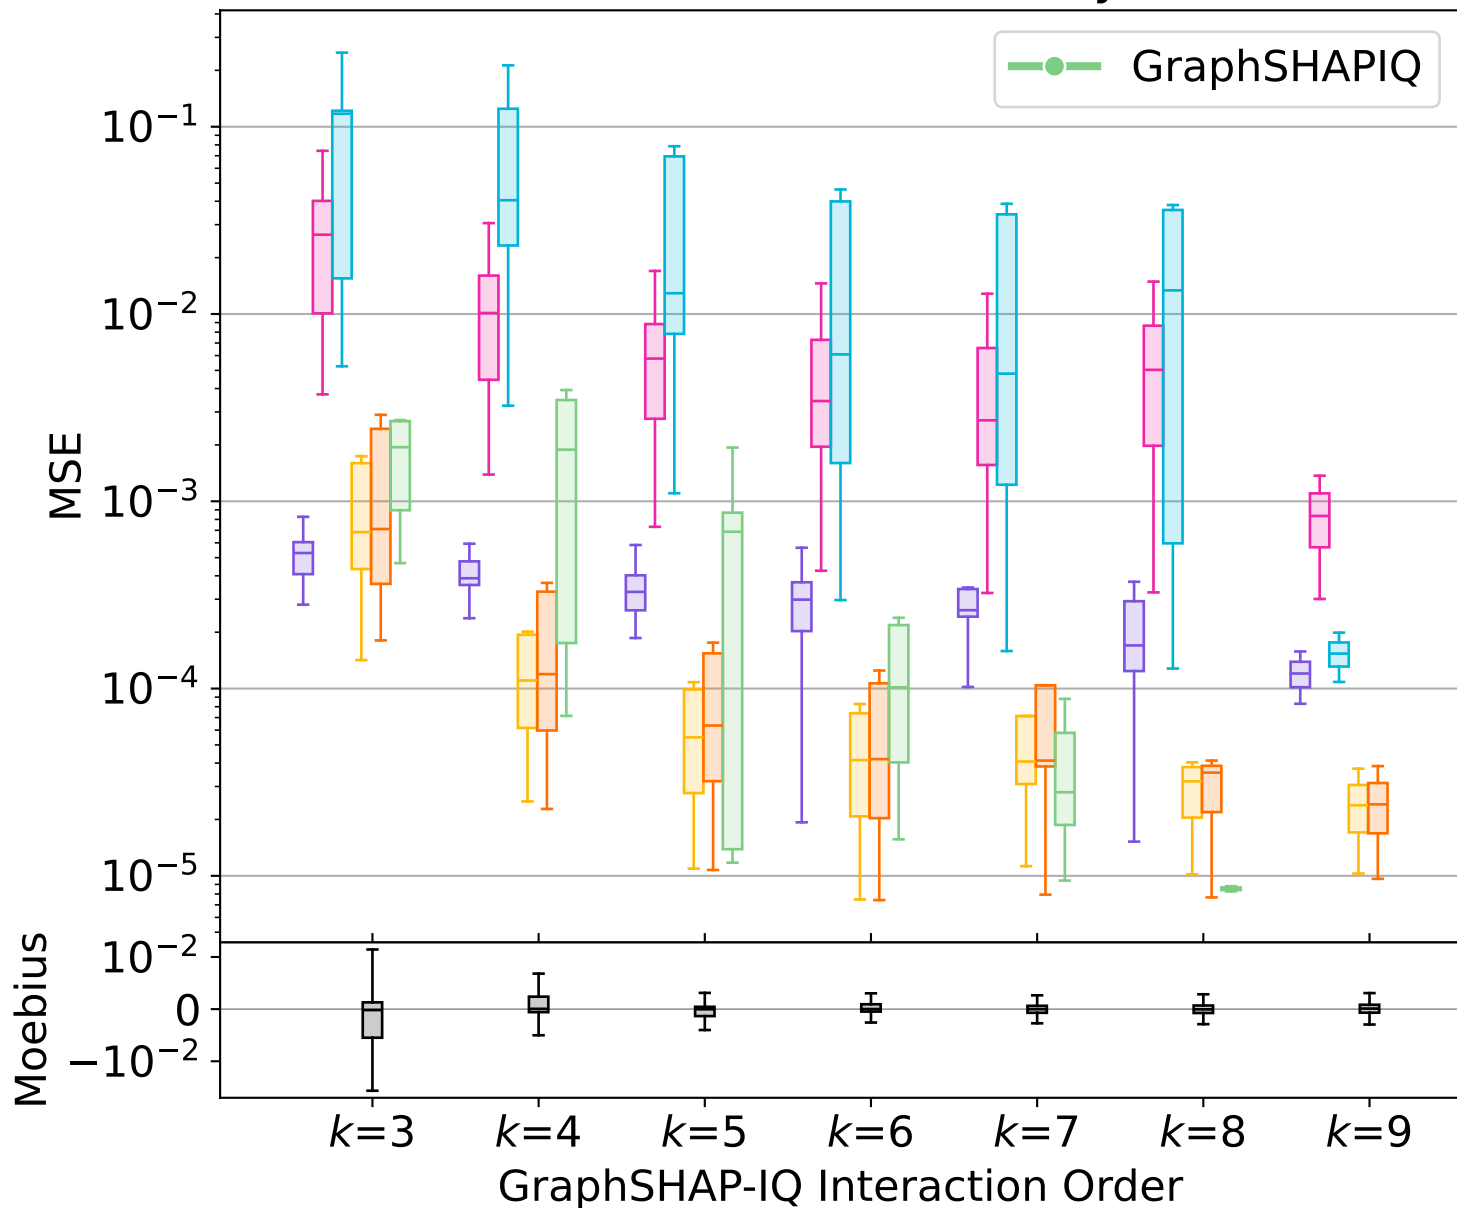

Supplement: supplementary_material [file attachment]

## 2-SII for PROTEINS with 2-layer GIN

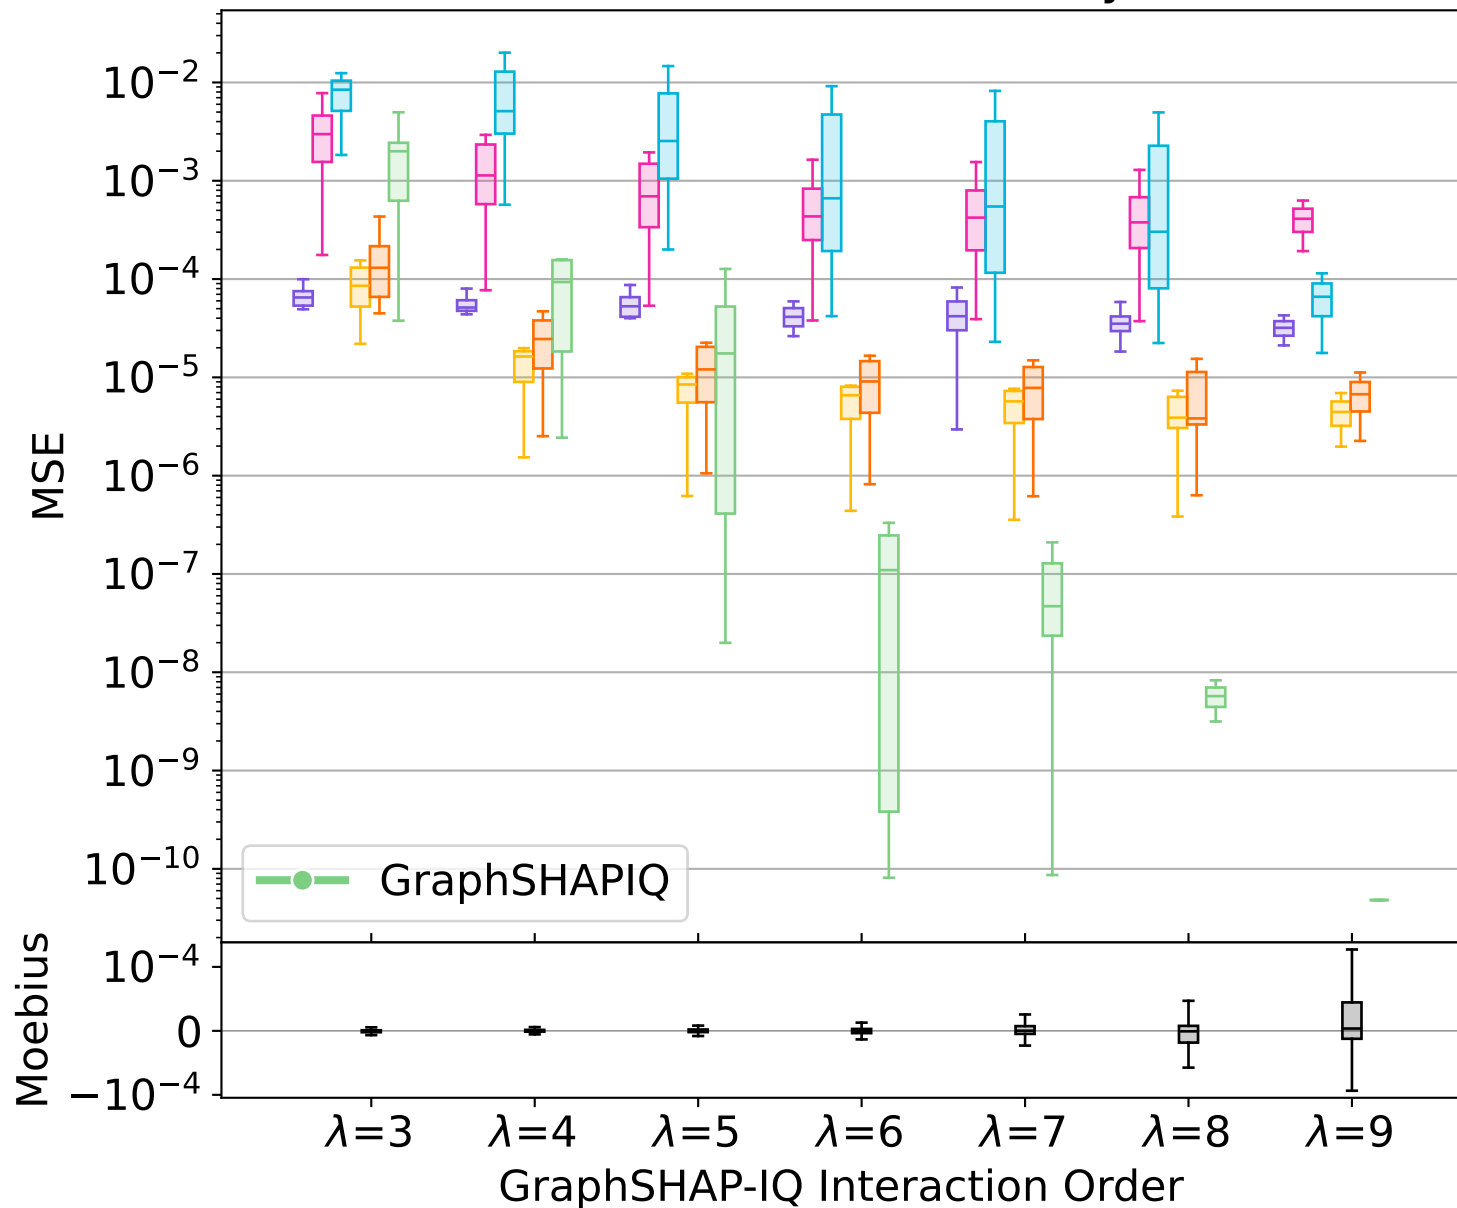

Supplement: supplementary_material [file attachment]

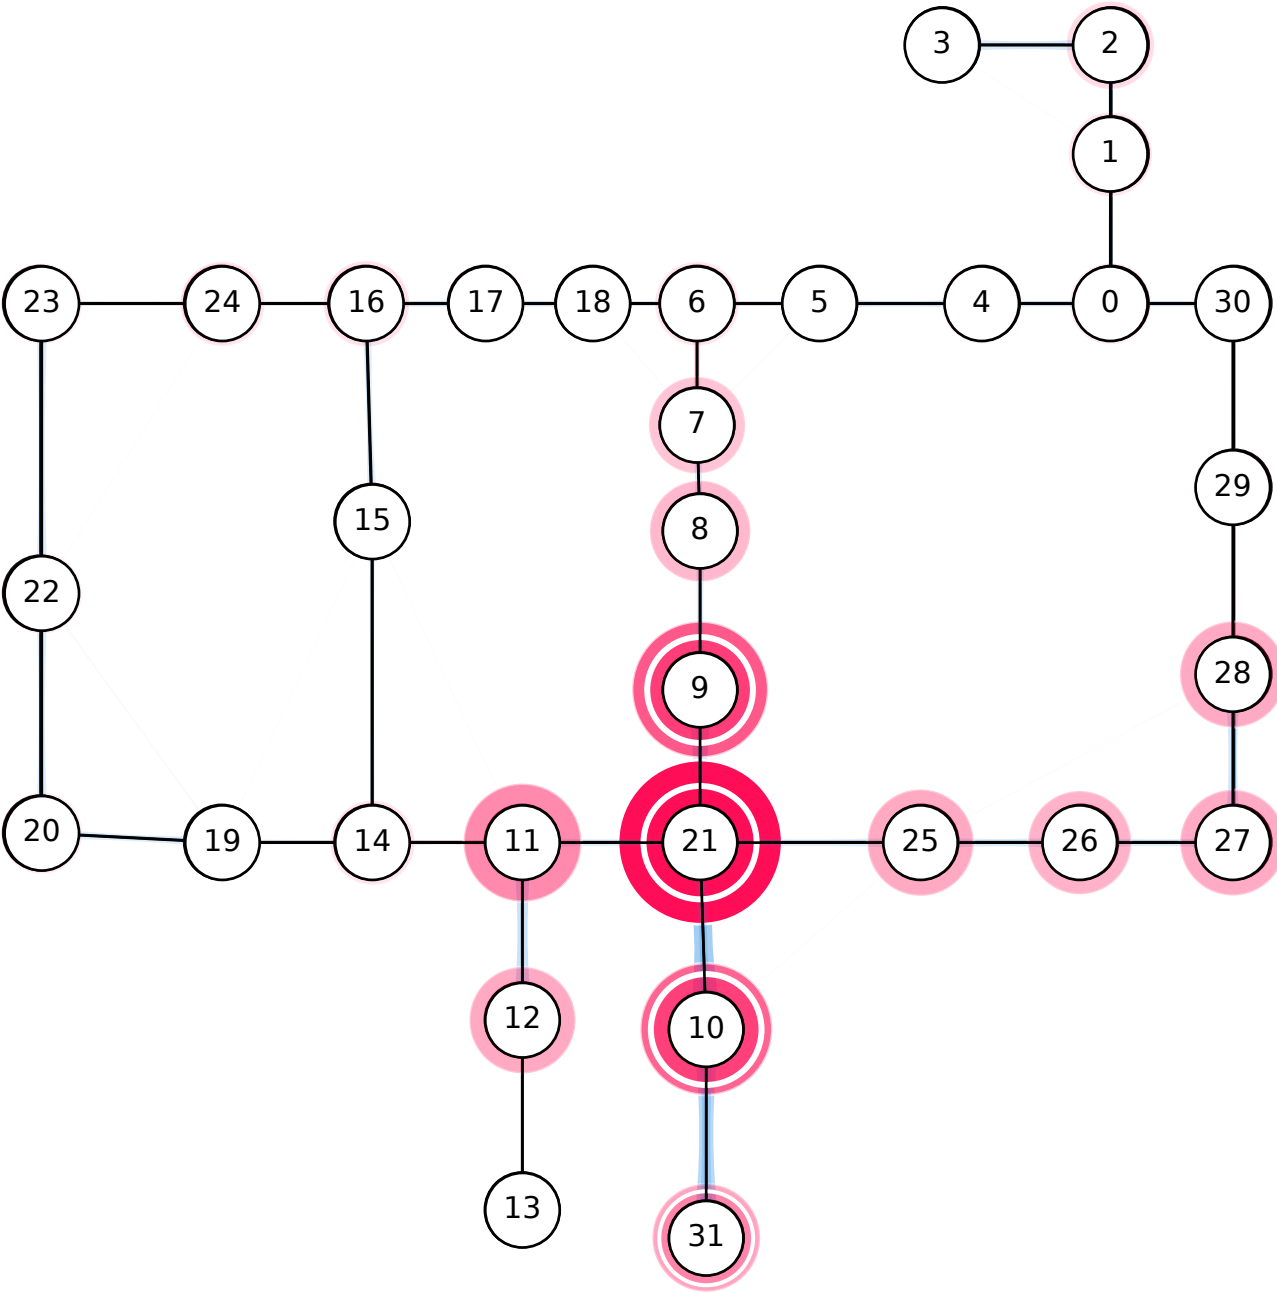

Supplement: supplementary_material [file attachment]

SV for PROTEINS with 2-layer GCN

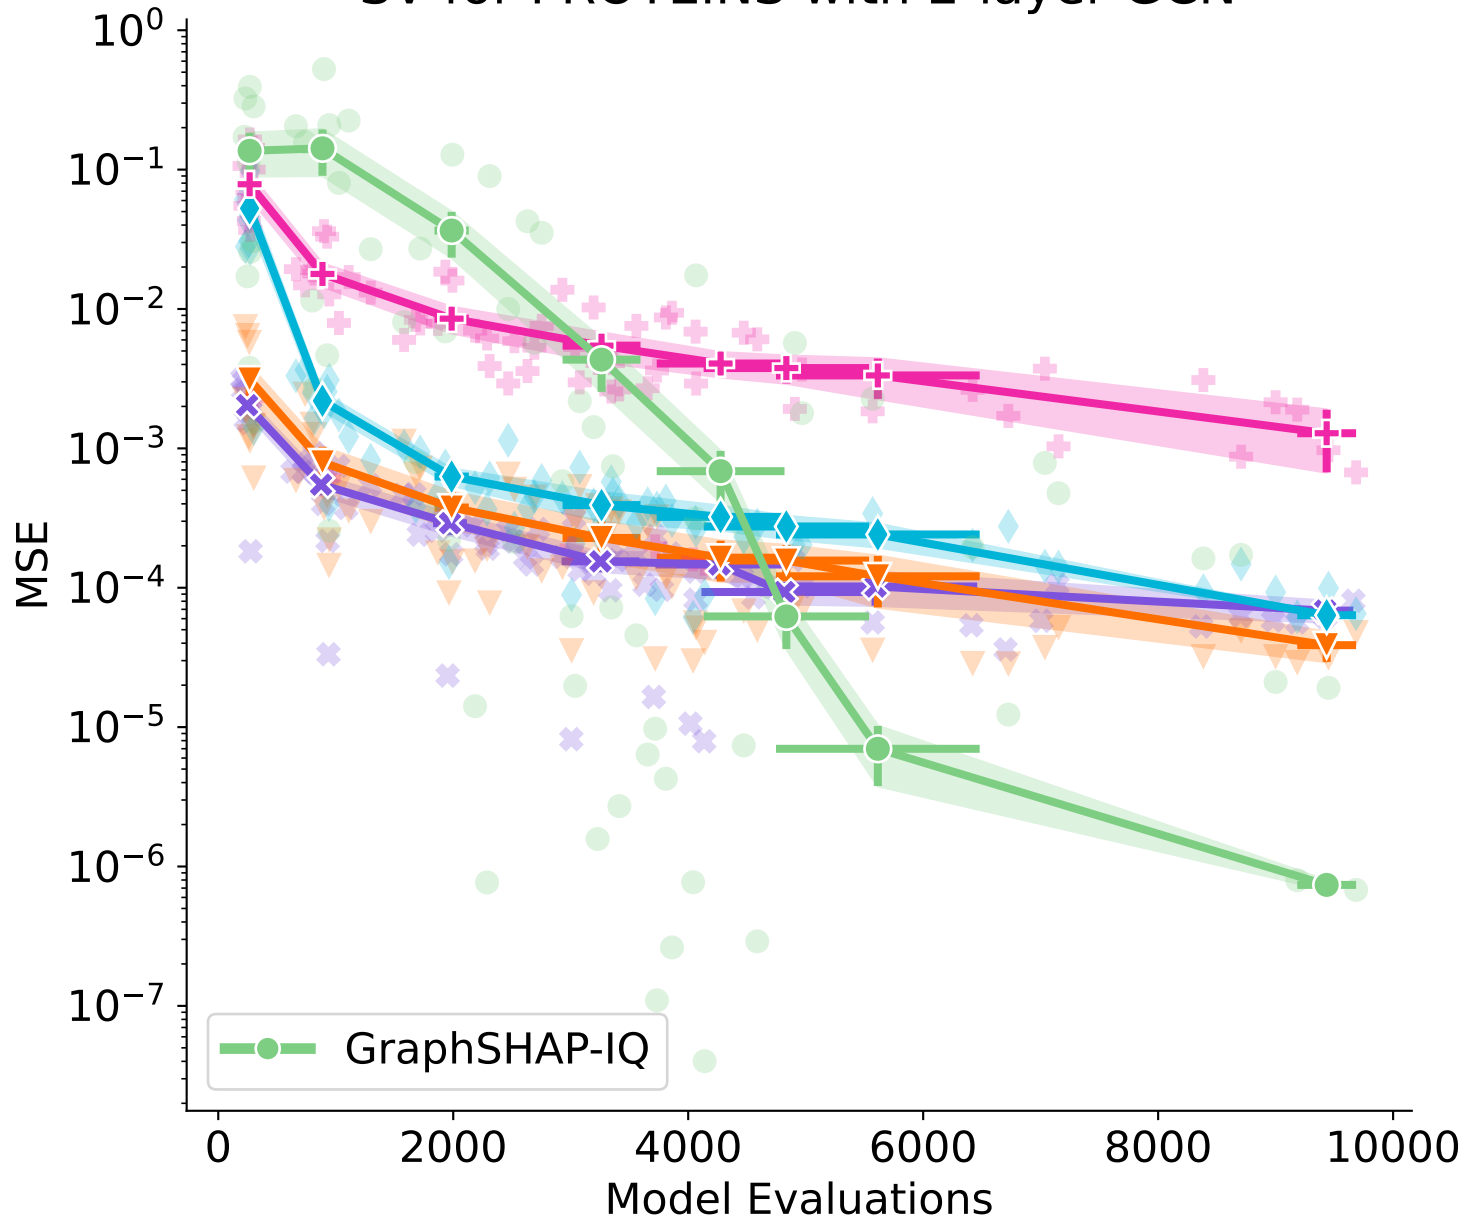

Supplement: supplementary_material [file attachment]

# Mutagenicity with 2-layer GIN

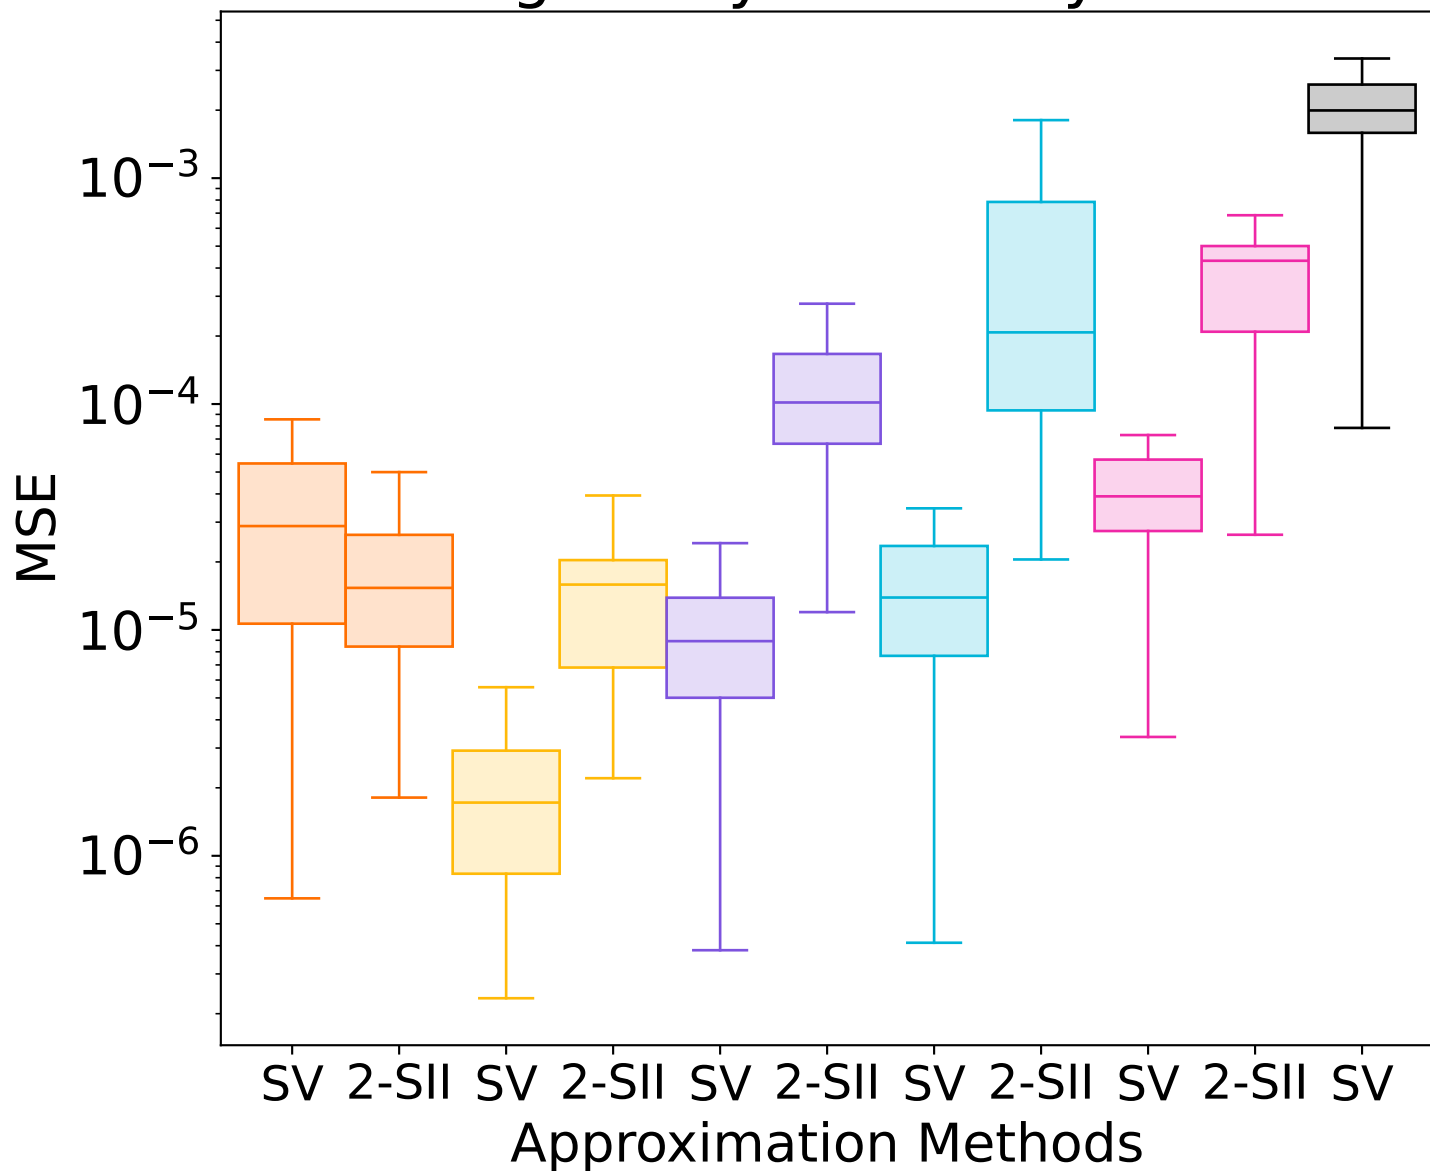

Supplement: supplementary_material [file attachment]

2-SII for BZR with 2-layer GCN

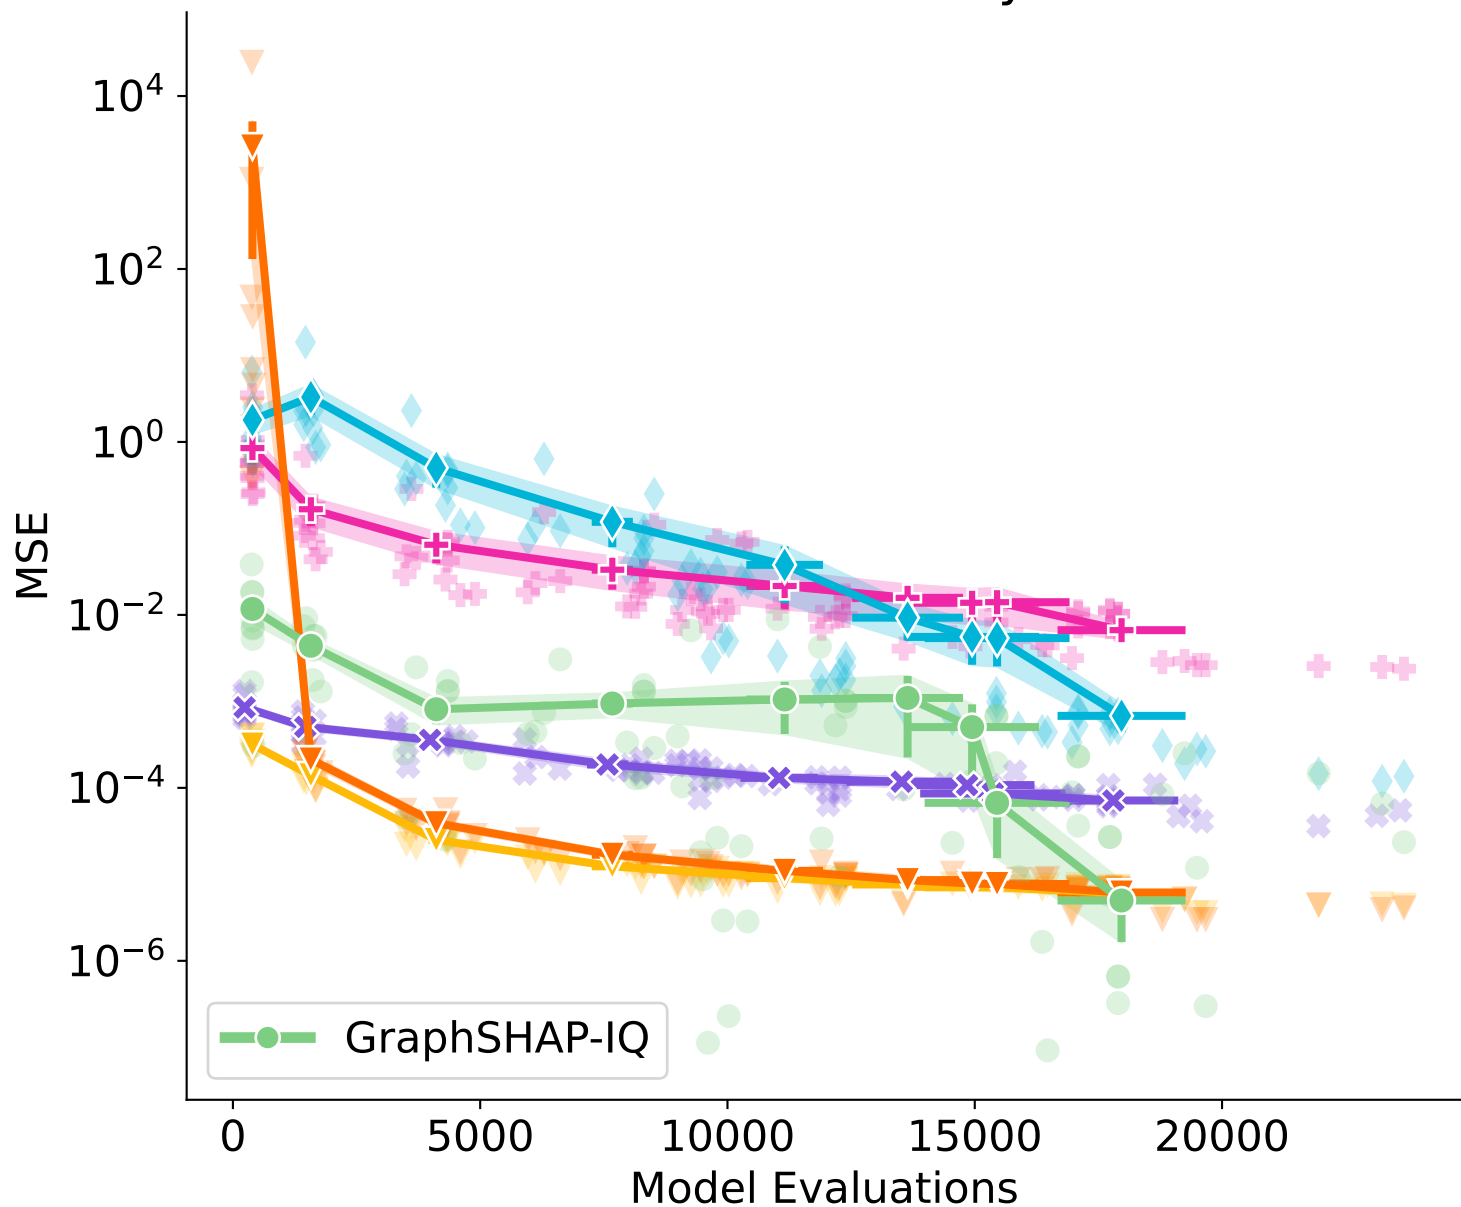

Supplement: supplementary_material [file attachment]

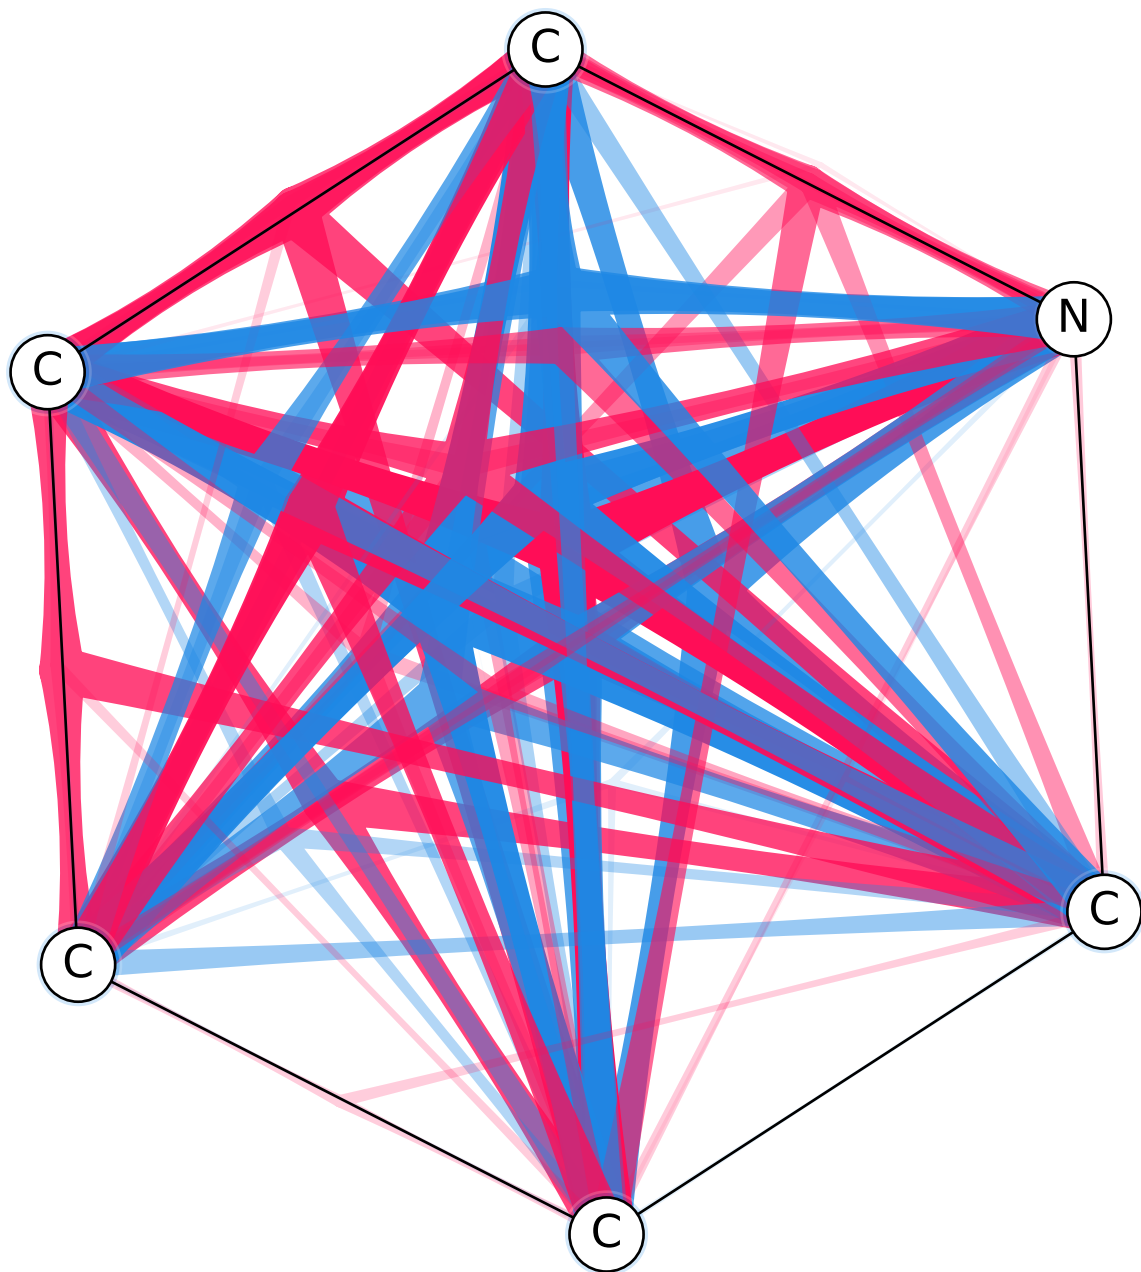

Supplement: supplementary_material [file attachment]

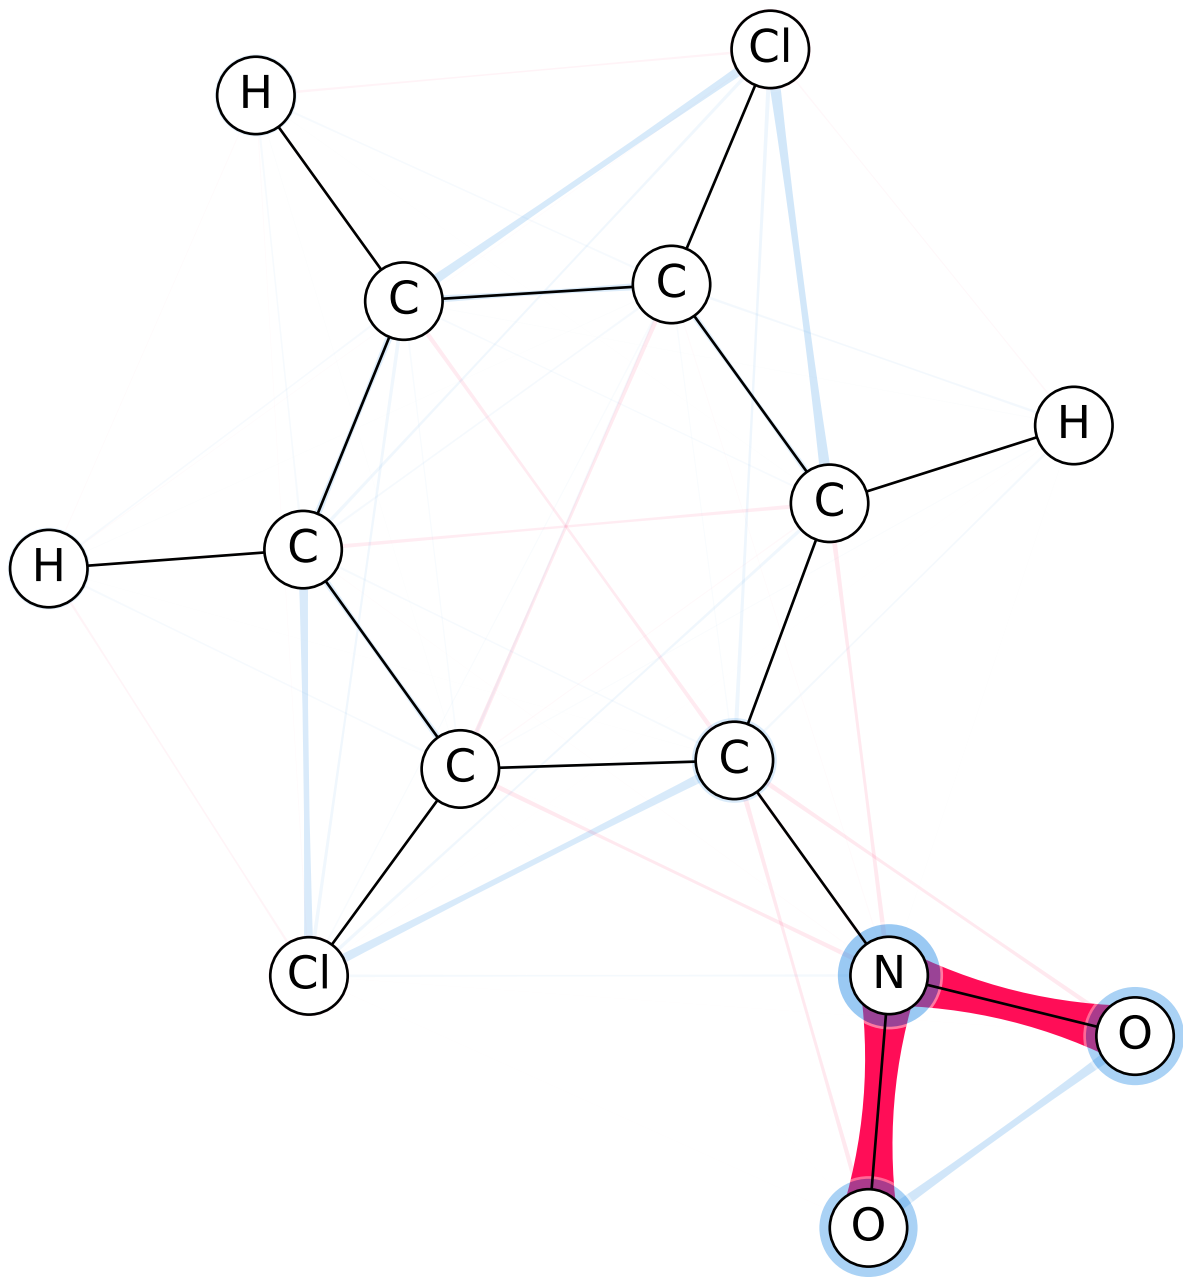

Supplement: supplementary_material [file attachment]

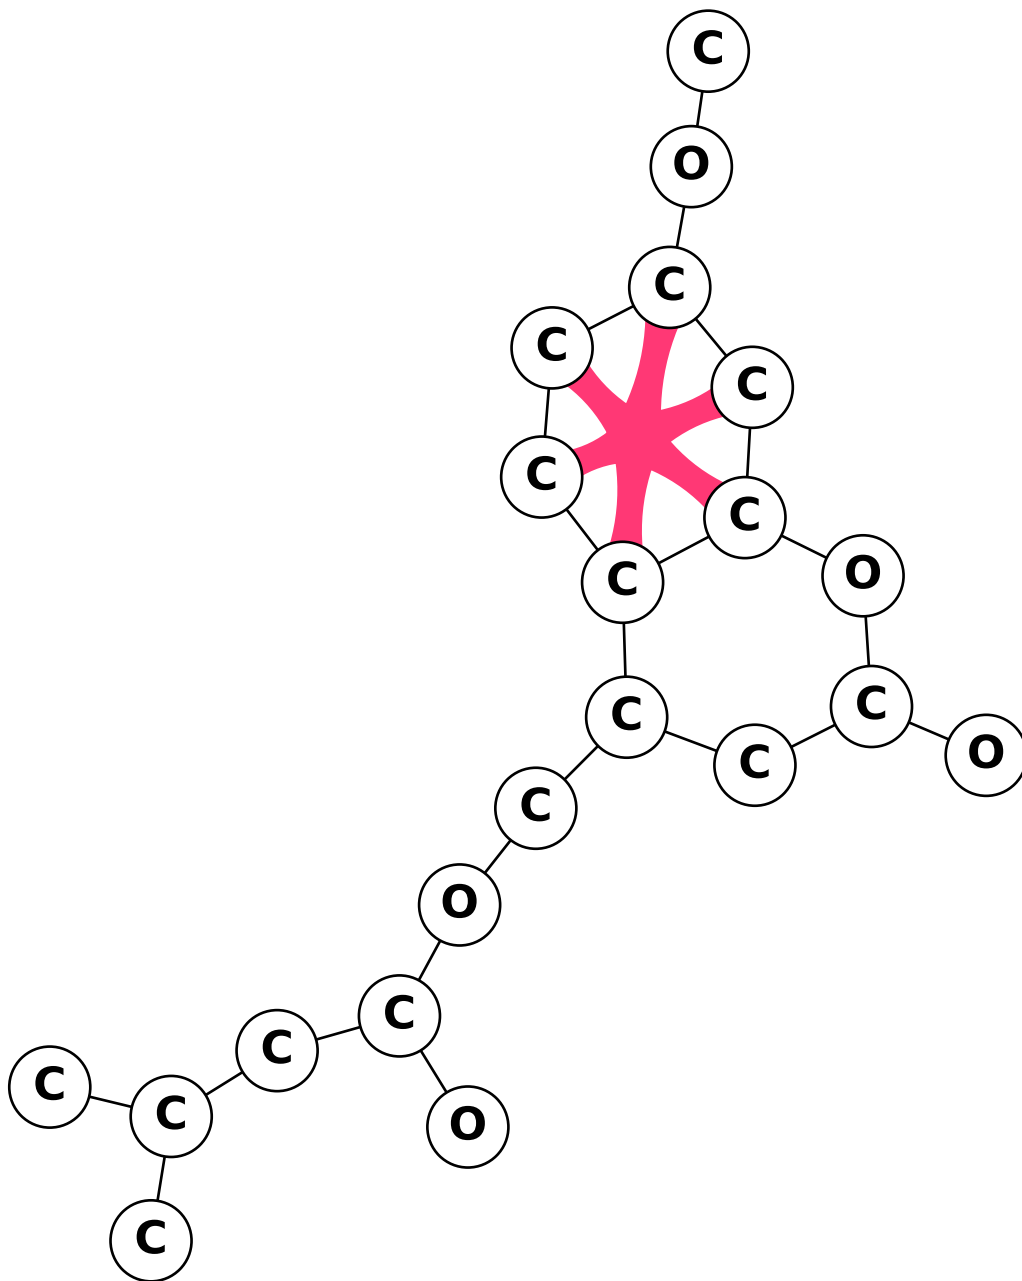

Supplement: supplementary_material [file attachment]

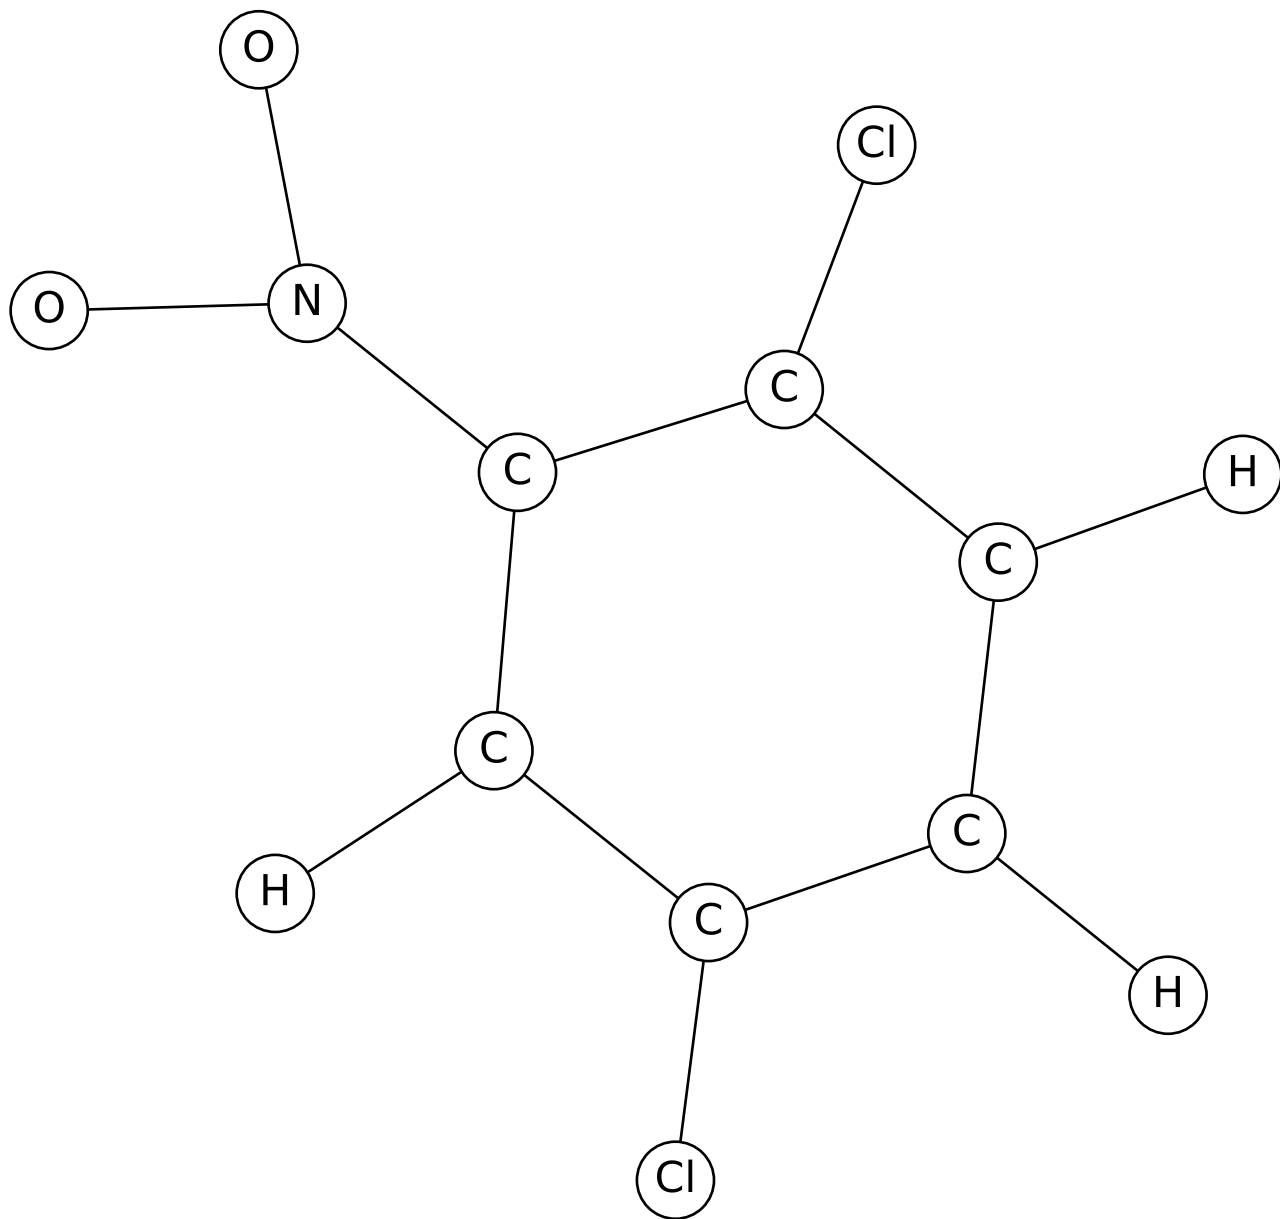

Supplement: supplementary_material [file attachment]

## 2-SII for PROTEINS with 2-layer GCN

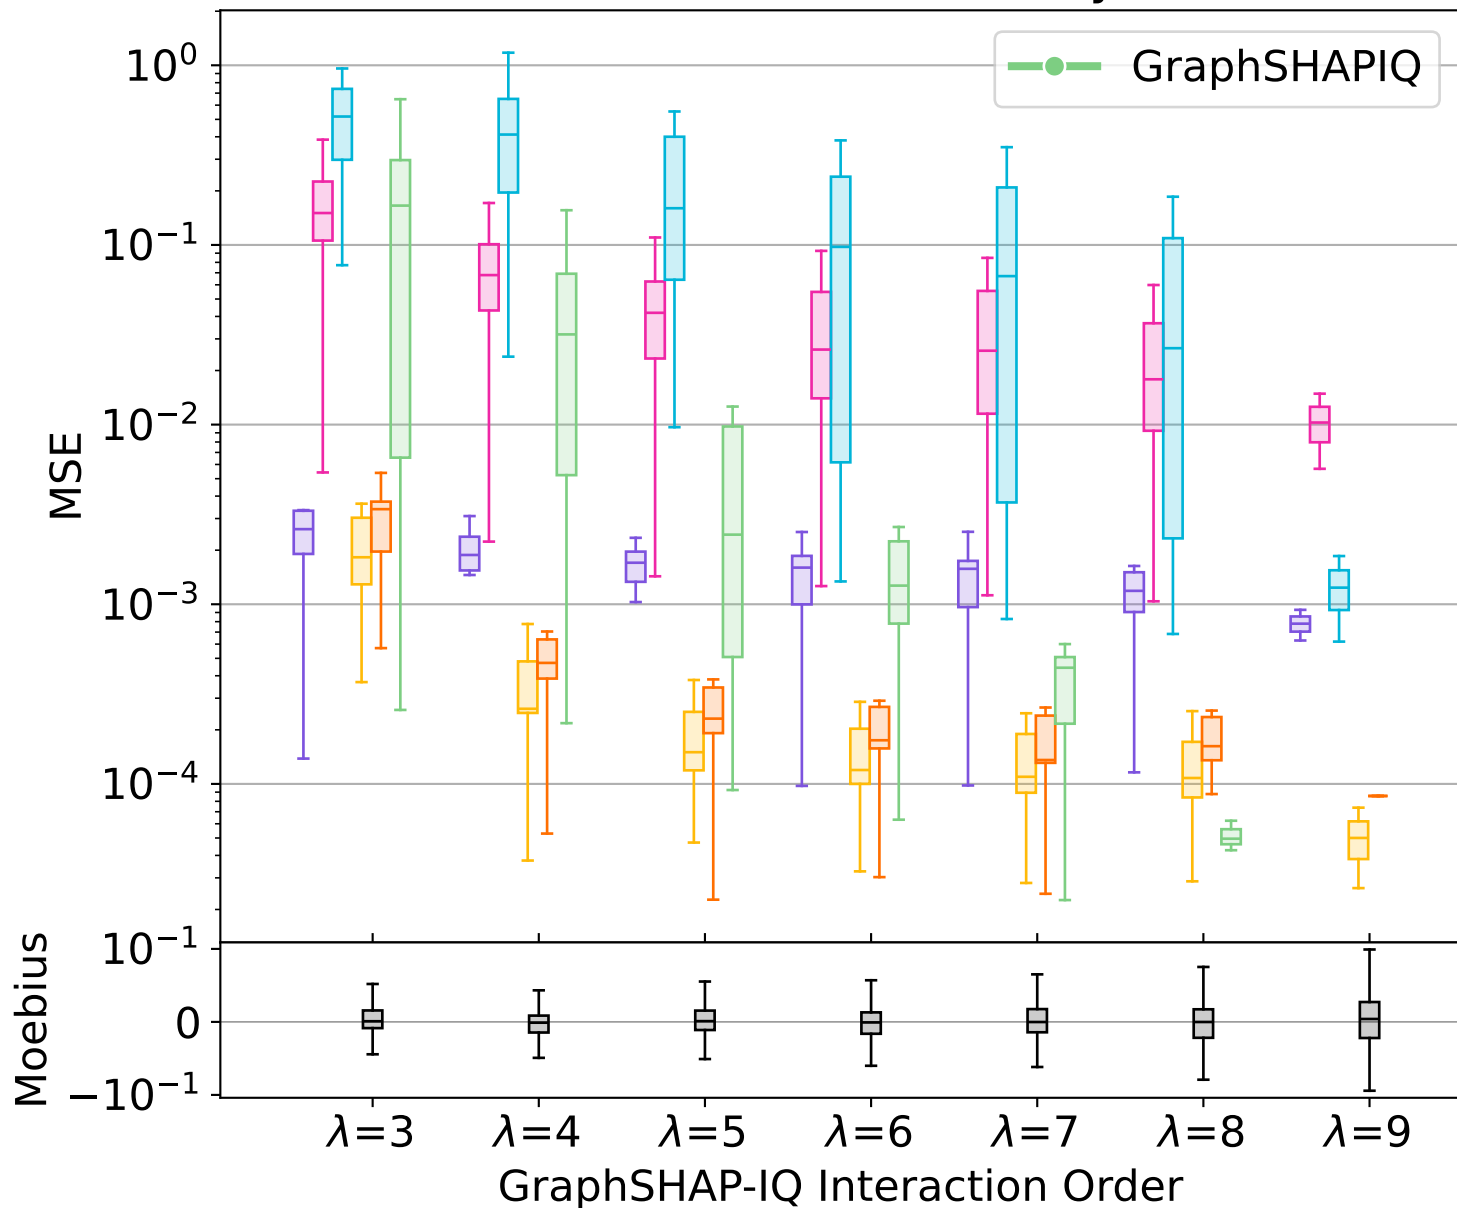

Supplement: supplementary_material [file attachment]

2-SII for Mutagenicity with 2-layer GCN

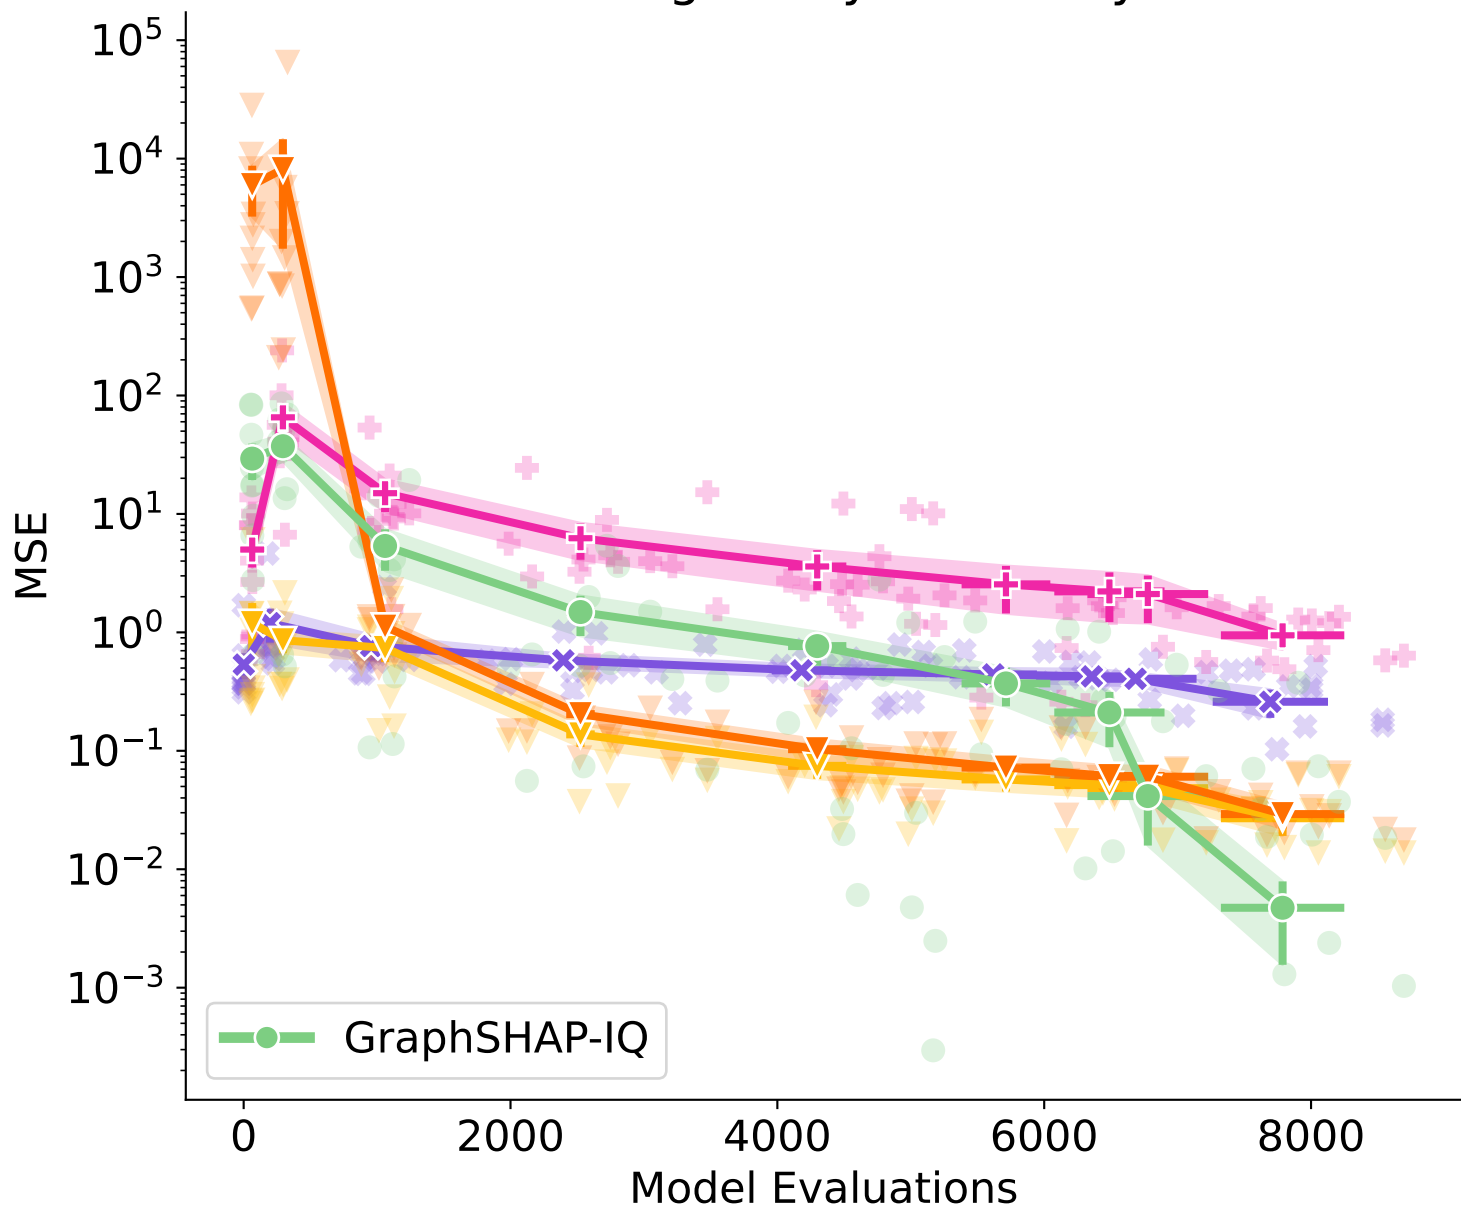

Supplement: supplementary_material [file attachment]

2-SII for BZR with 2-layer GIN

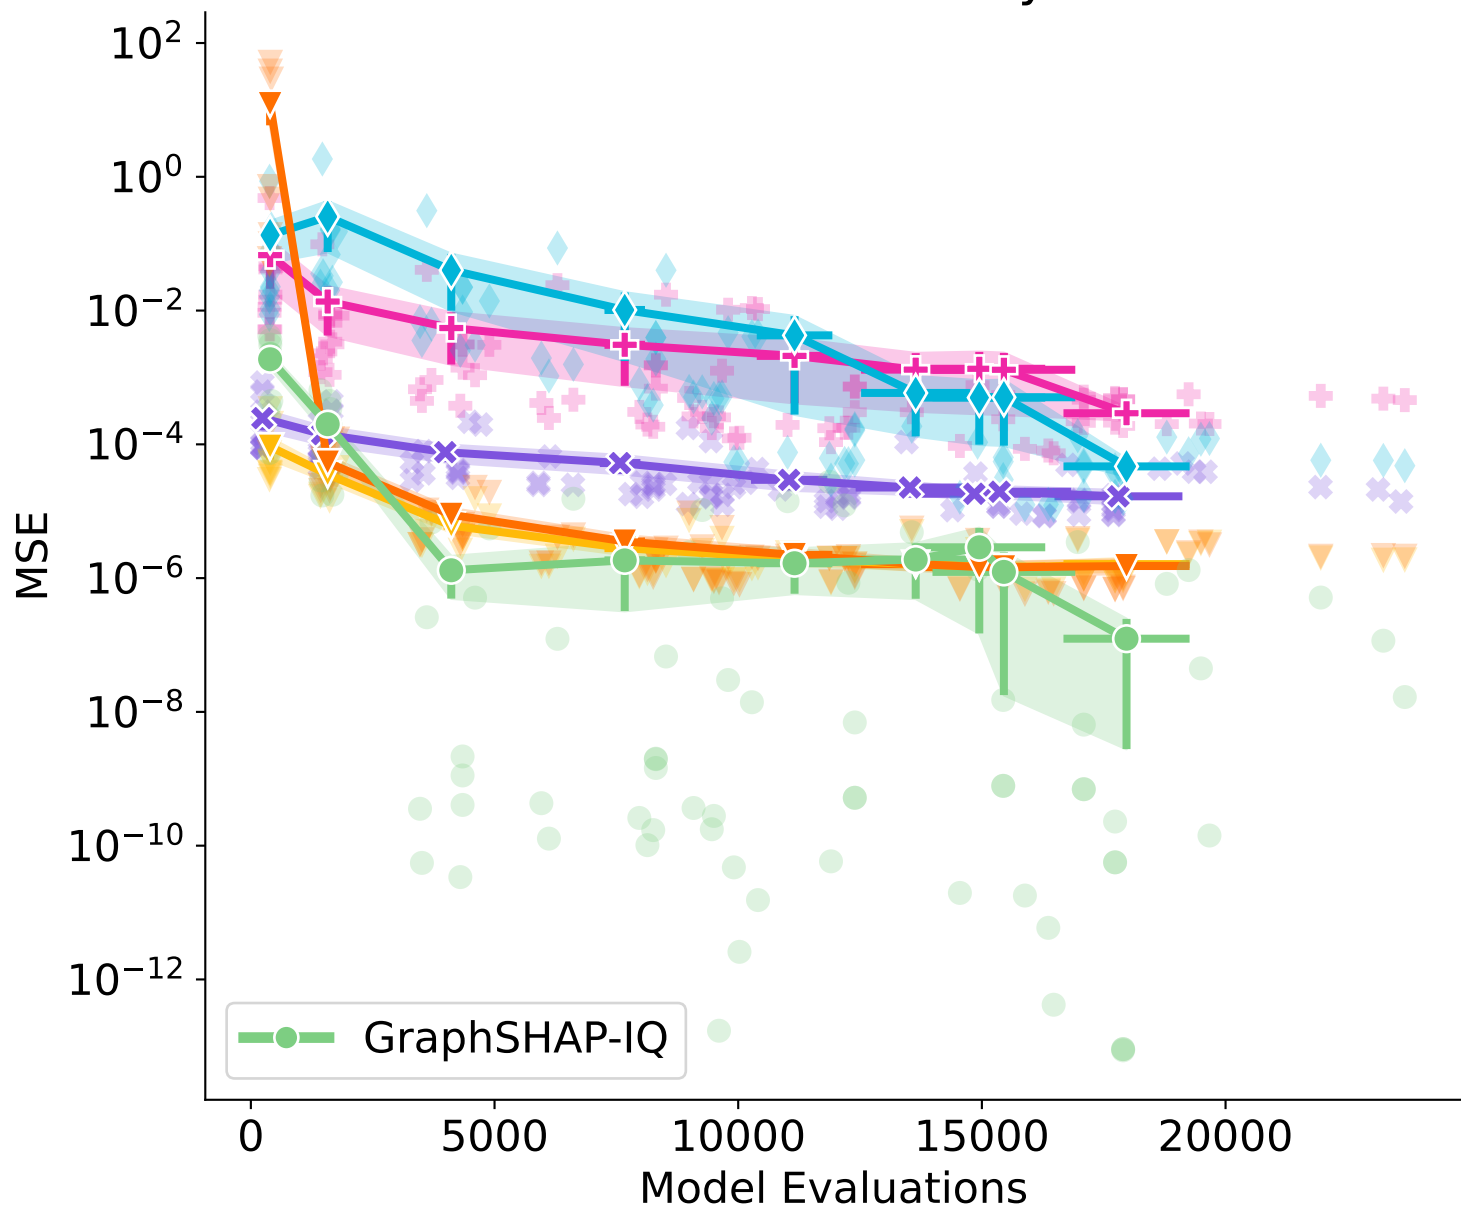

Supplement: supplementary_material [file attachment]

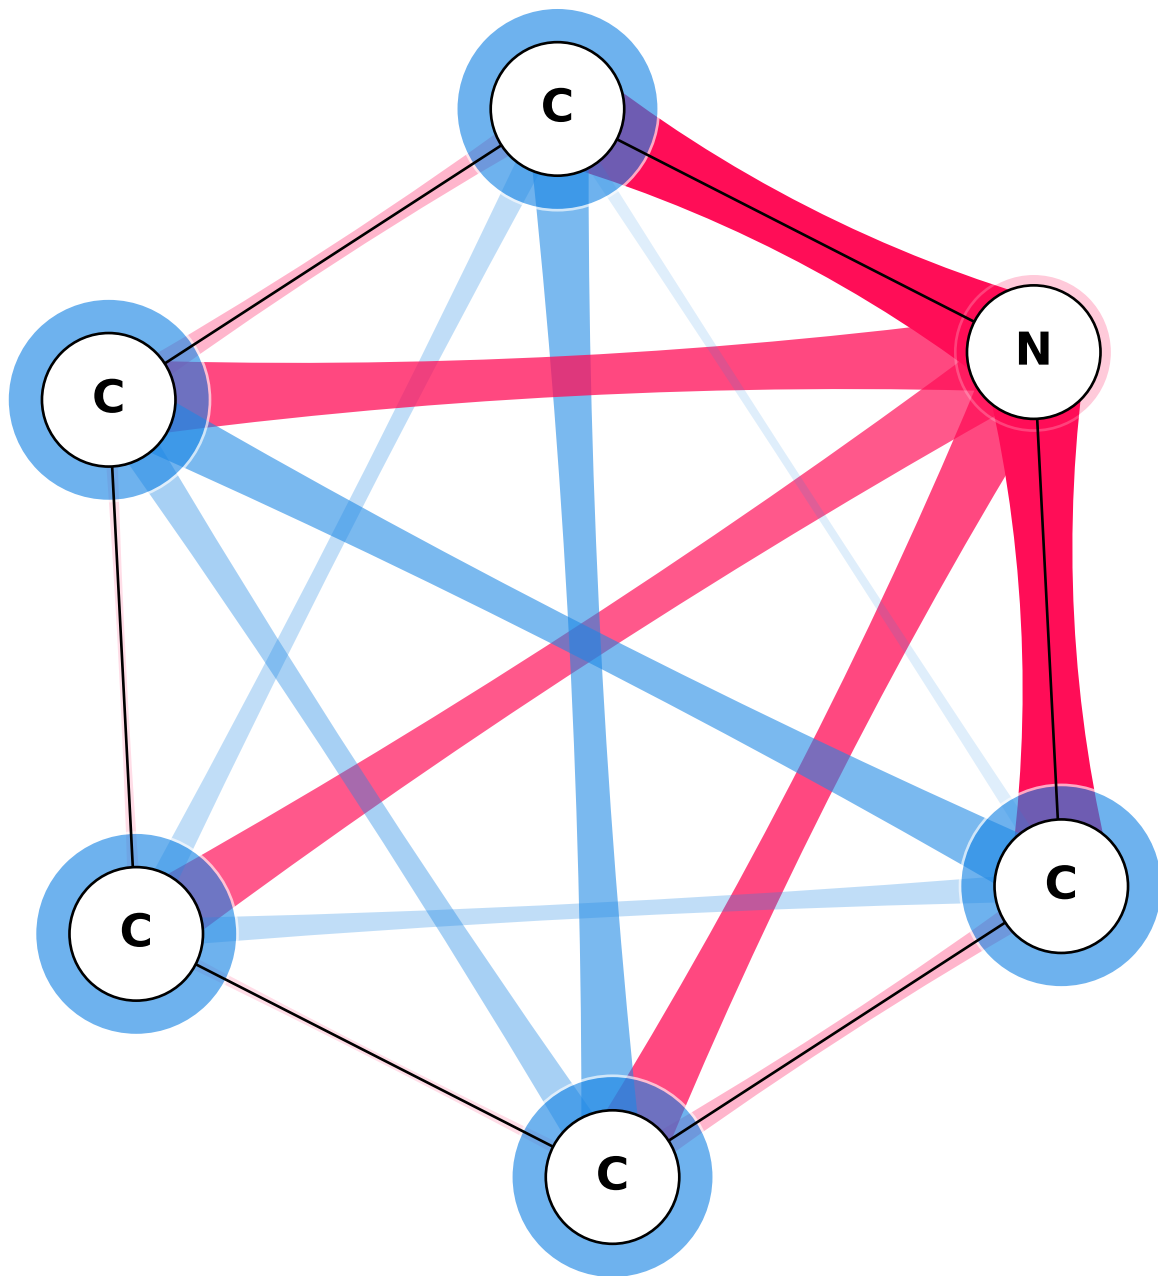

Supplement: supplementary_material [file attachment]

# SV for Mutagenicity with 2-layer GCN

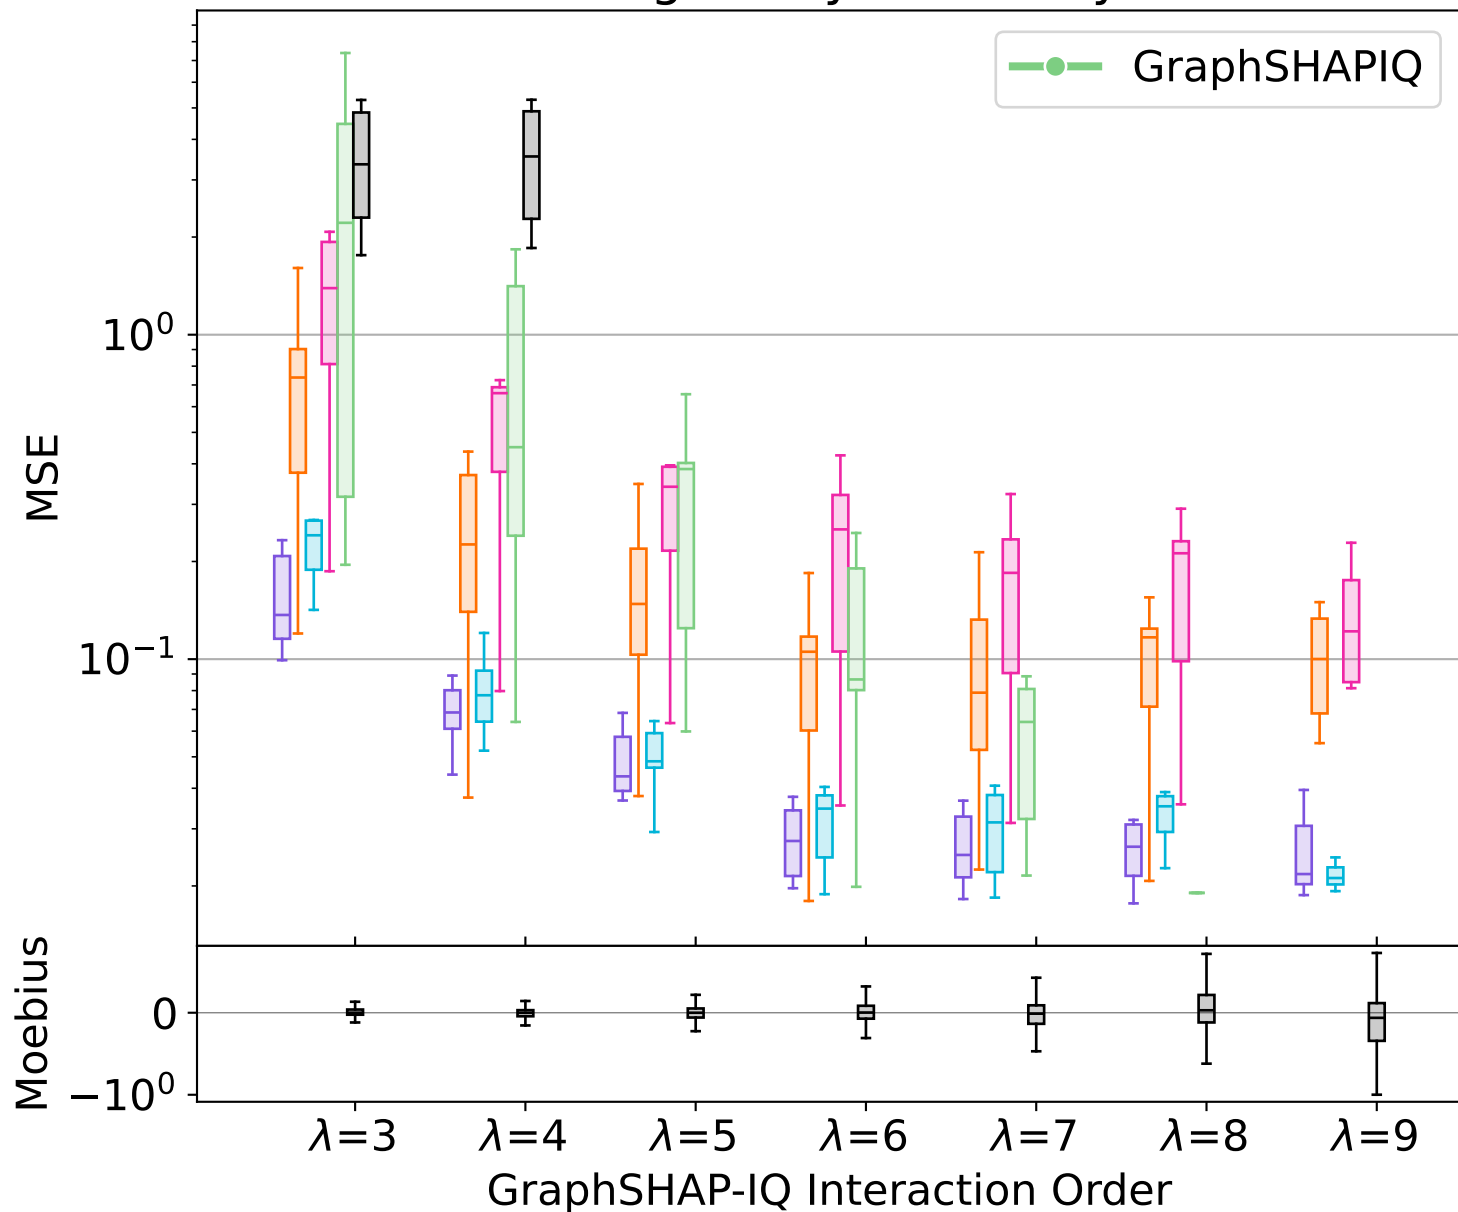

Supplement: supplementary_material [file attachment]

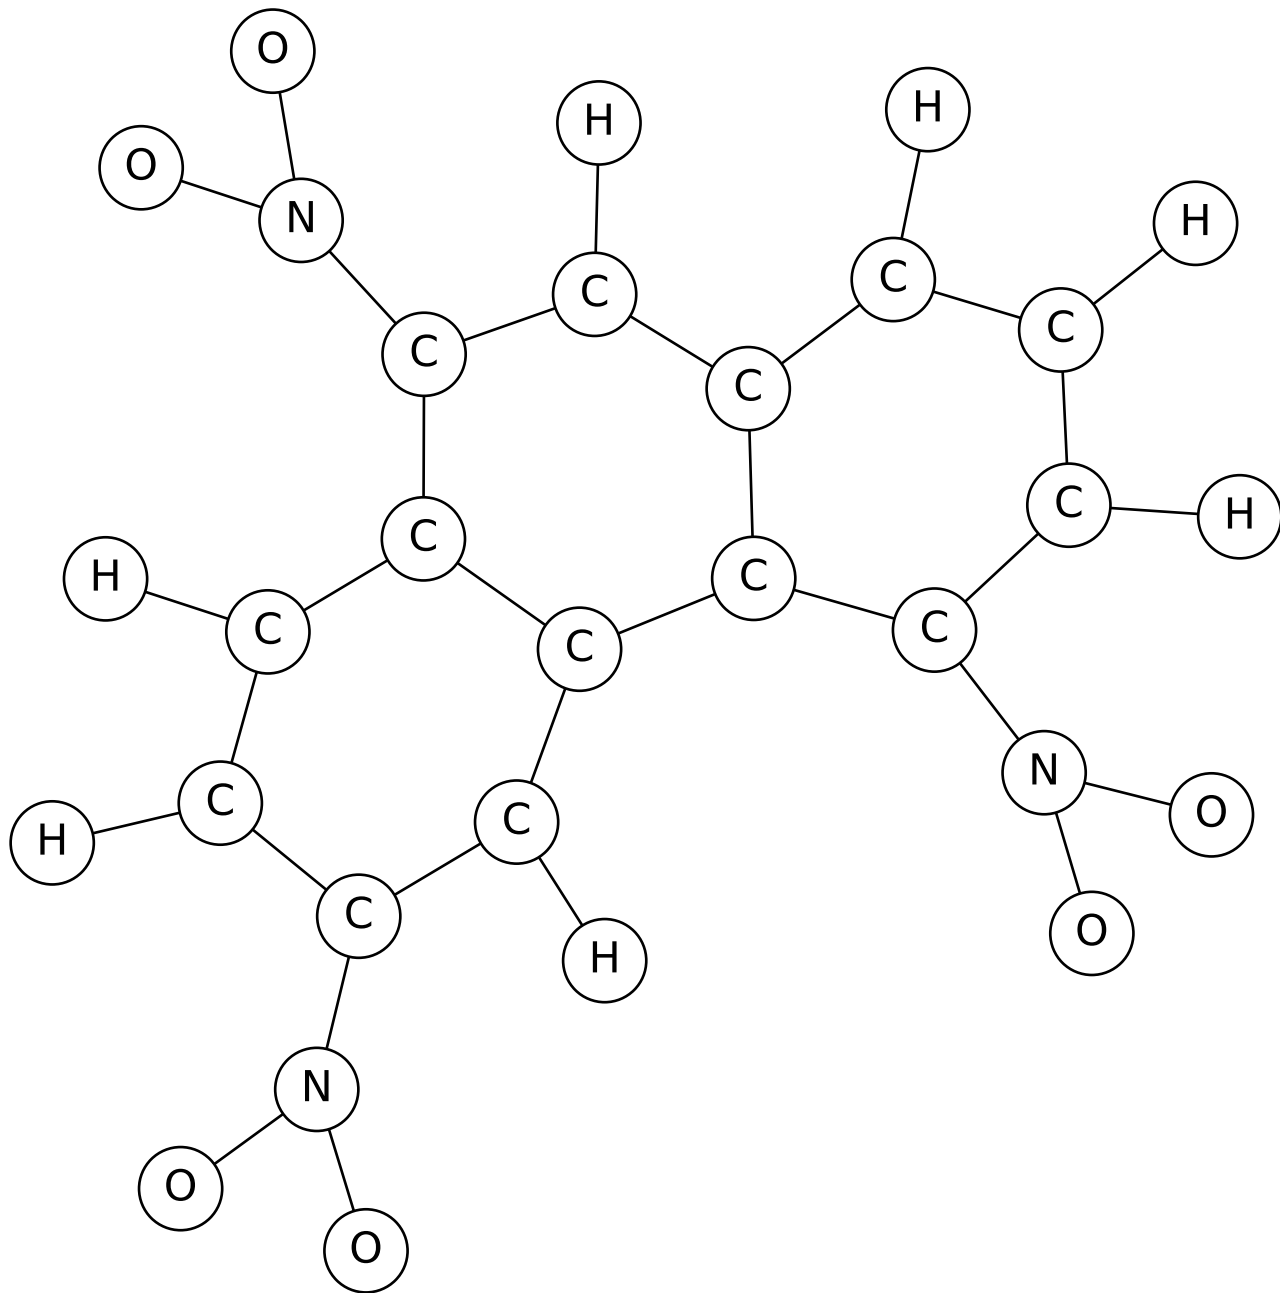

Supplement: supplementary_material [file attachment]

## 2-SII for PROTEINS with 2-layer GIN

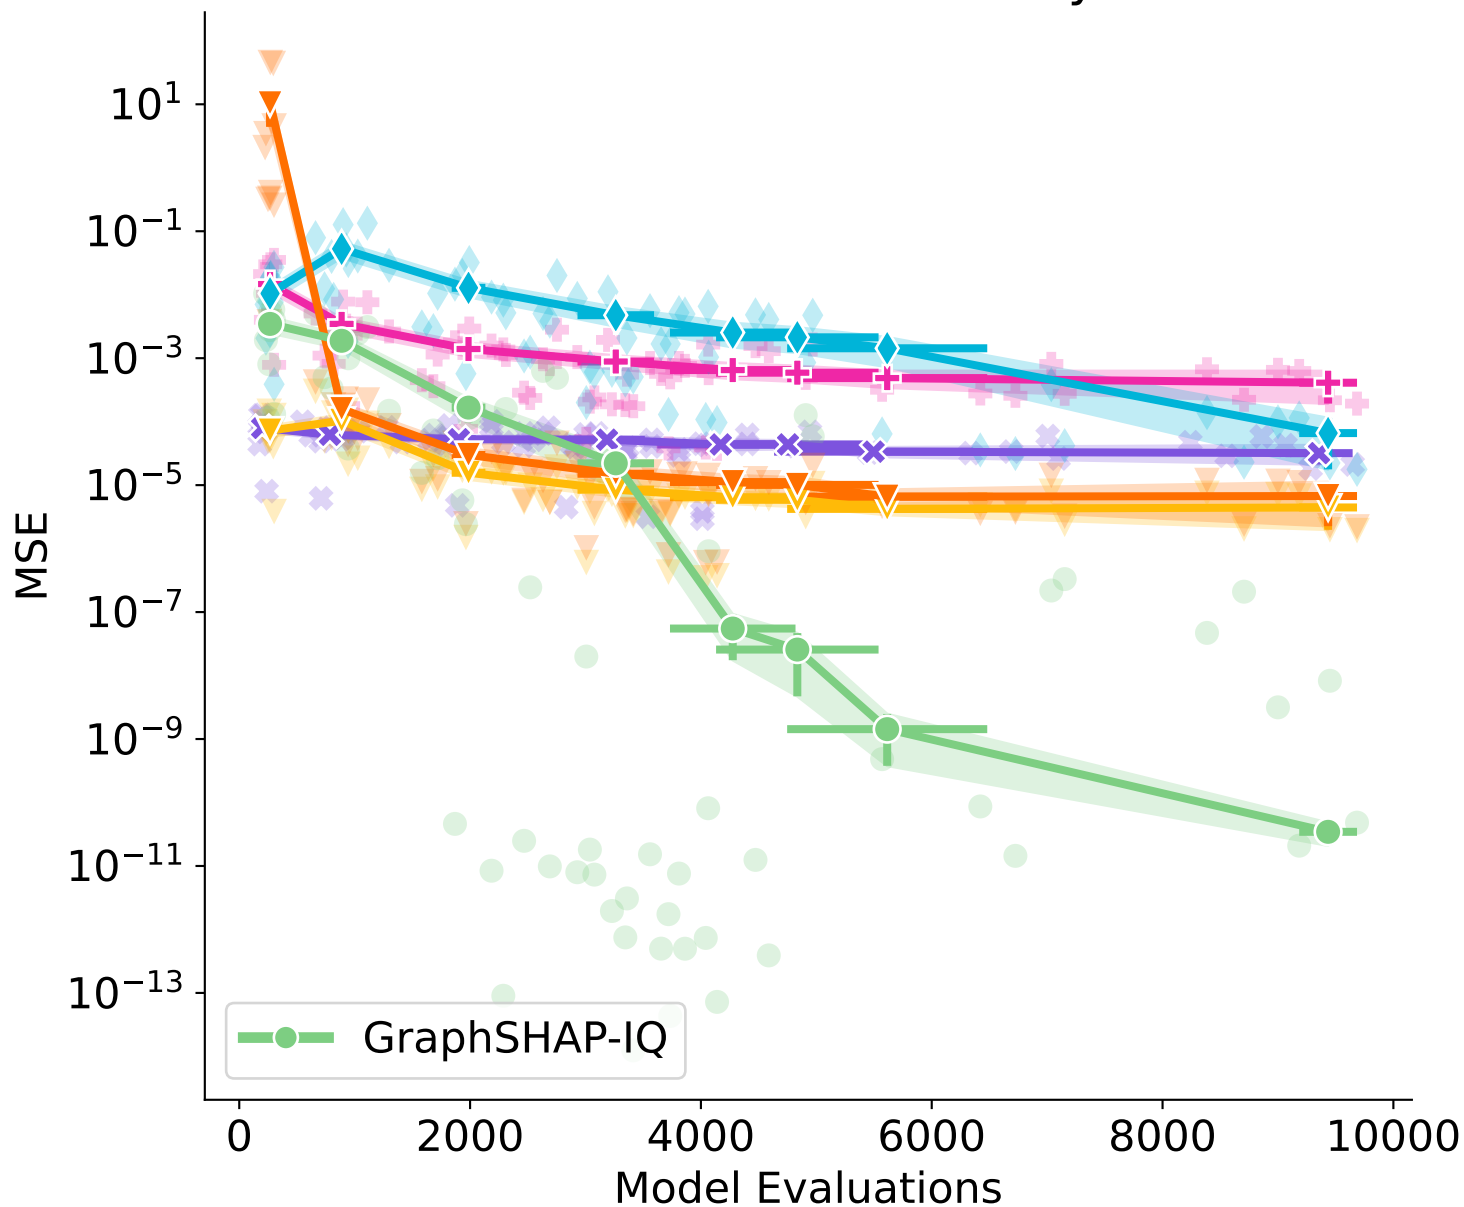

Supplement: supplementary_material [file attachment]

2-SII for PROTEINS with 2-layer GCN

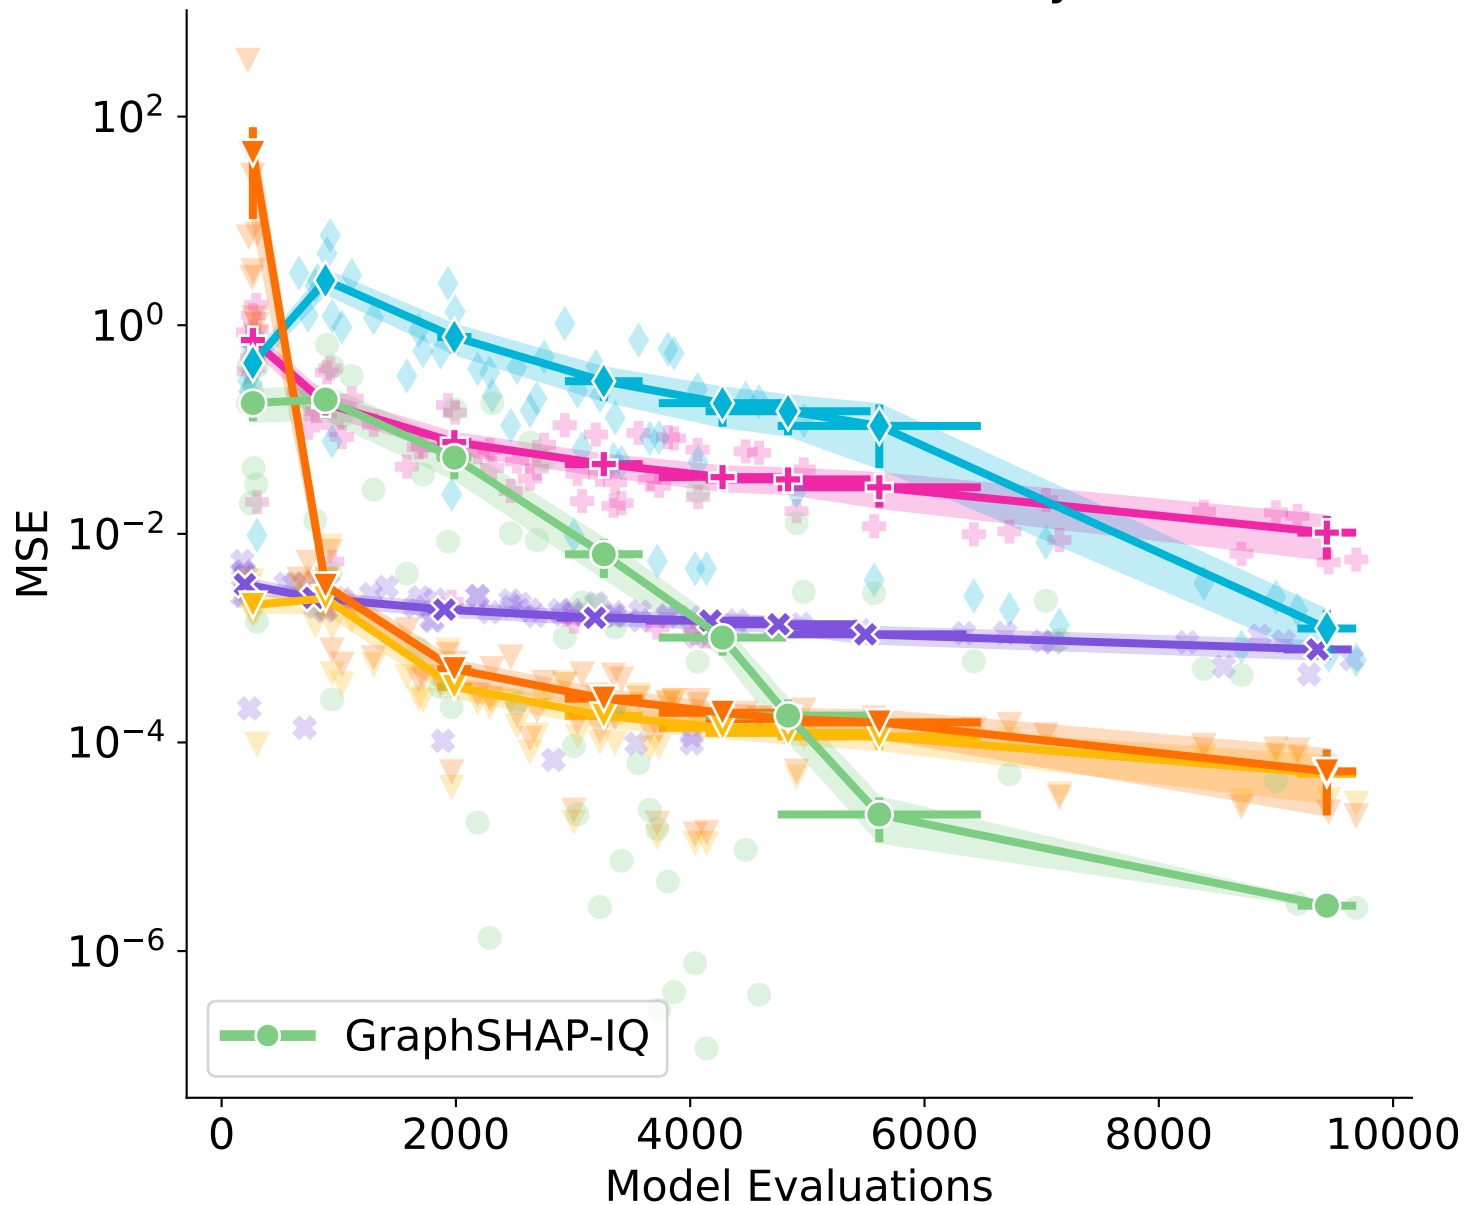

Supplement: supplementary_material [file attachment]

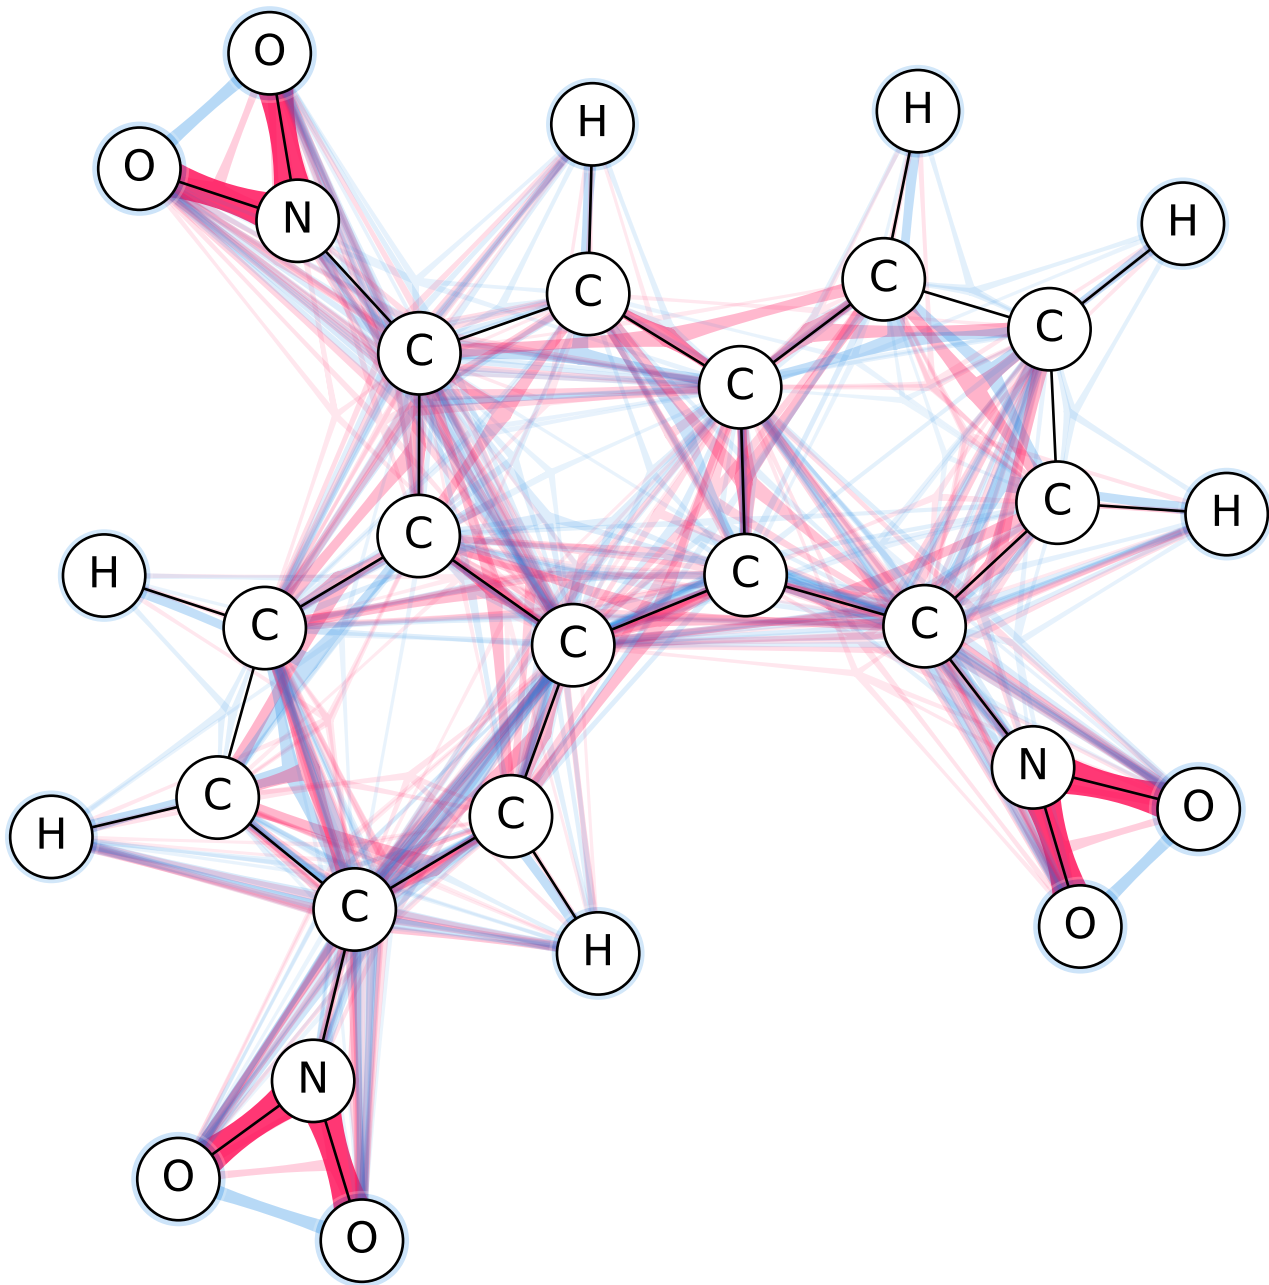

Supplement: supplementary_material [file attachment]

SV for PROTEINS with 2-layer GAT

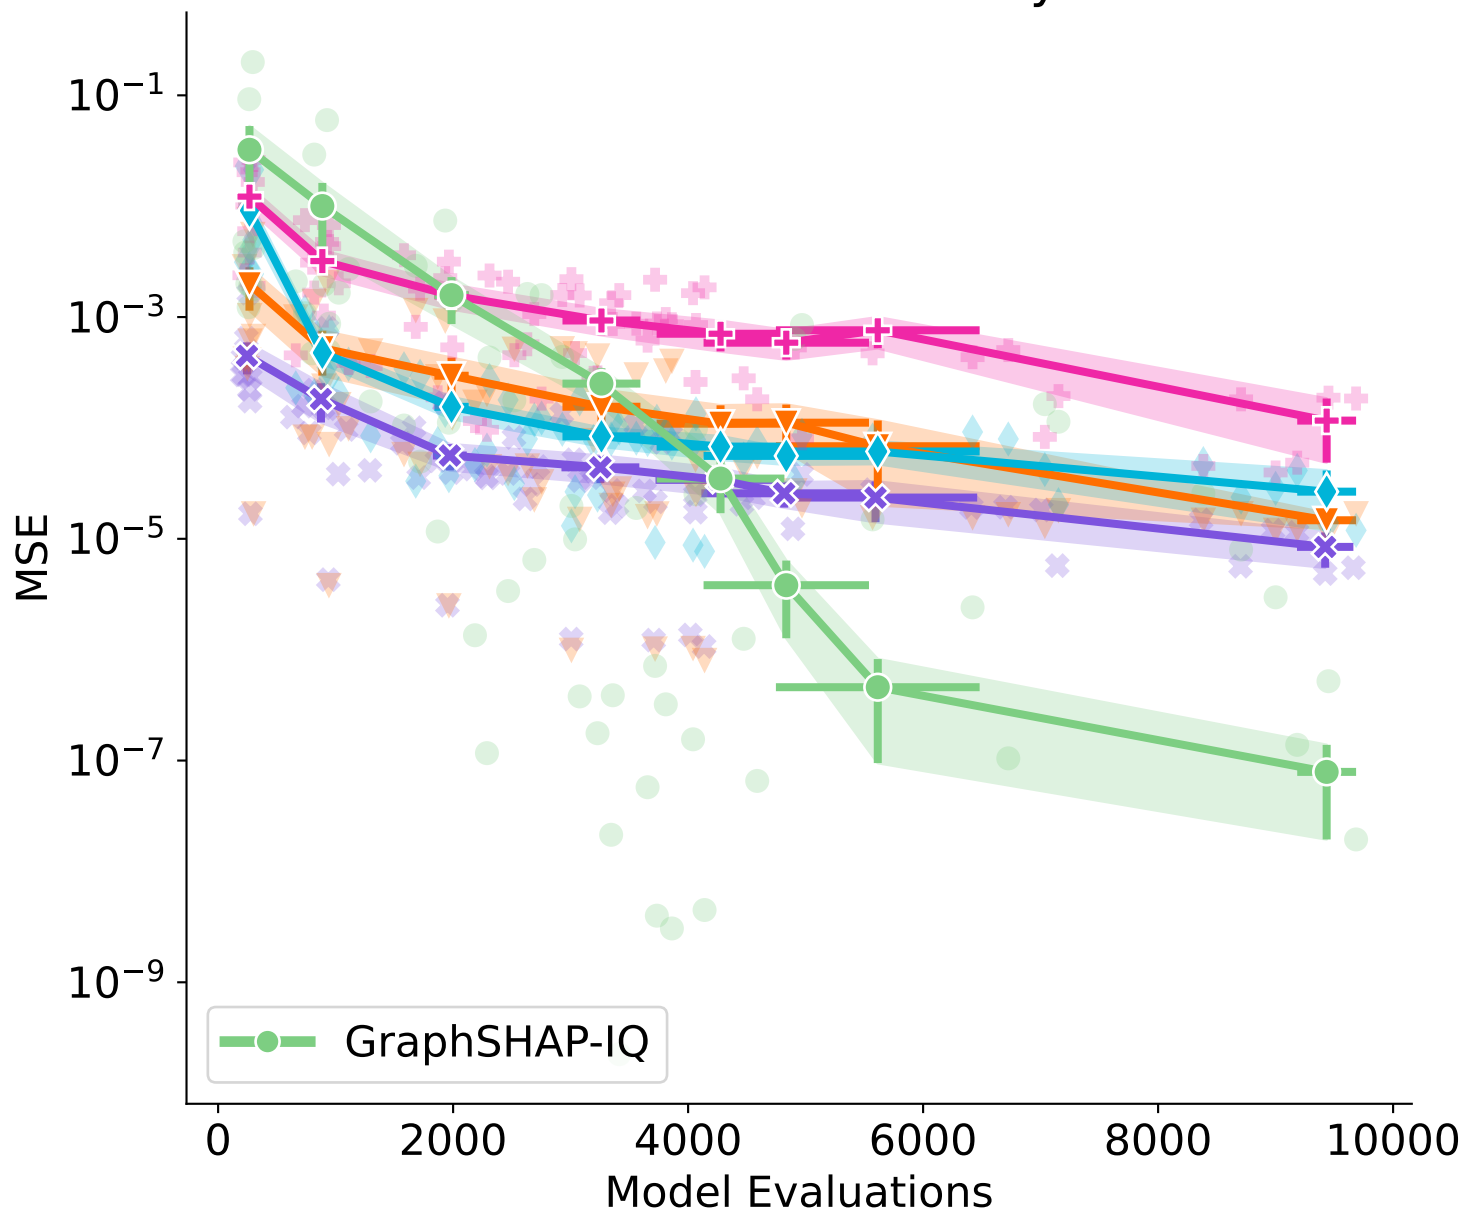

Supplement: supplementary_material [file attachment]

## 2-SII for PROTEINS with 2-layer GIN

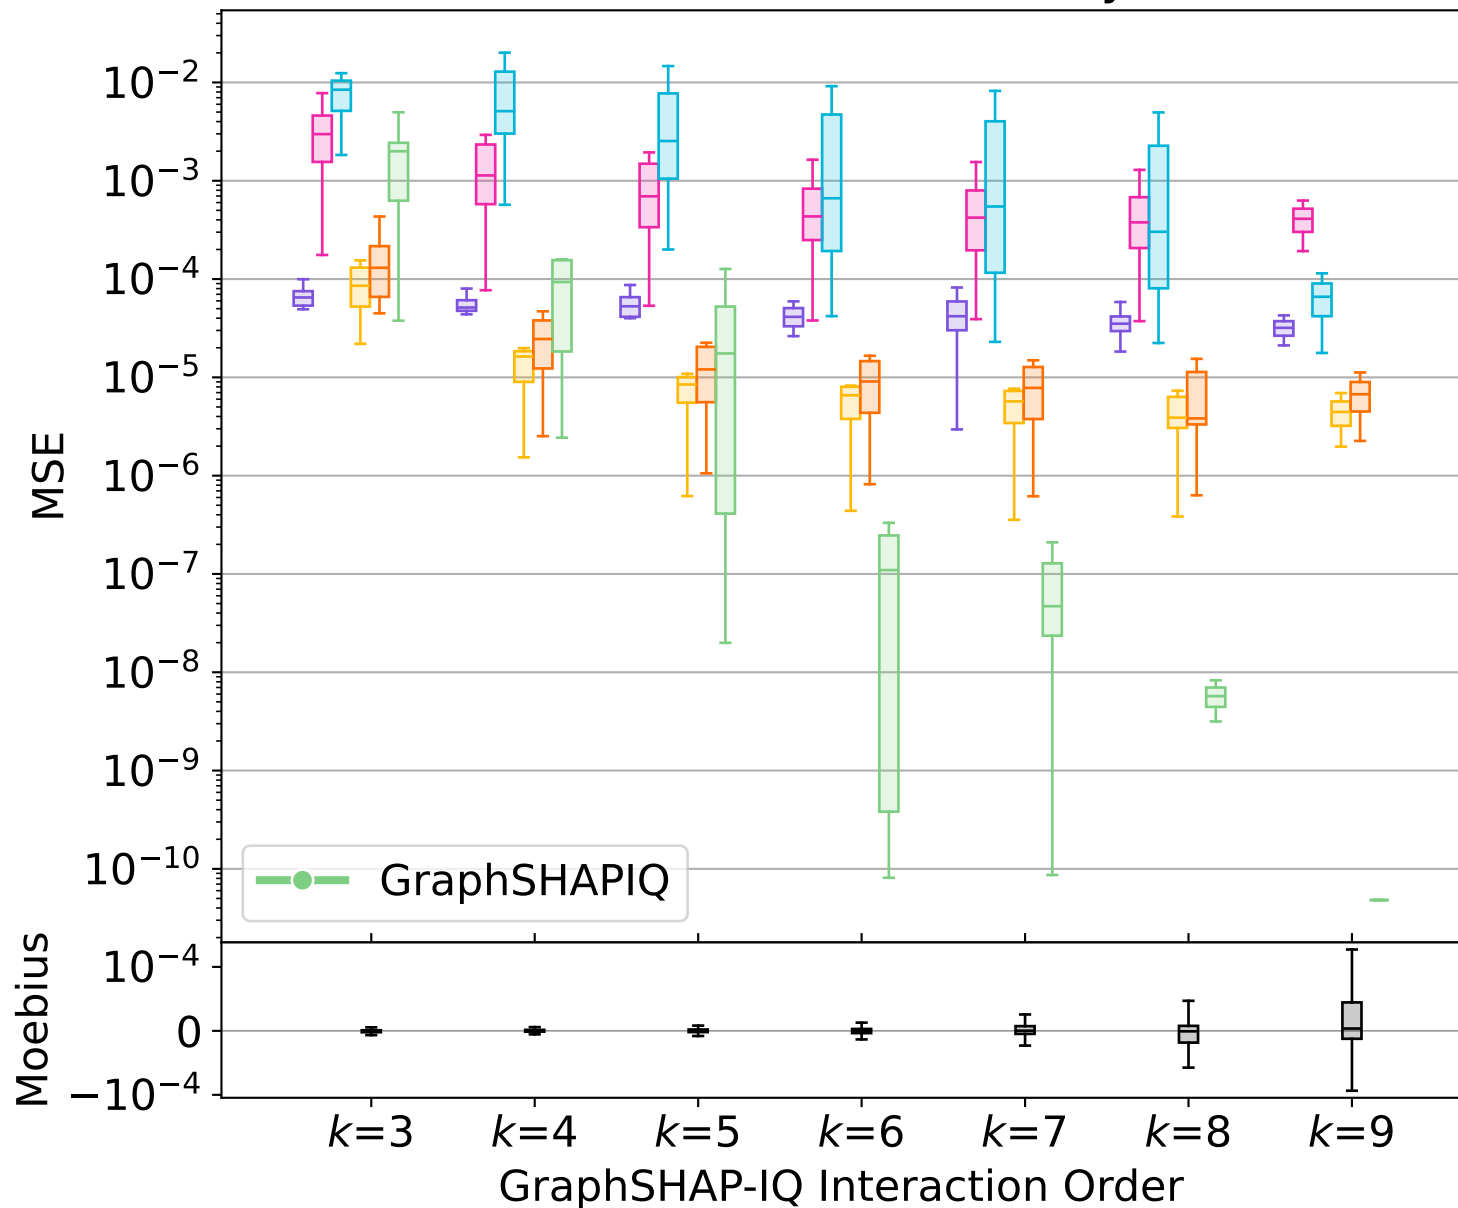

Supplement: supplementary_material [file attachment]

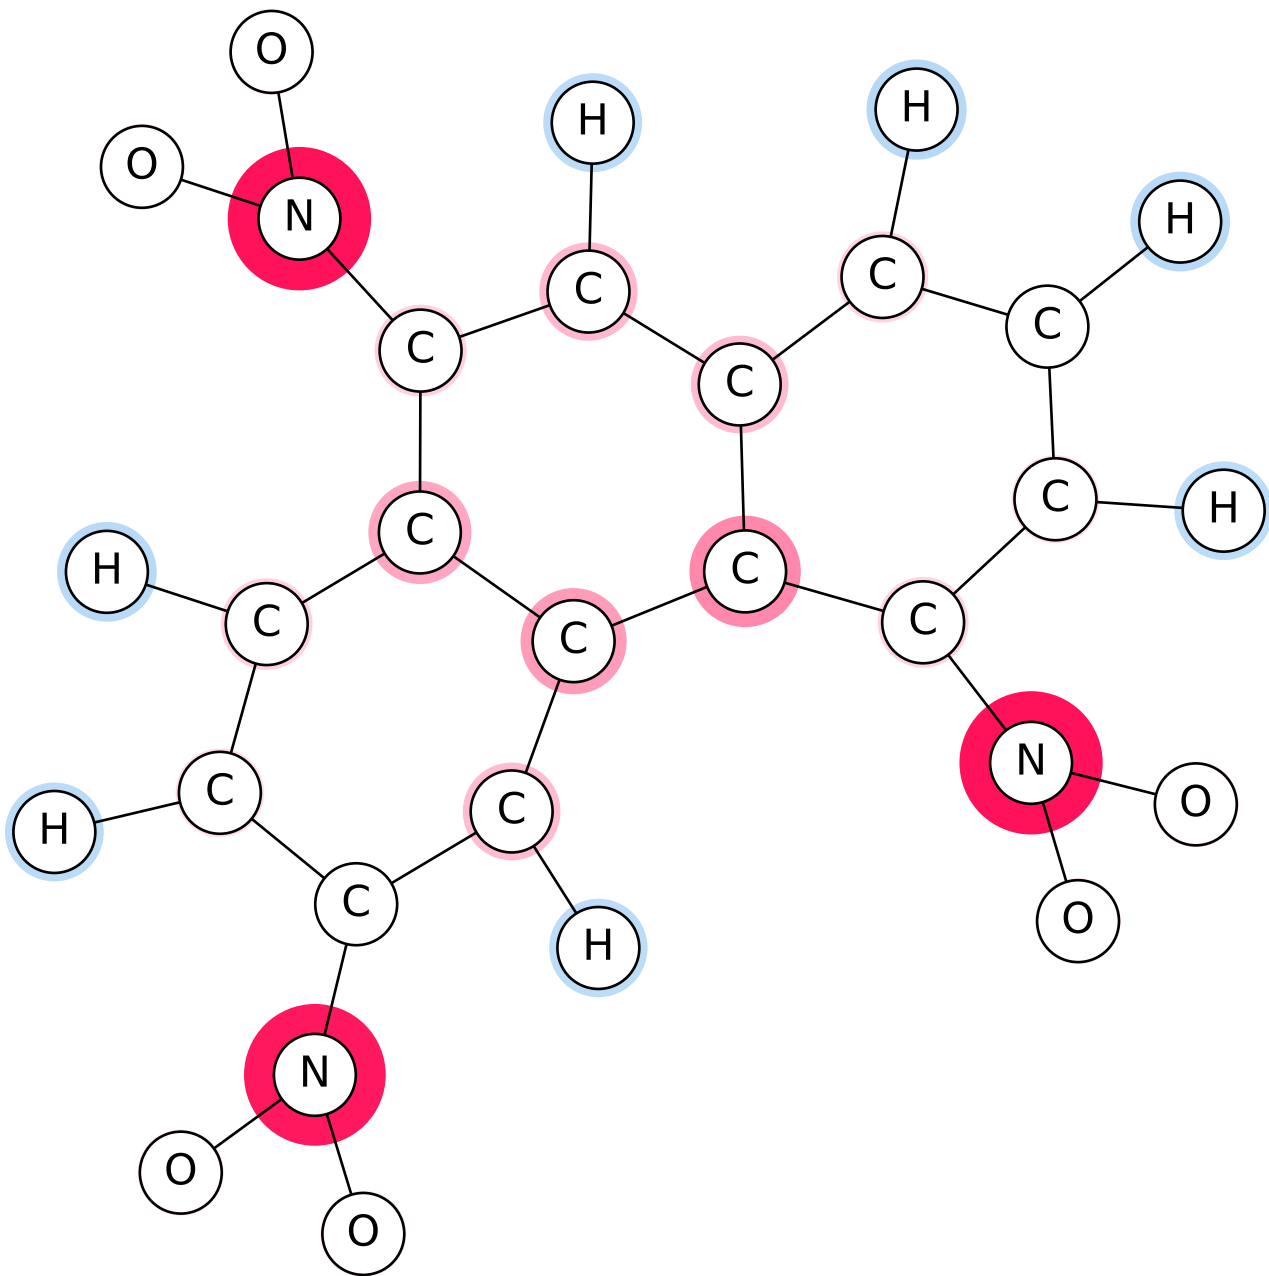

Supplement: supplementary_material [file attachment]

## 2-SII for PROTEINS with 2-layer GCN

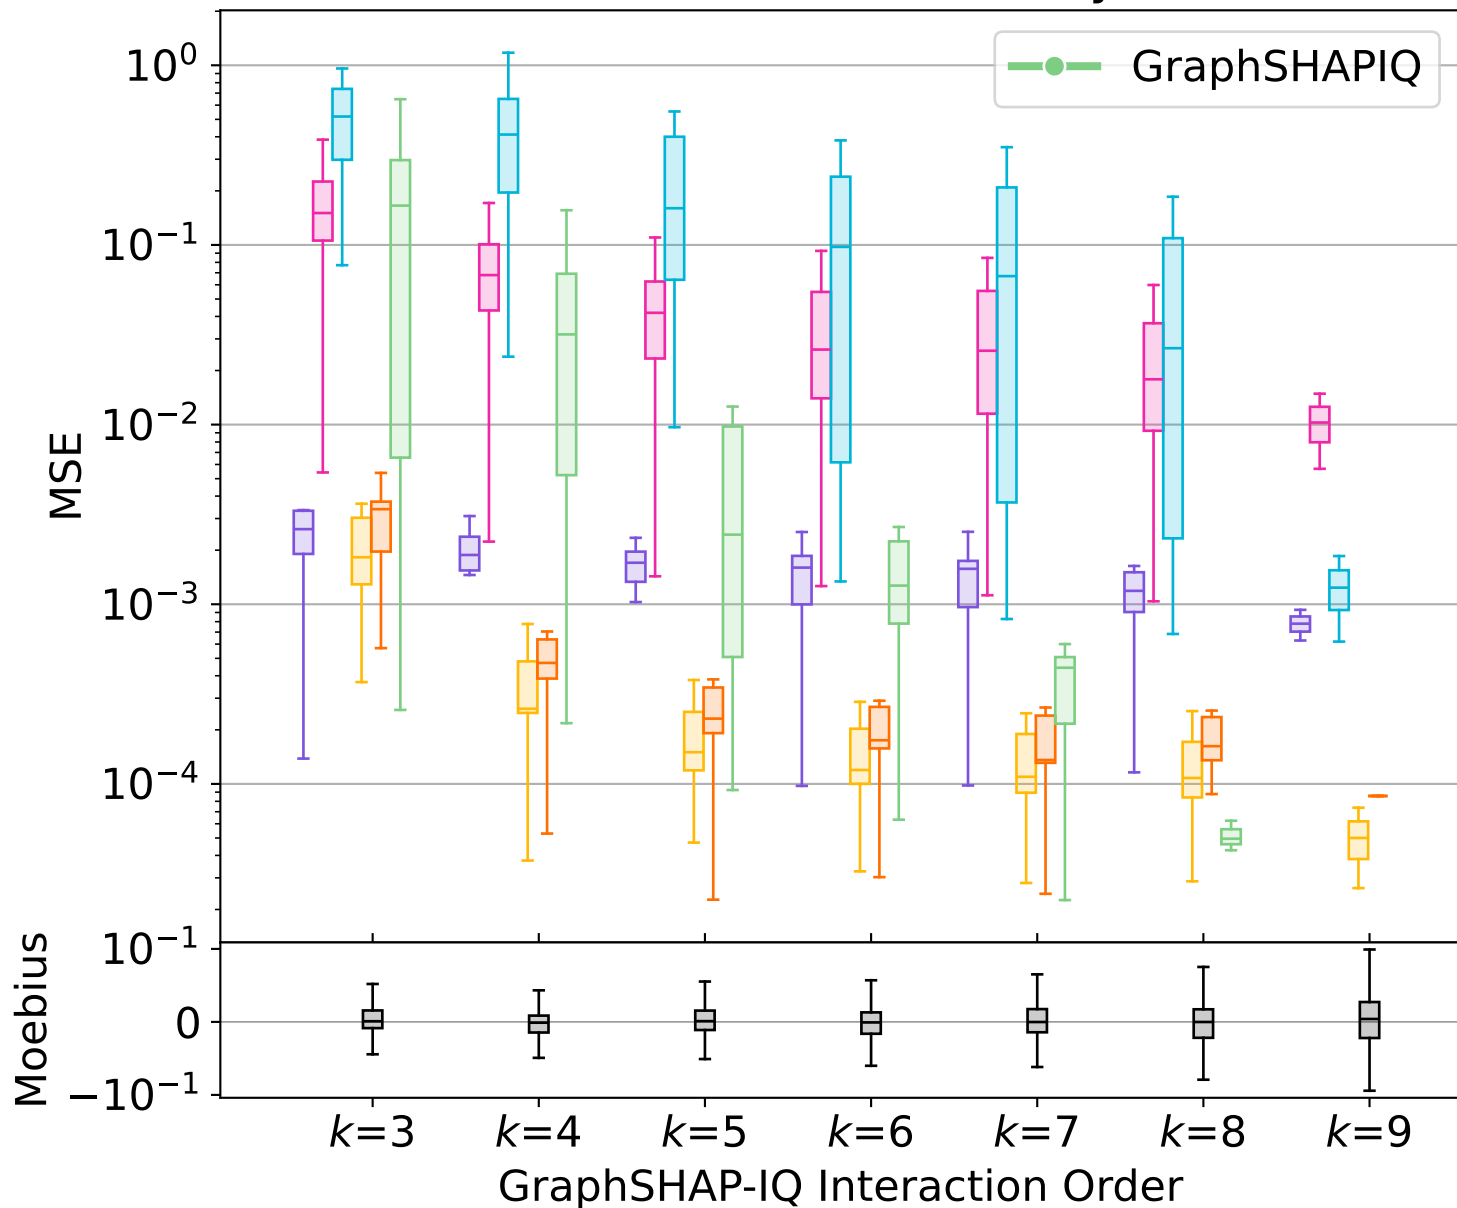

Supplement: supplementary_material [file attachment]

**SV:**

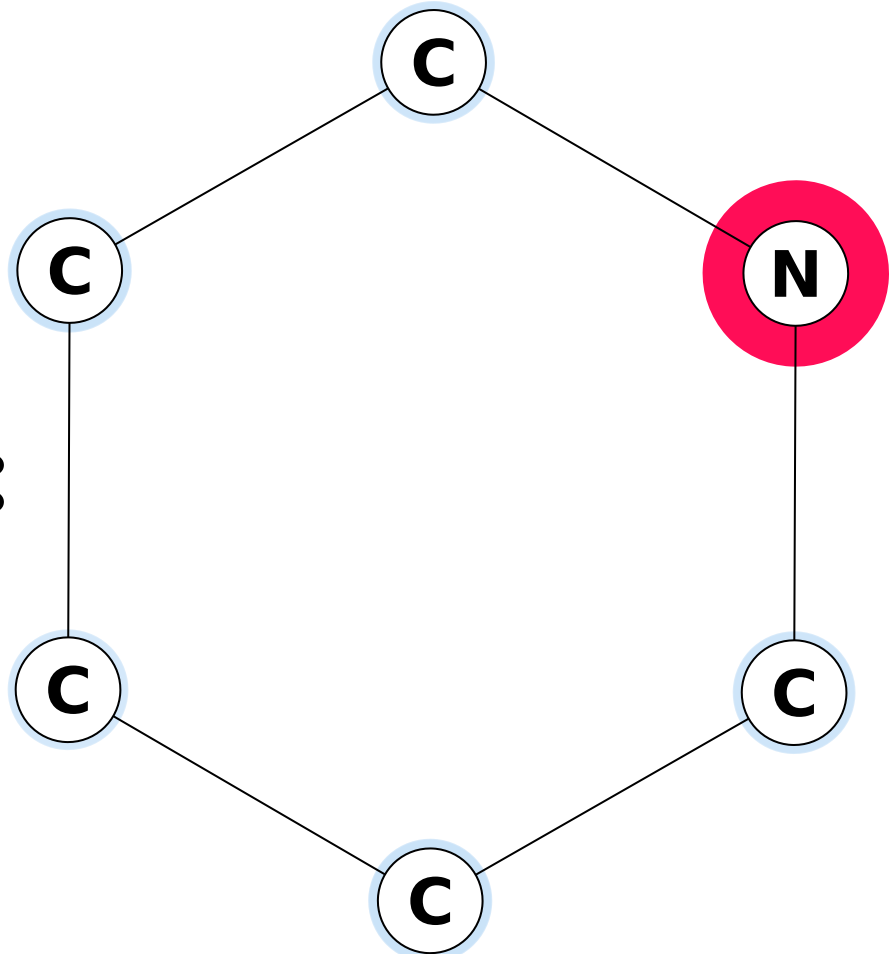

**STII:**  
(order 2)

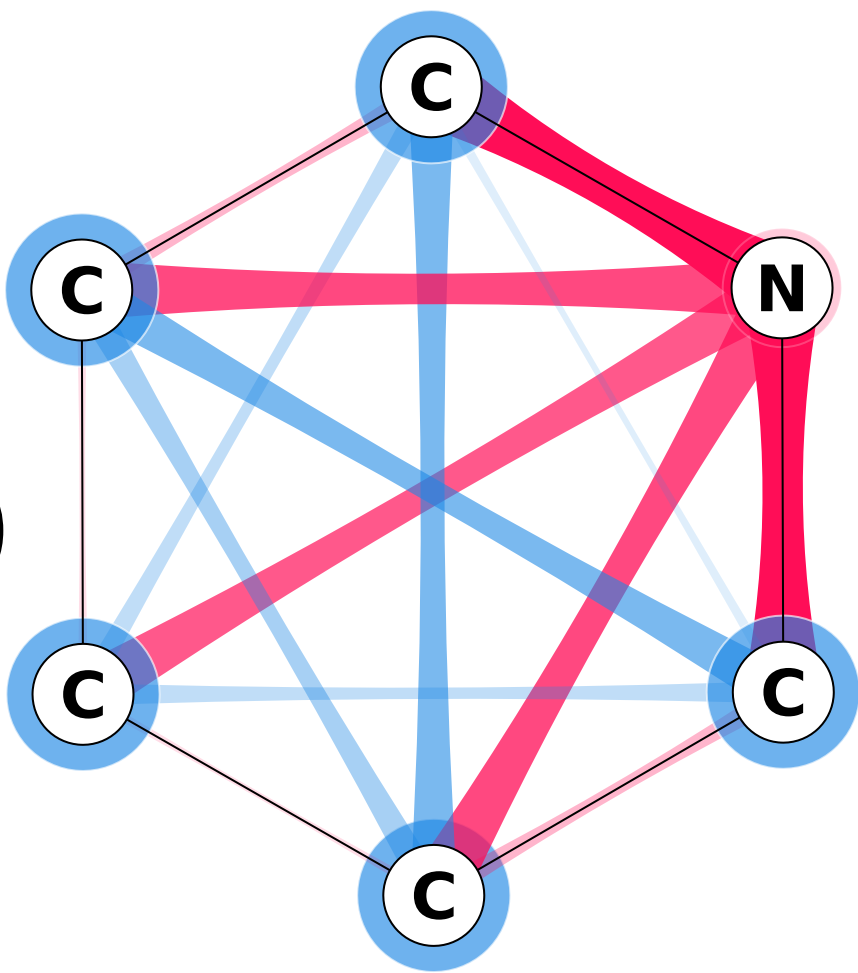

Supplement: supplementary_material [file attachment]

# SV for PROTEINS with 2-layer GIN

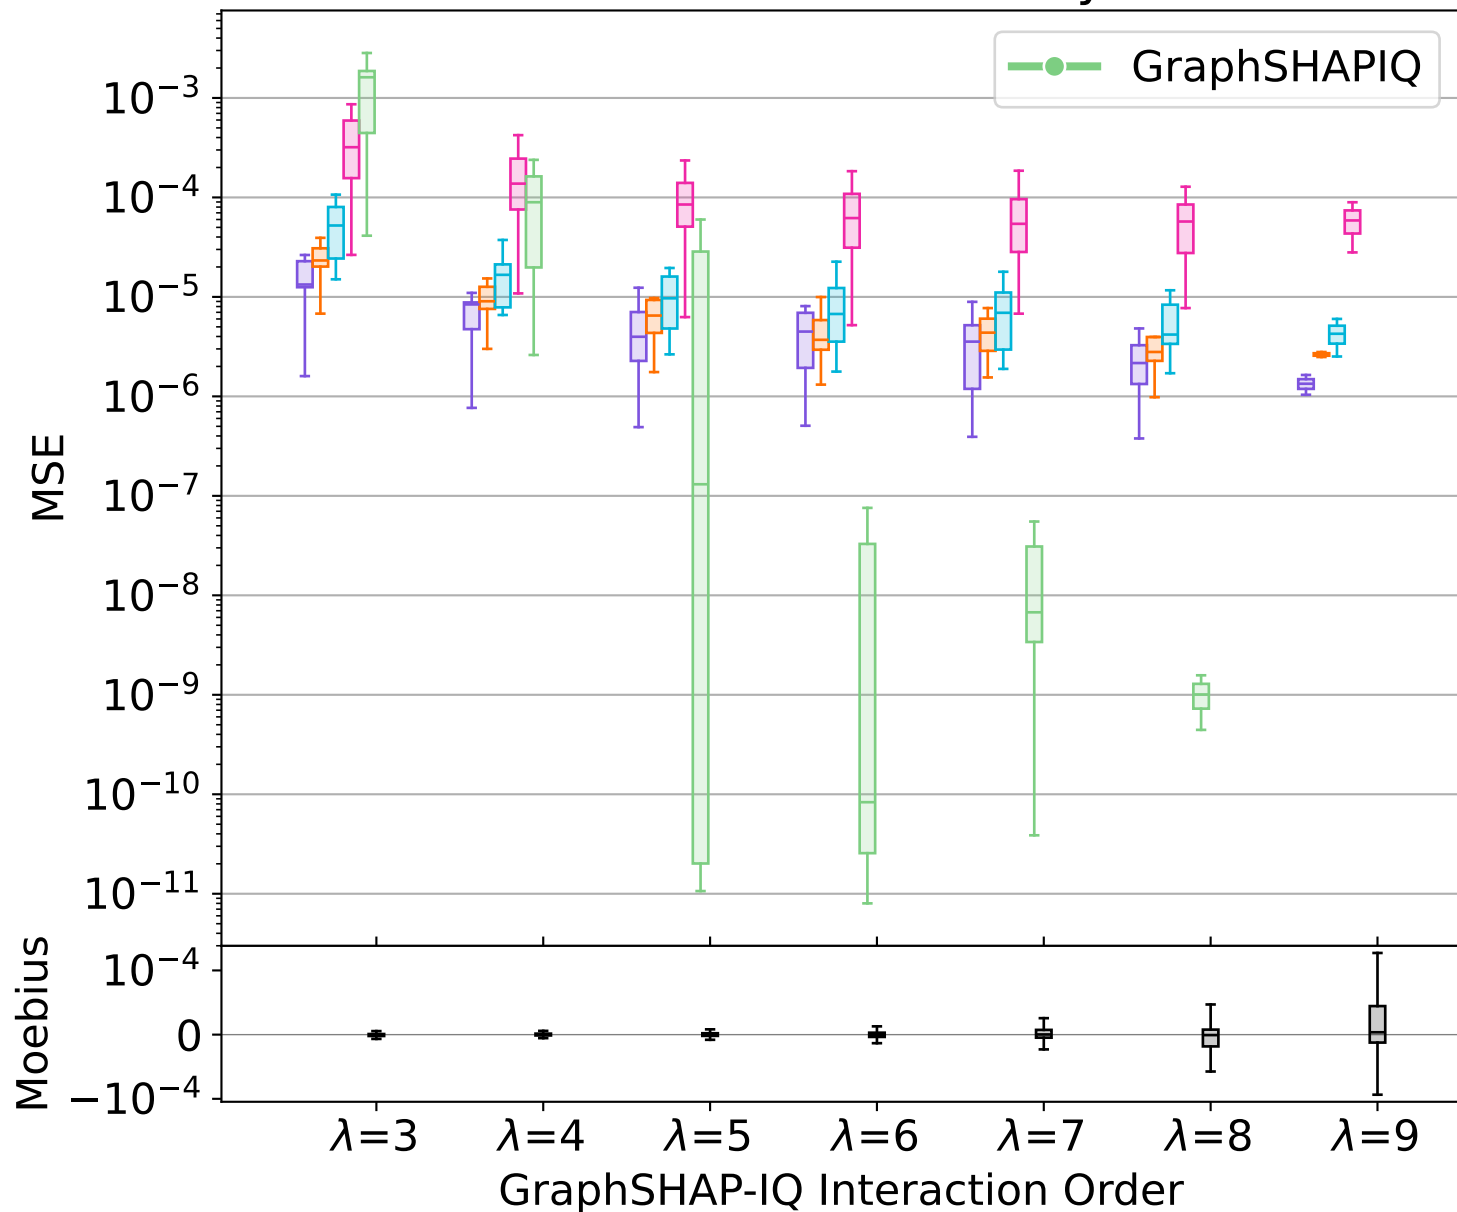

Supplement: supplementary_material [file attachment]

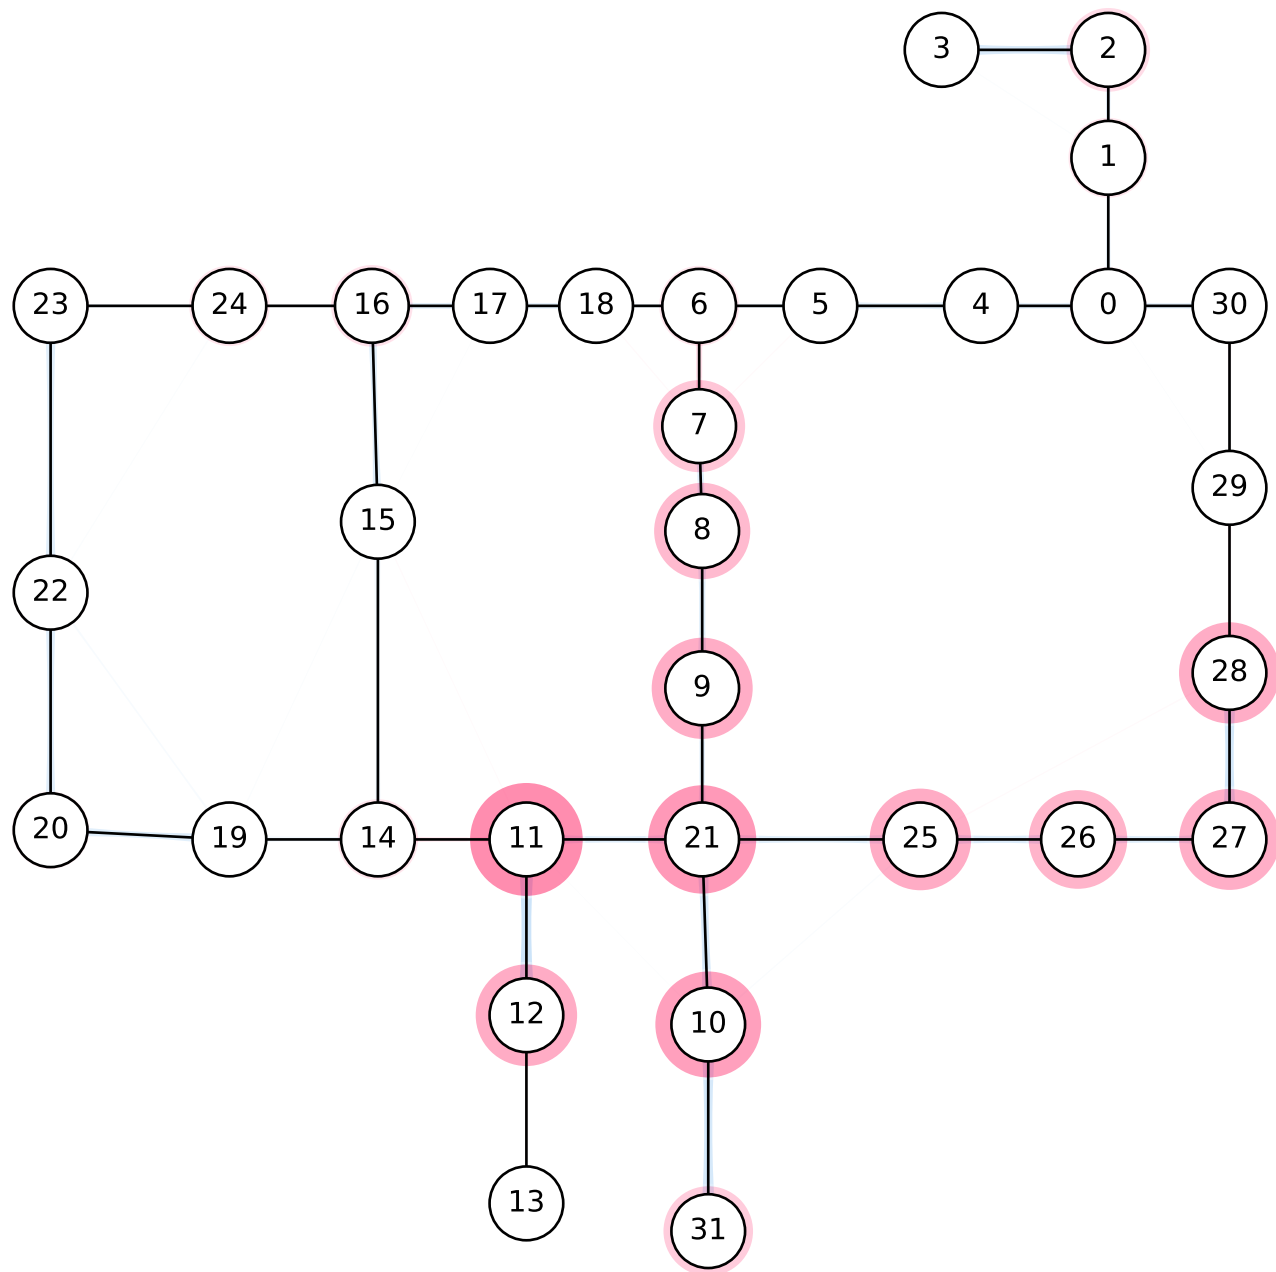

Supplement: supplementary_material [file attachment]

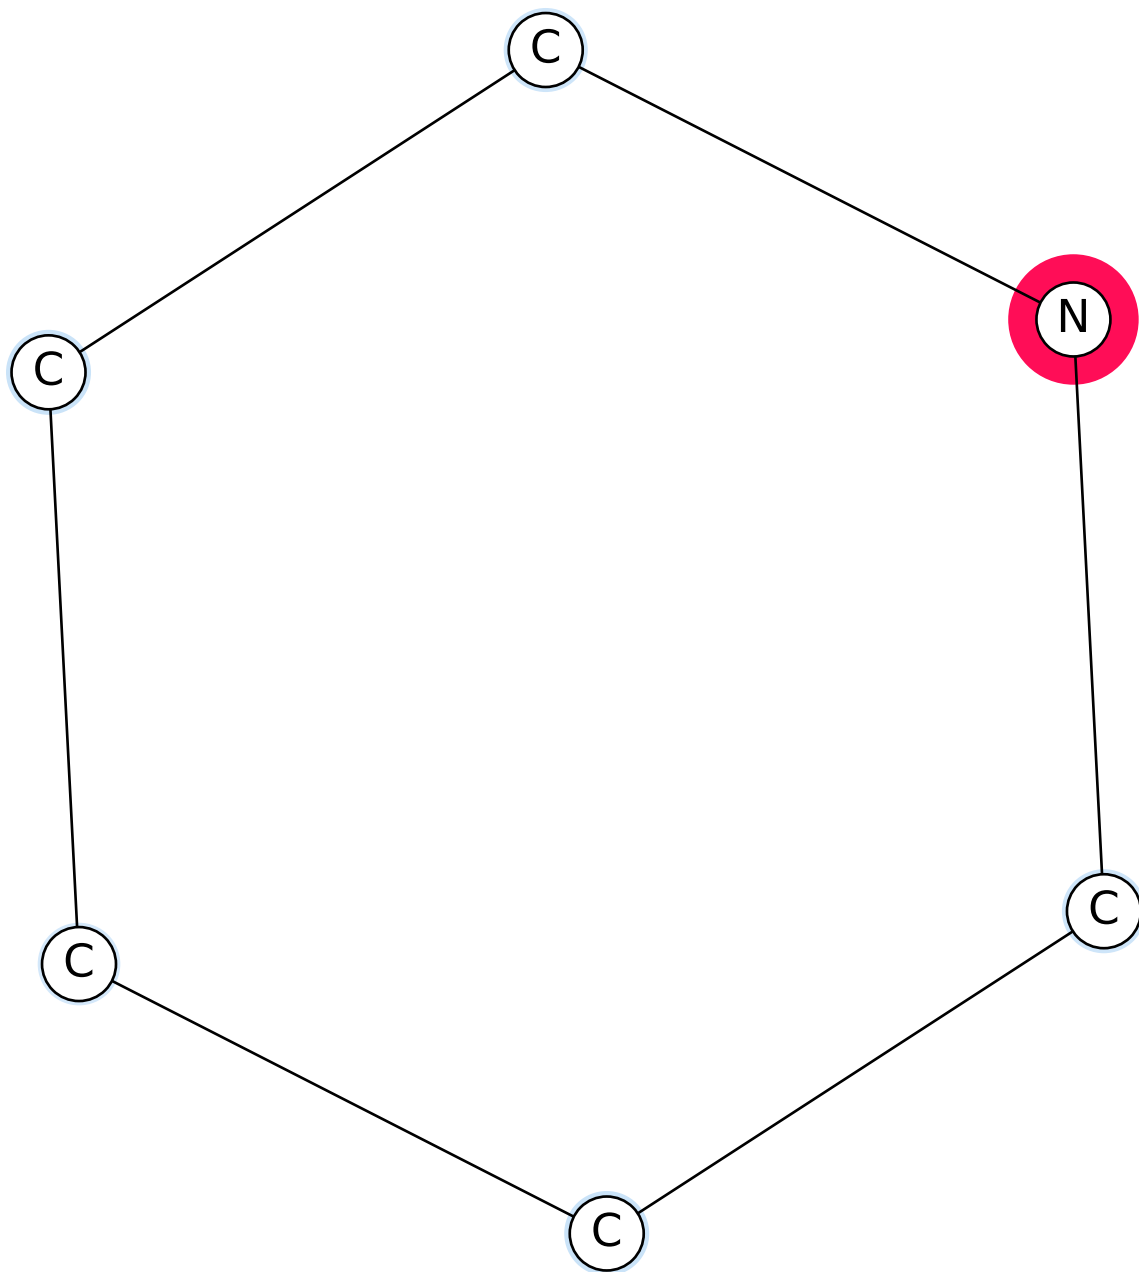

Supplement: supplementary_material [file attachment]

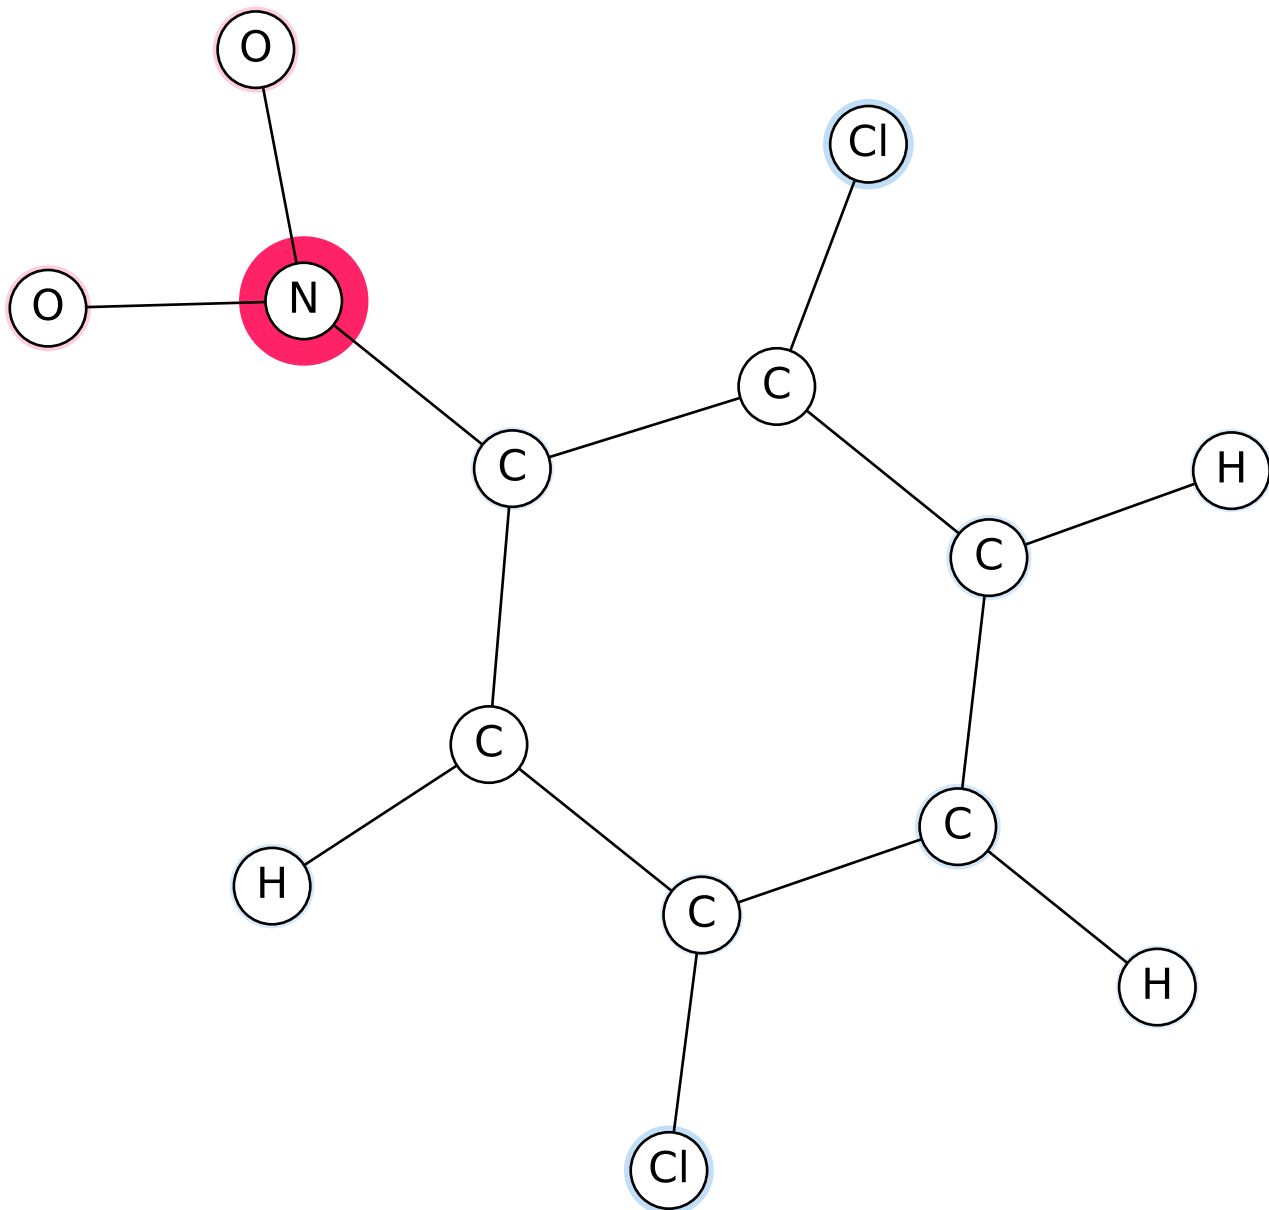

Supplement: supplementary_material [file attachment]

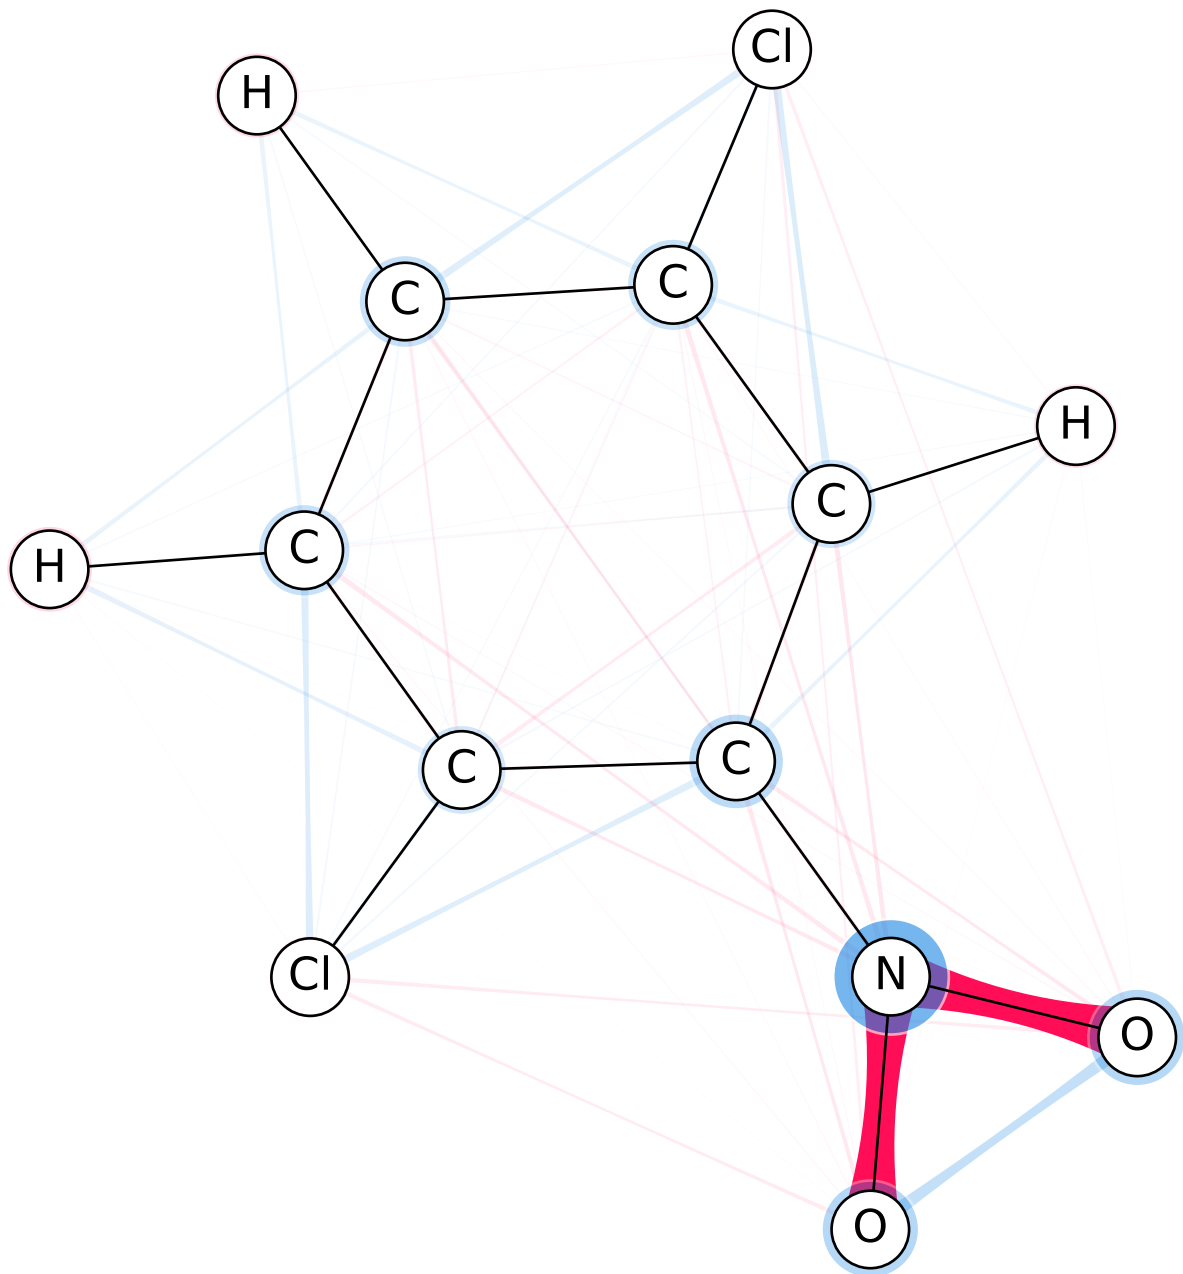

Supplement: supplementary_material [file attachment]

2-SII for PROTEINS with 2-layer GAT

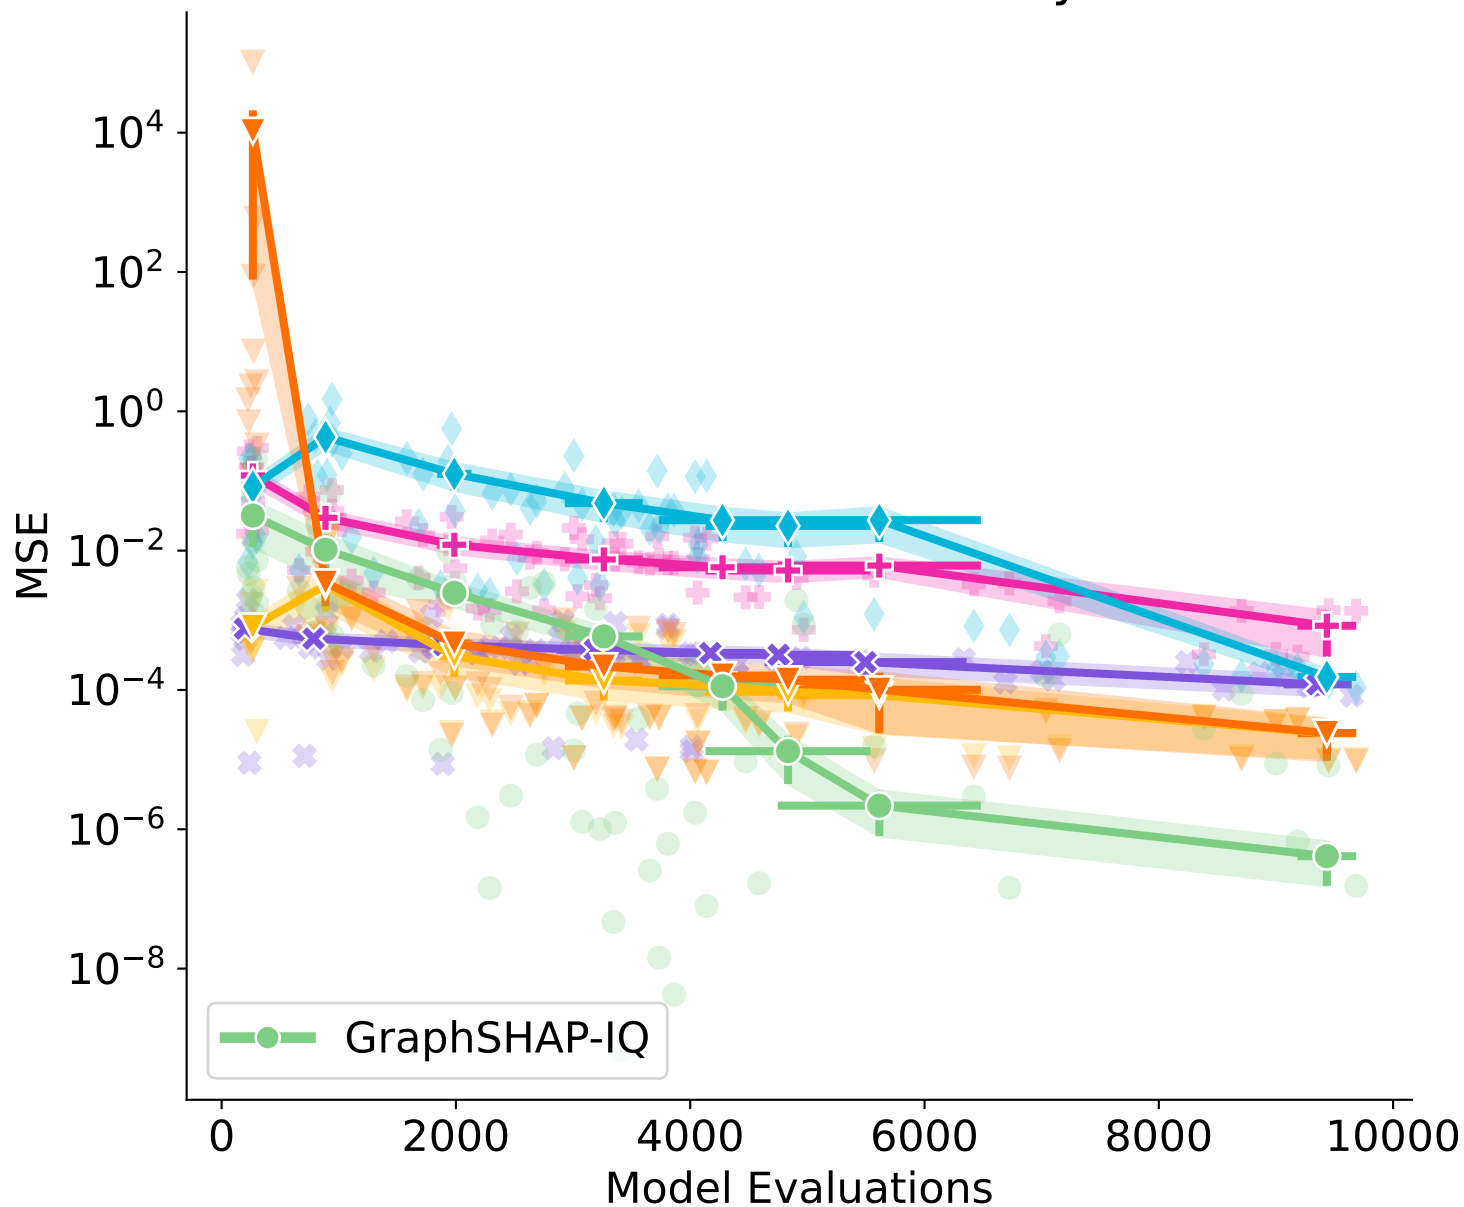

Supplement: supplementary_material [file attachment]

## 2-SII for Mutagenicity with 2-layer GAT

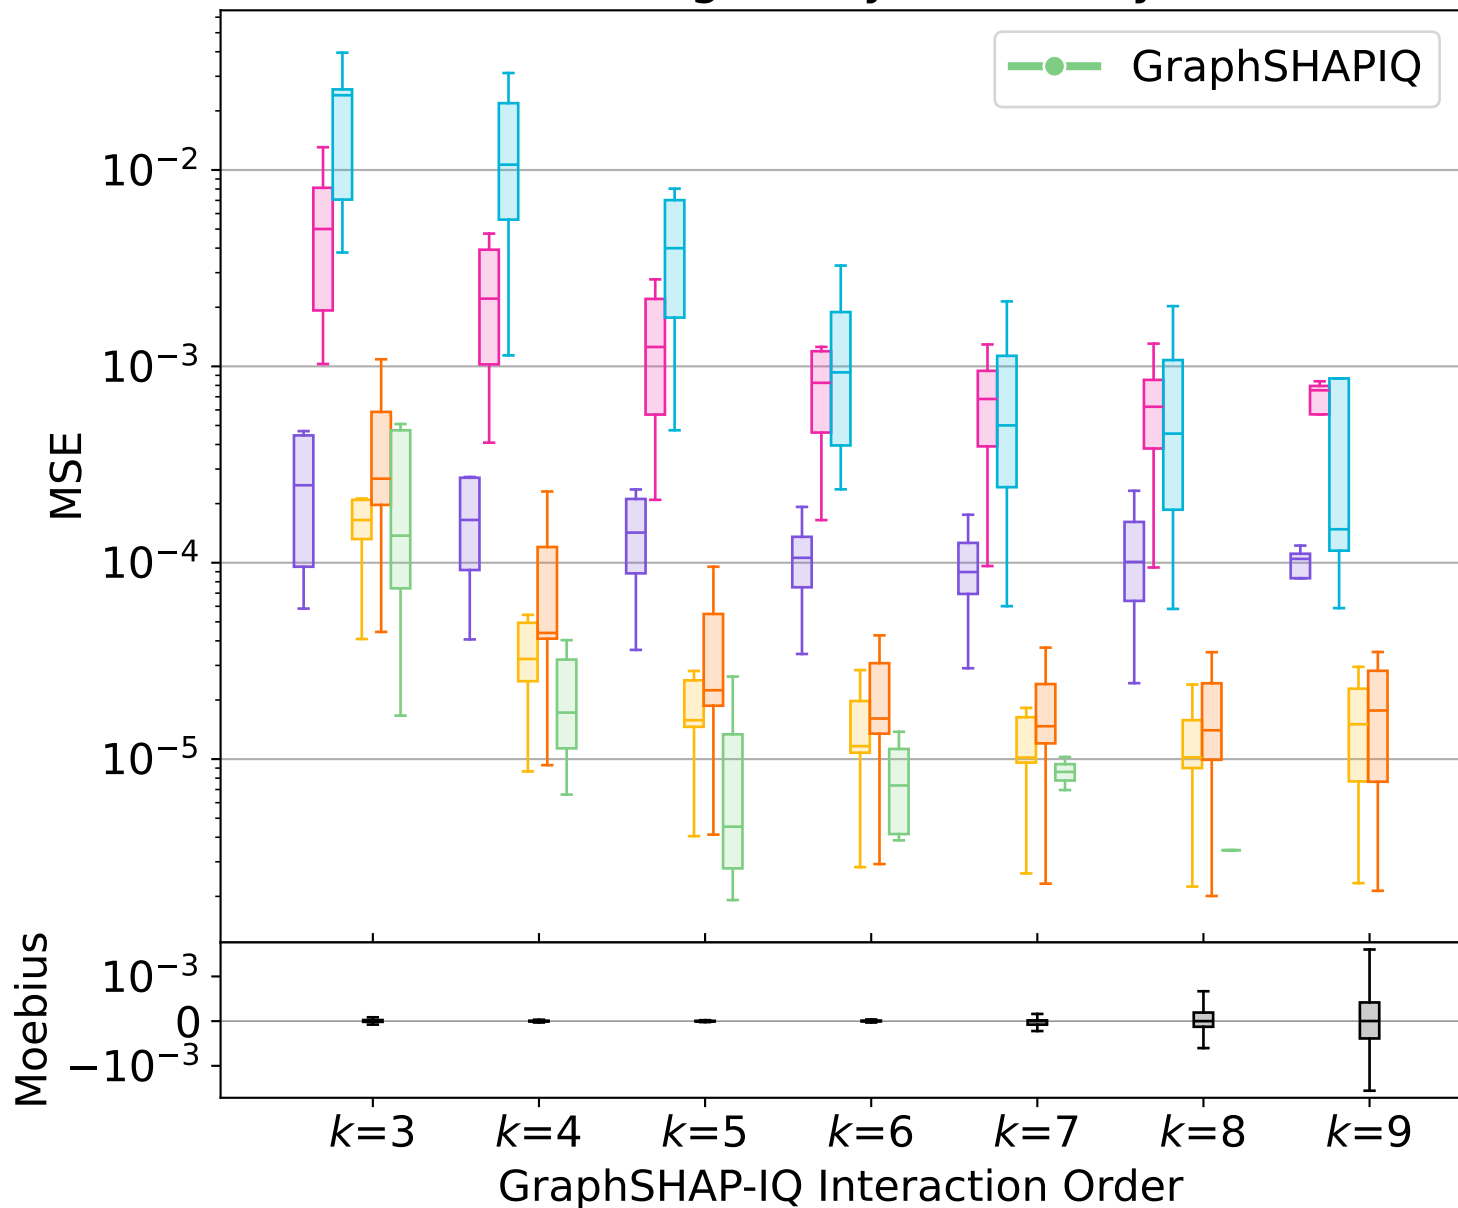

Supplement: supplementary_material [file attachment]

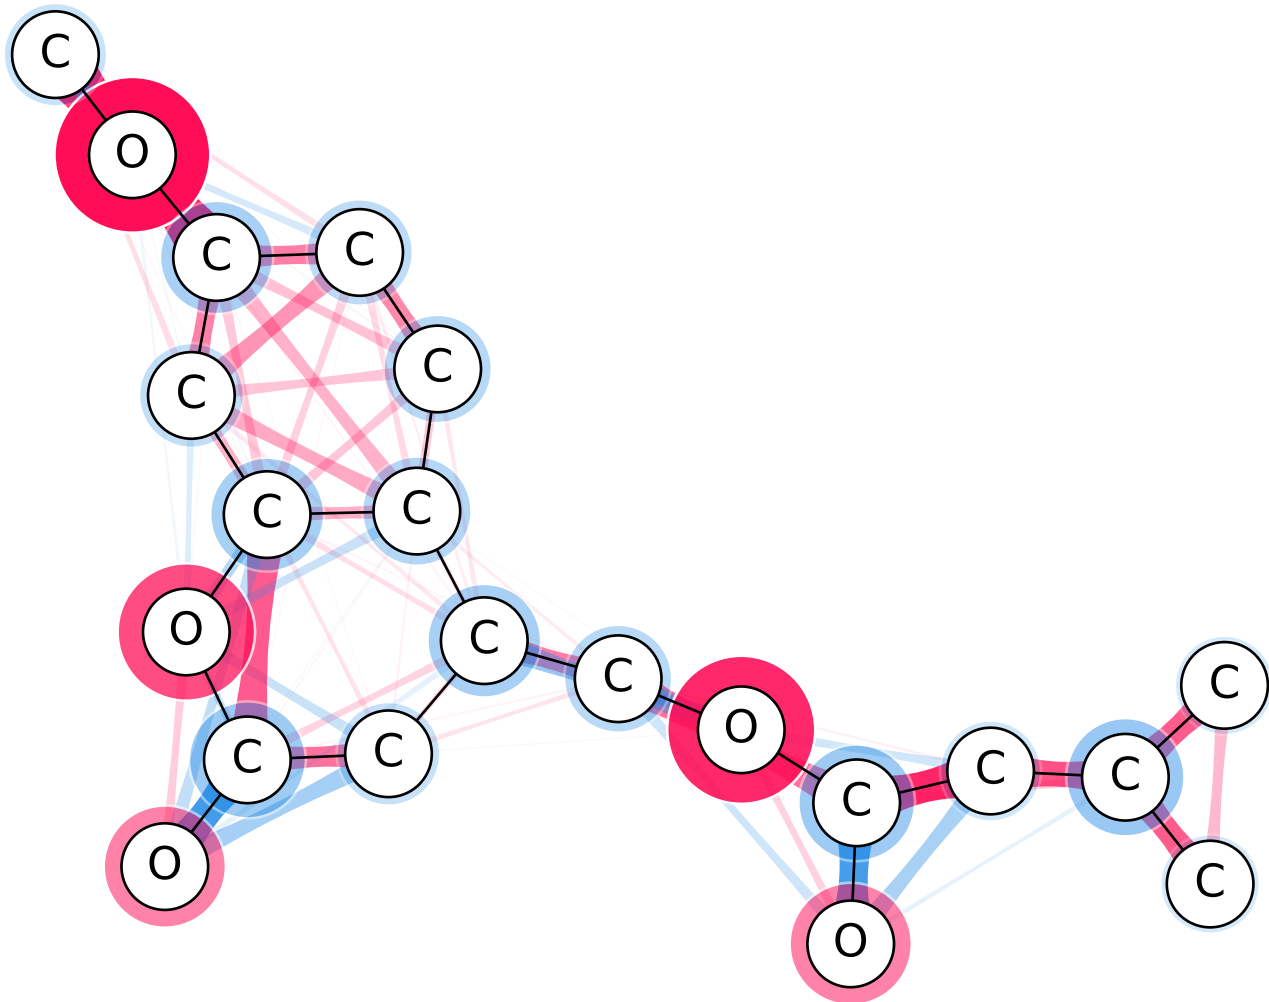

Supplement: supplementary_material [file attachment]

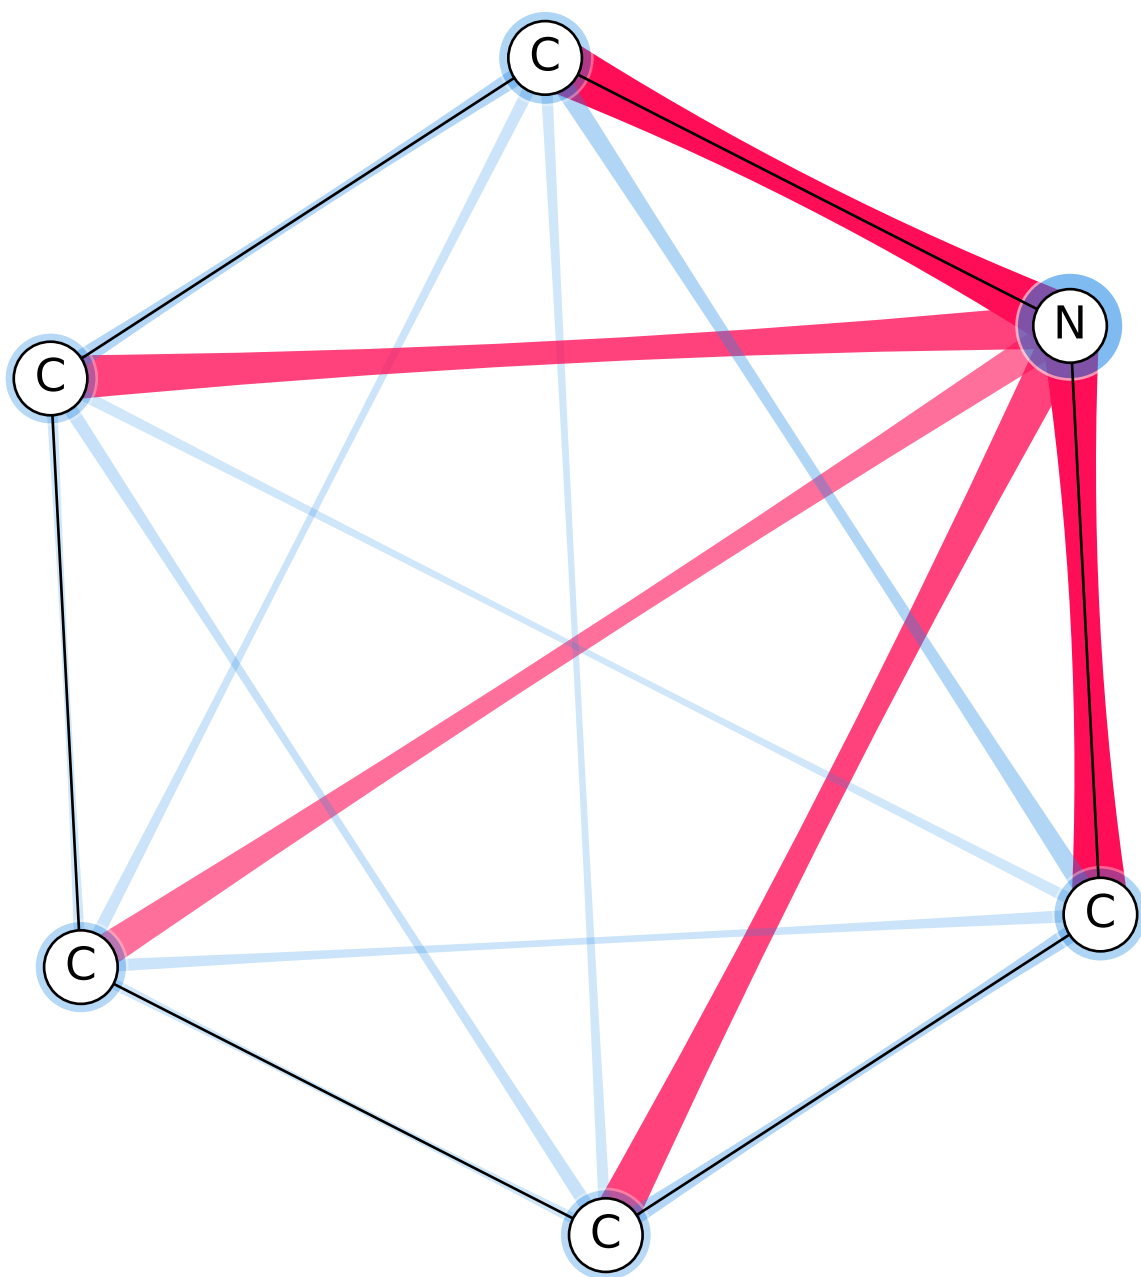

Supplement: supplementary_material [file attachment]

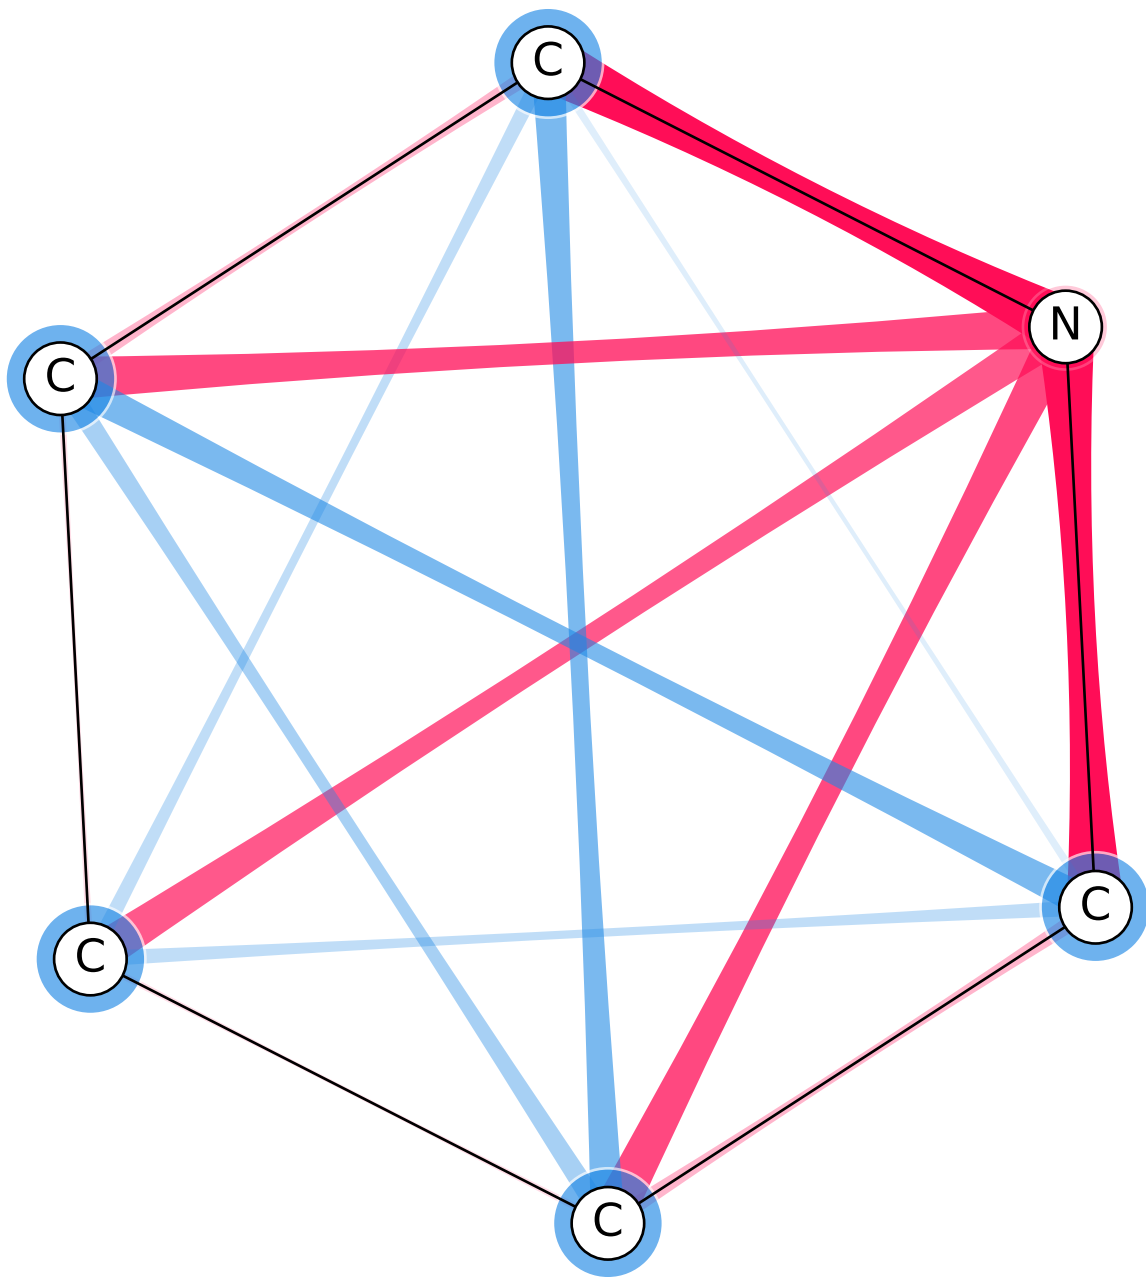

Supplement: supplementary_material [file attachment]

2-SII for BZR with 2-layer GAT

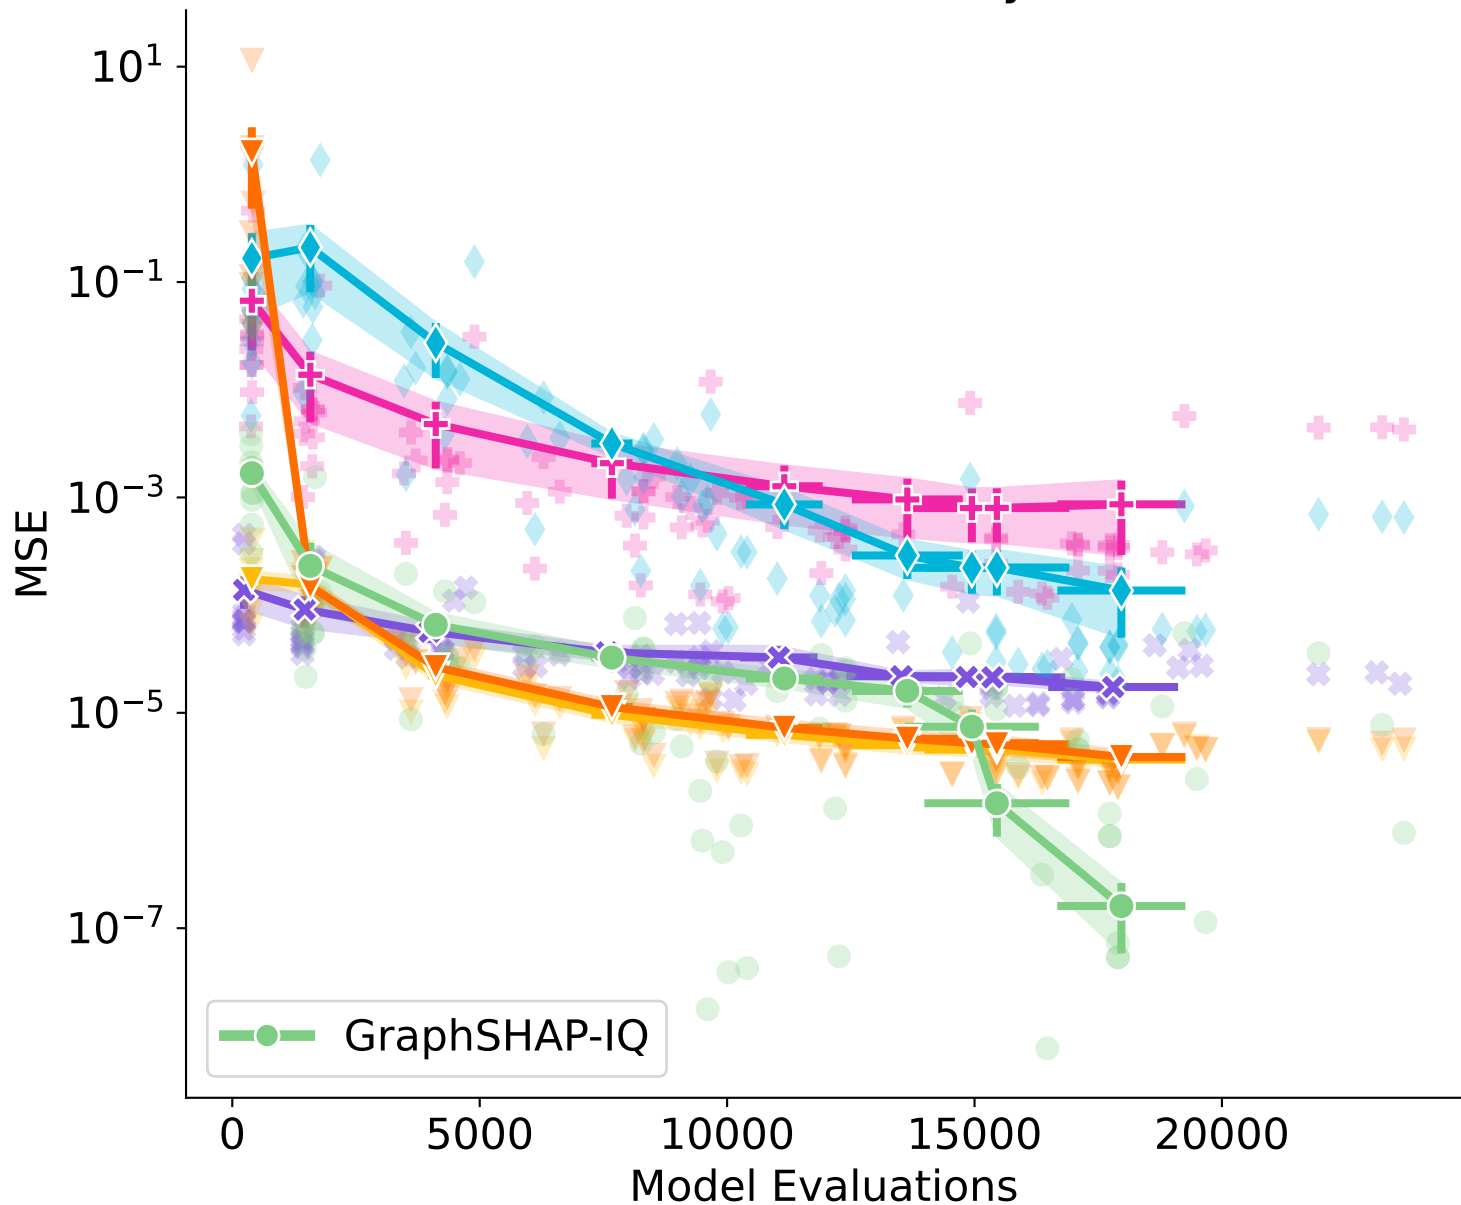

Supplement: supplementary_material [file attachment]

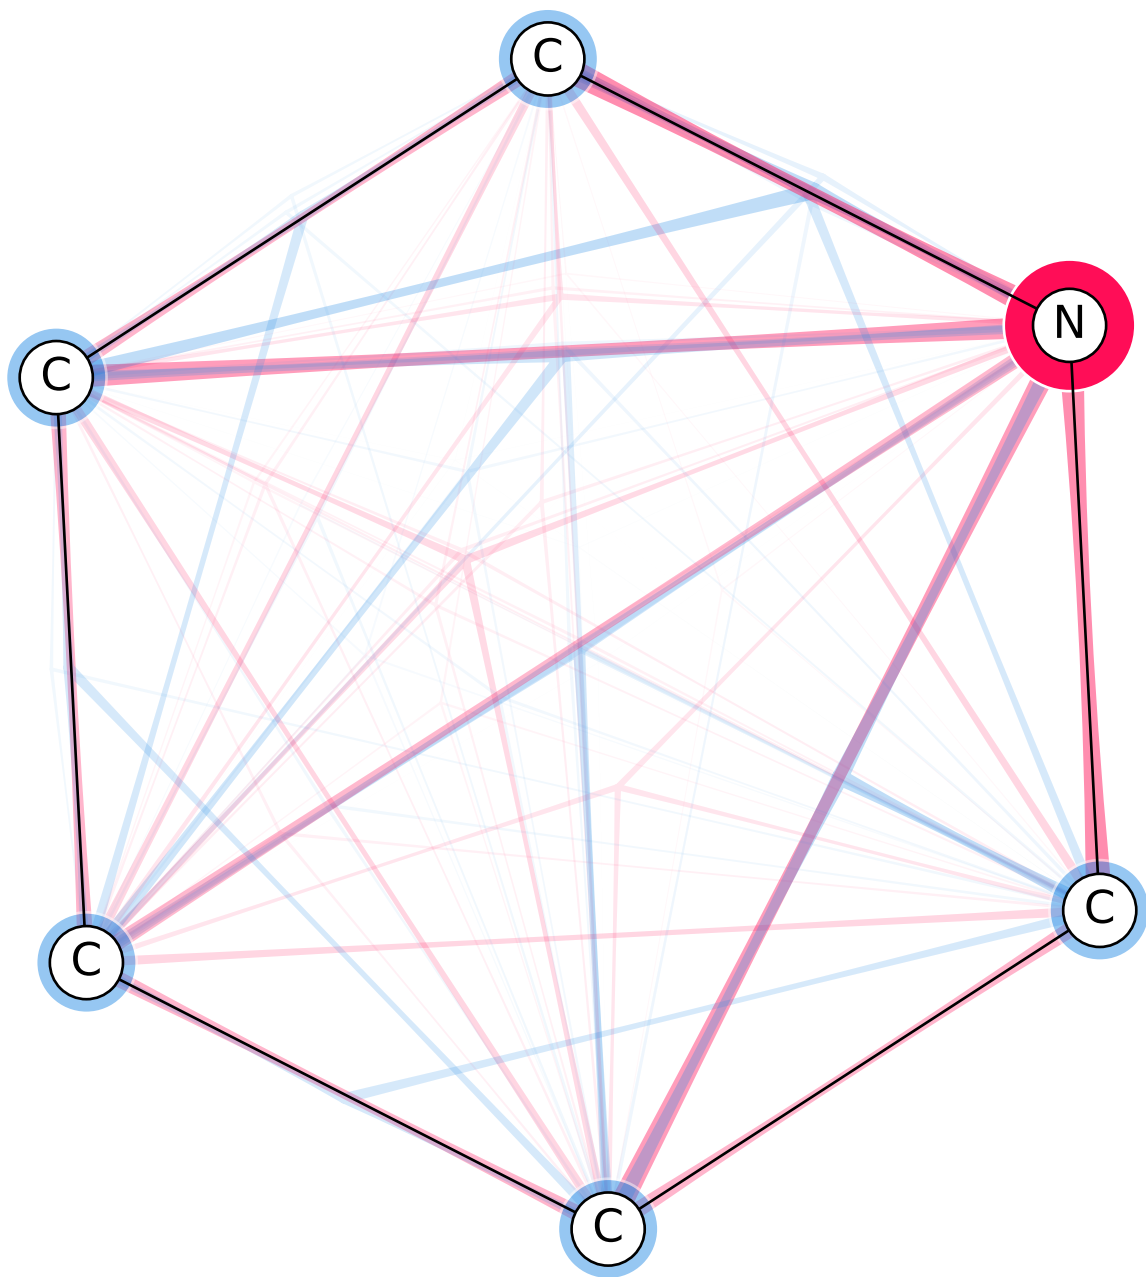

Supplement: supplementary_material [file attachment]

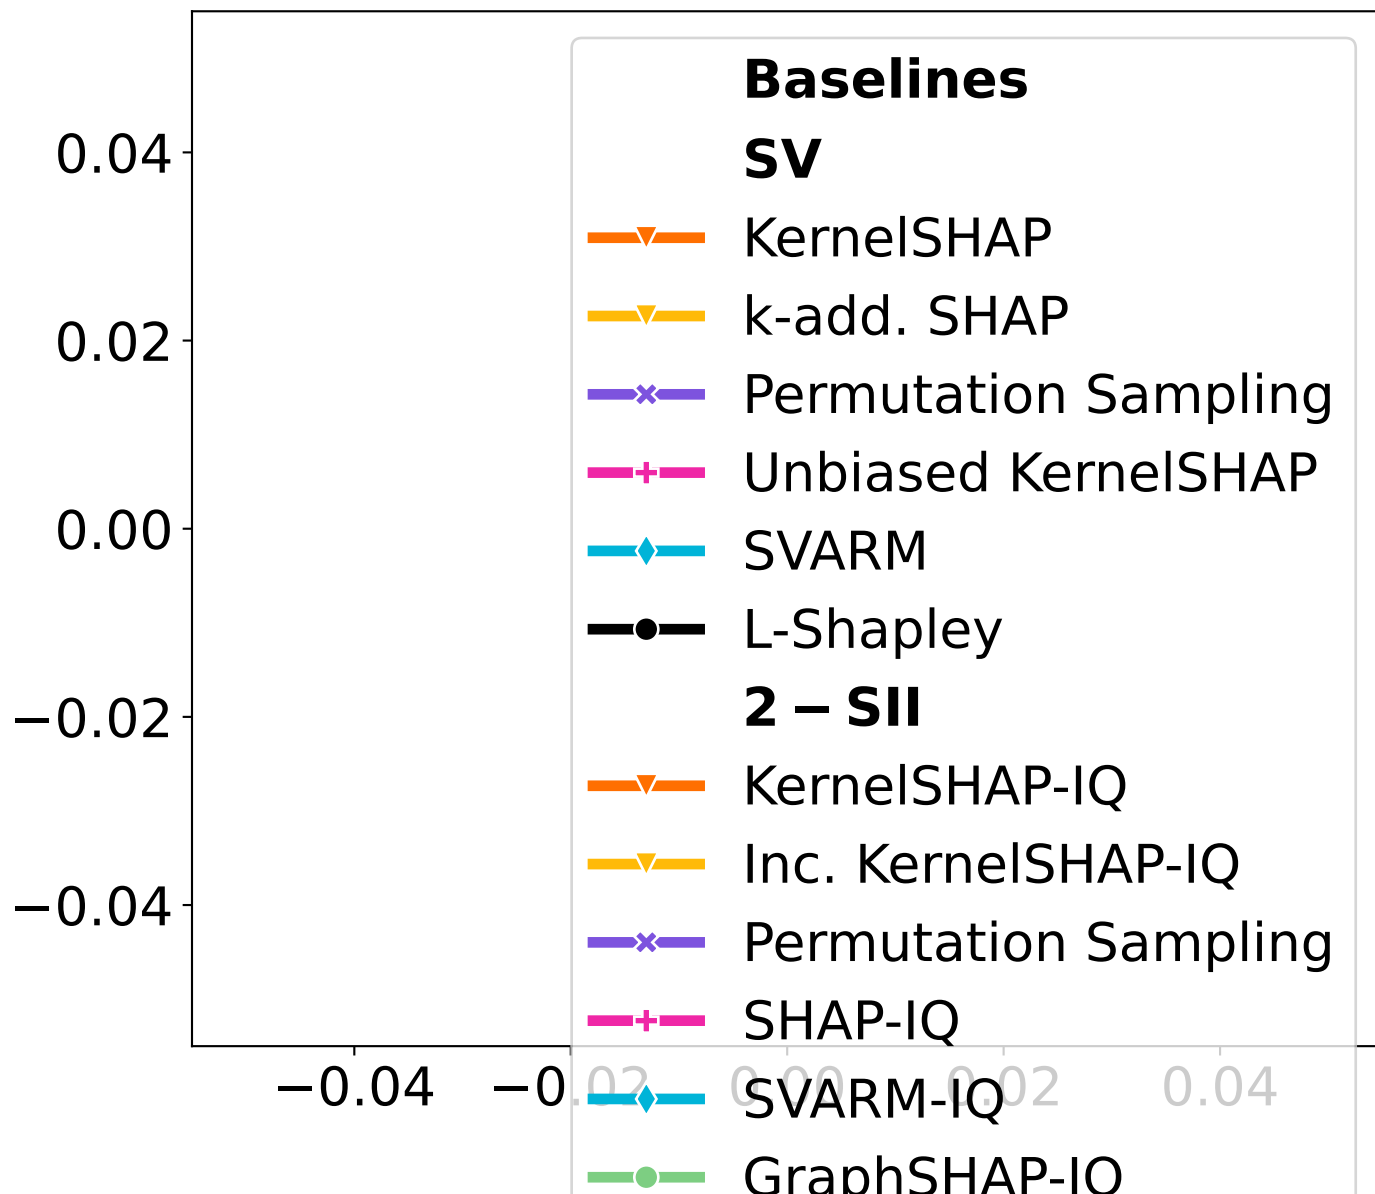

Supplement: supplementary_material [file attachment]

# Mutagenicity with 2-layer GCN

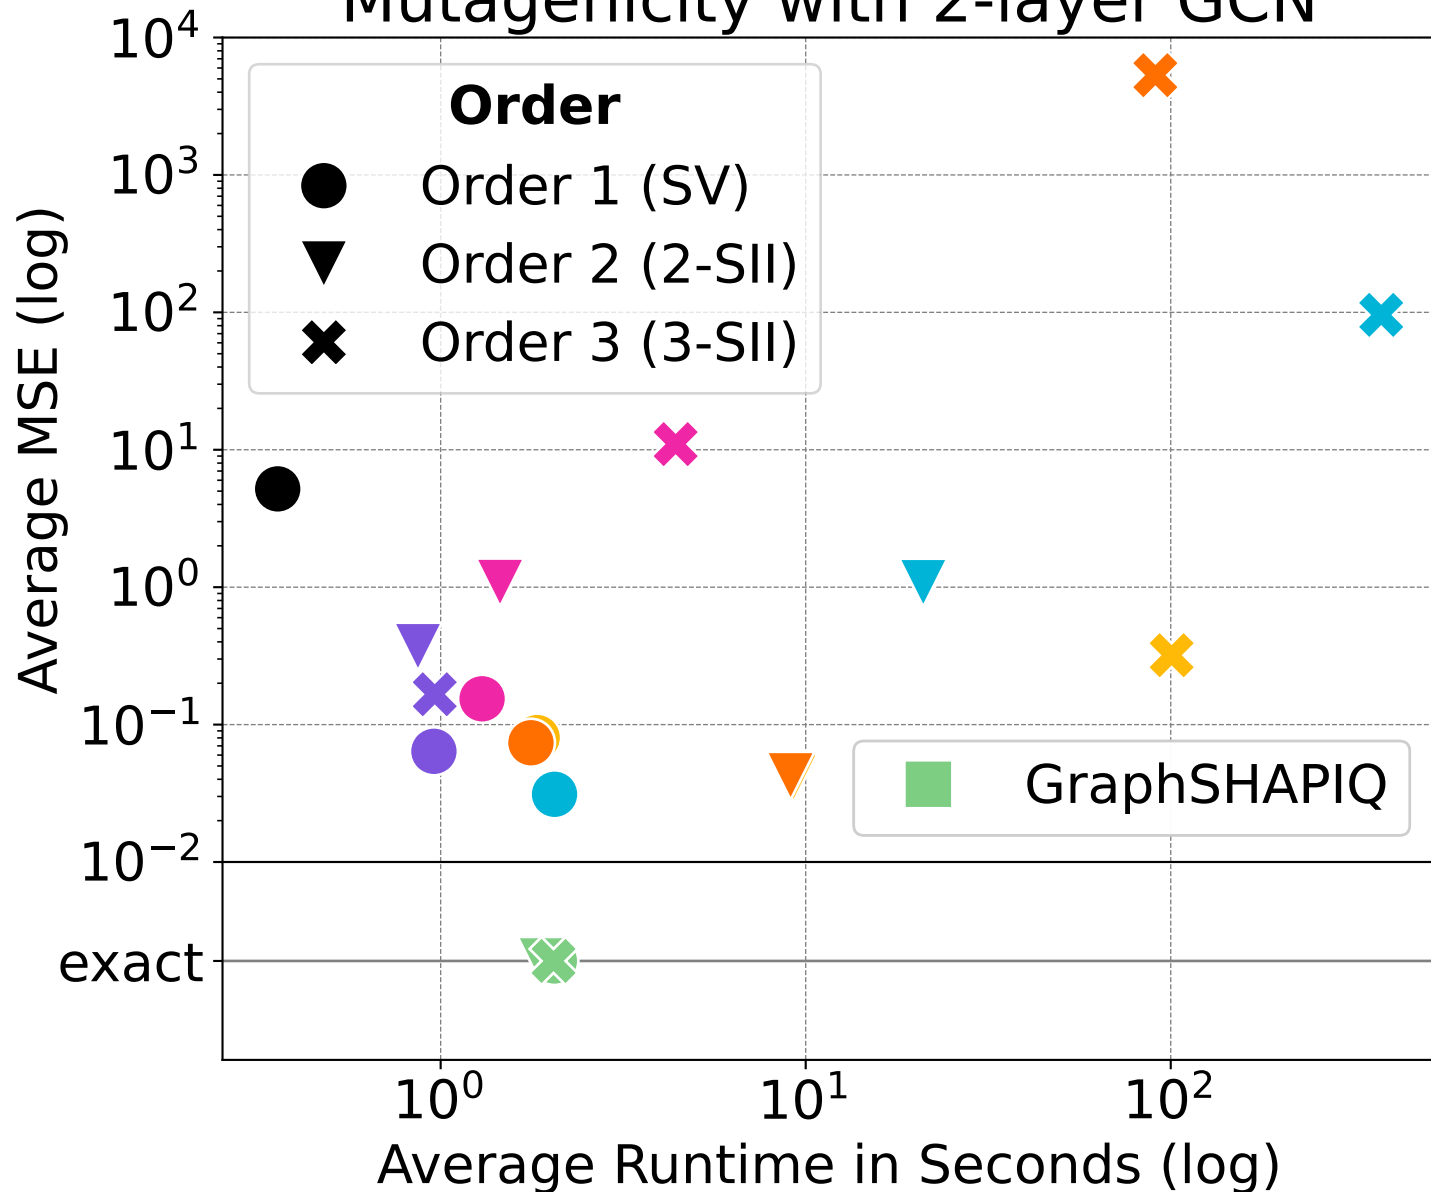

Supplement: supplementary_material [file attachment]

## 2-SII for PROTEINS with 2-layer GAT

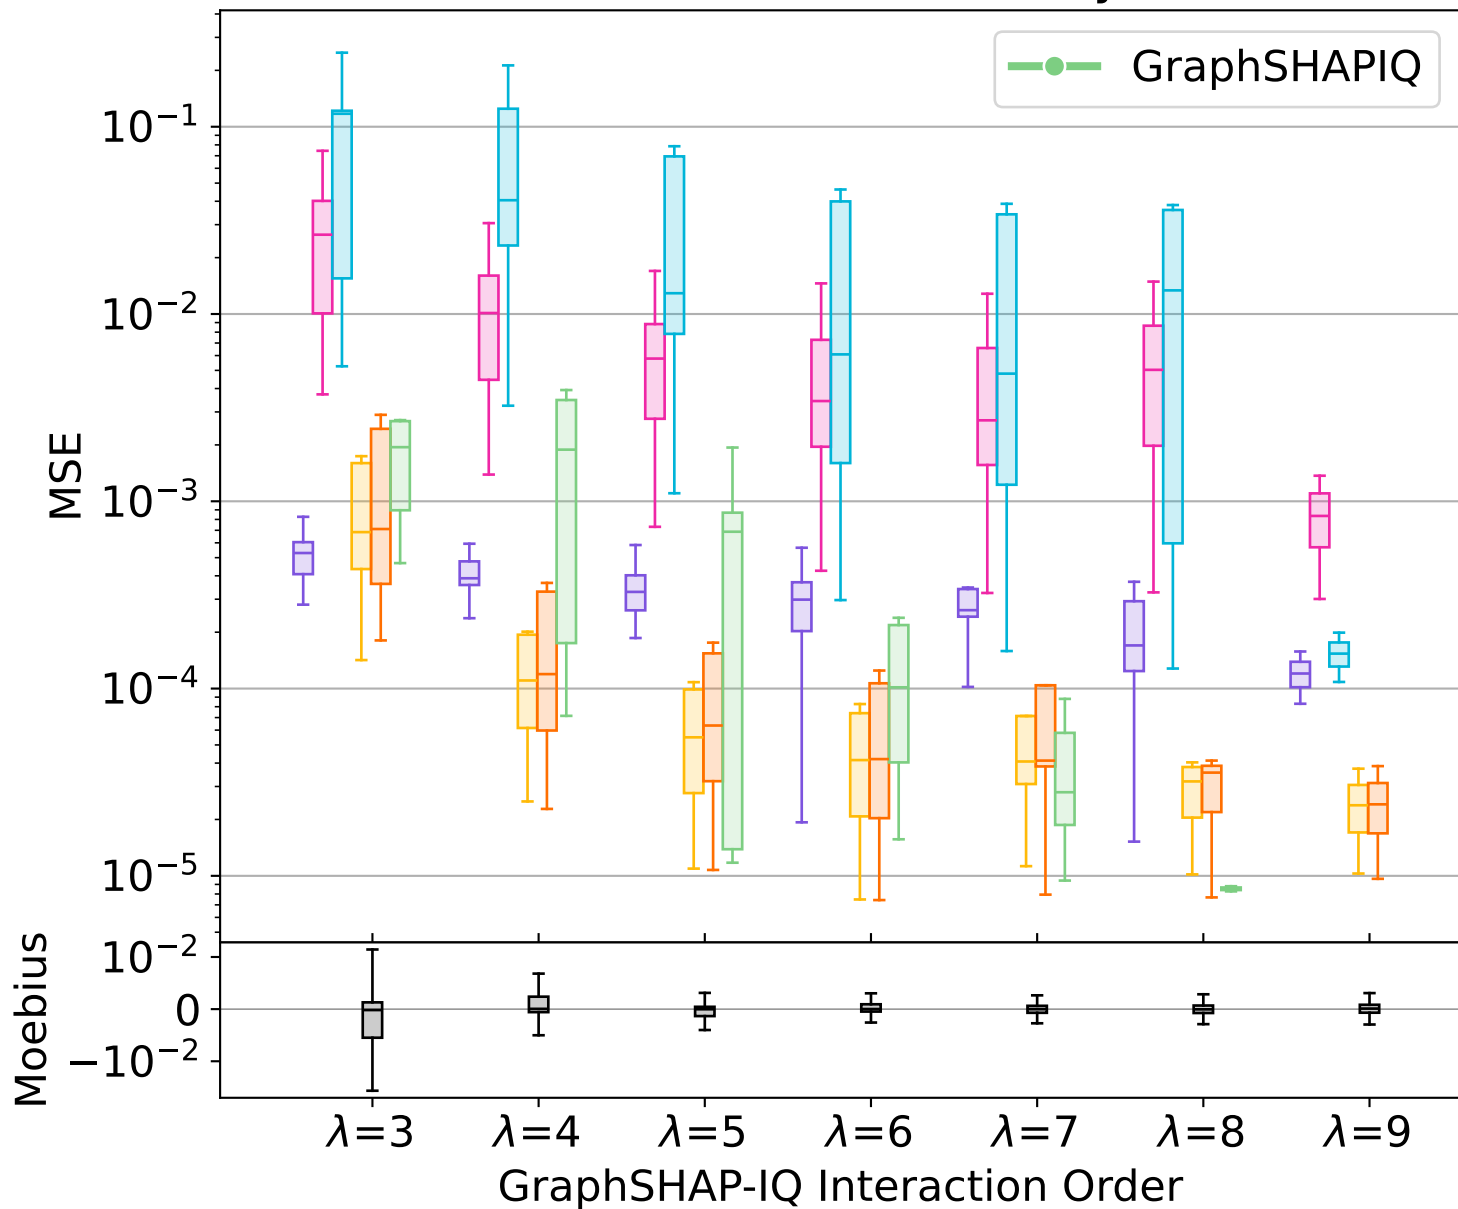

Supplement: supplementary_material [file attachment]

# SV for PROTEINS with 2-layer GIN

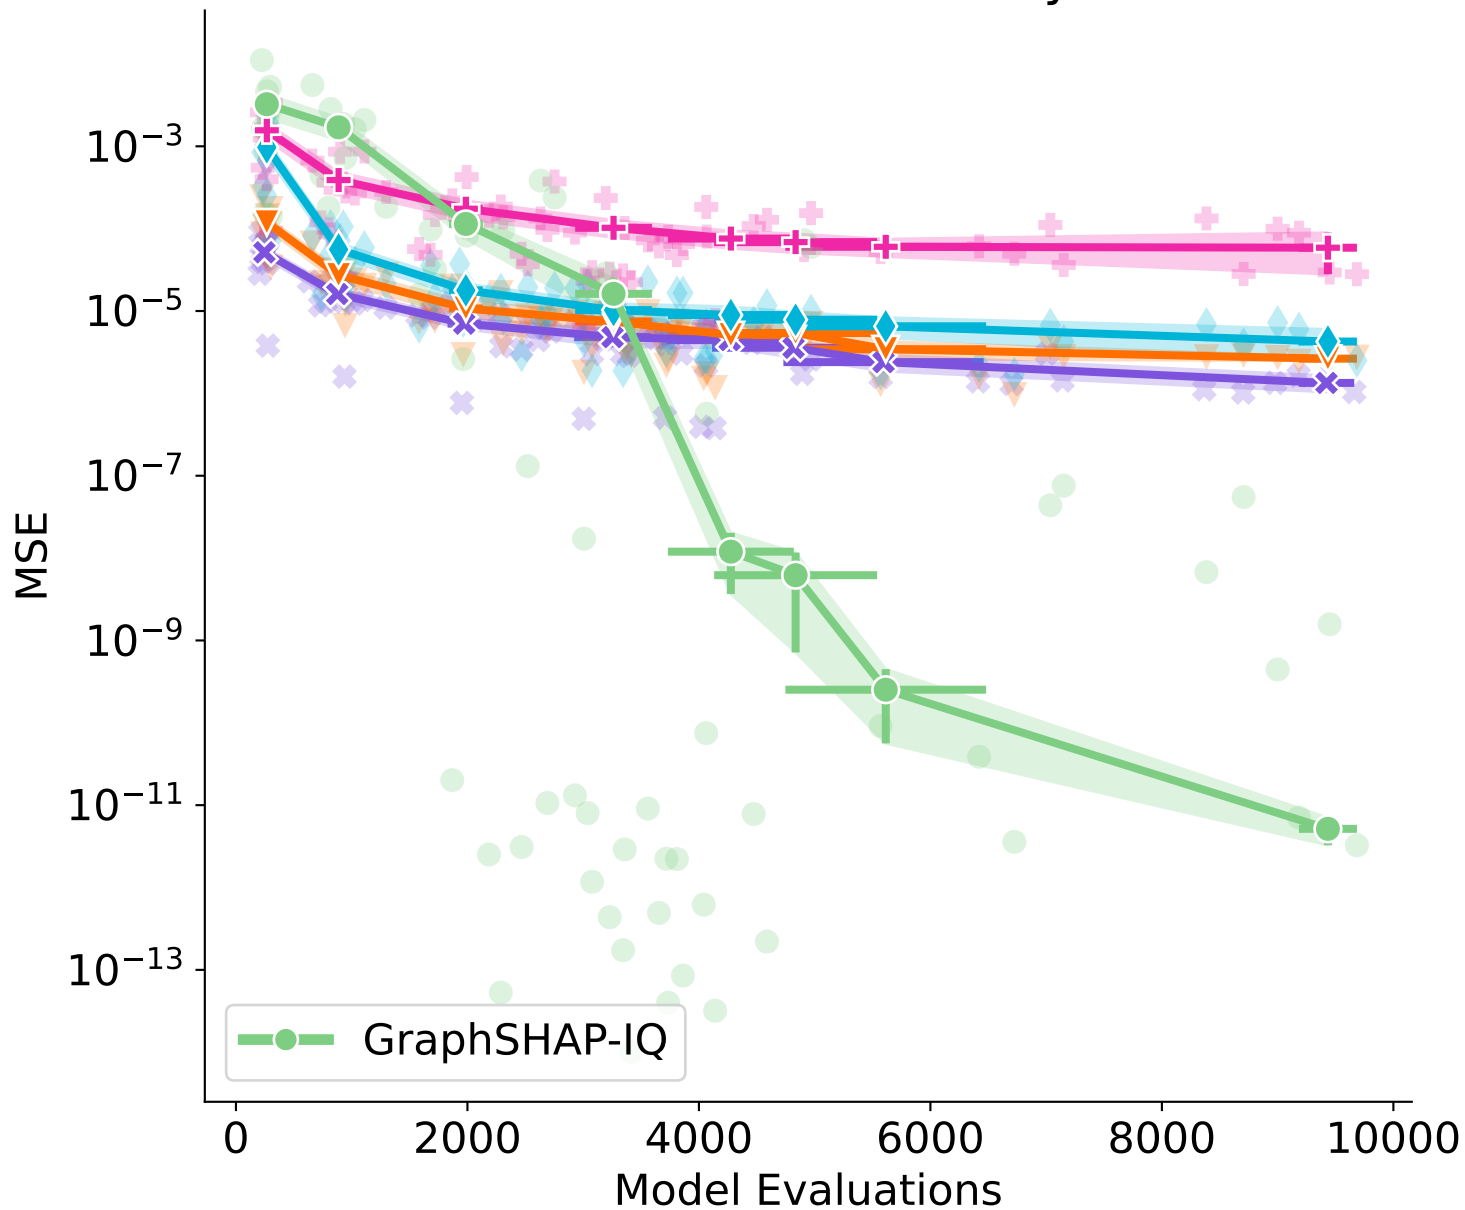

Supplement: supplementary_material [file attachment]

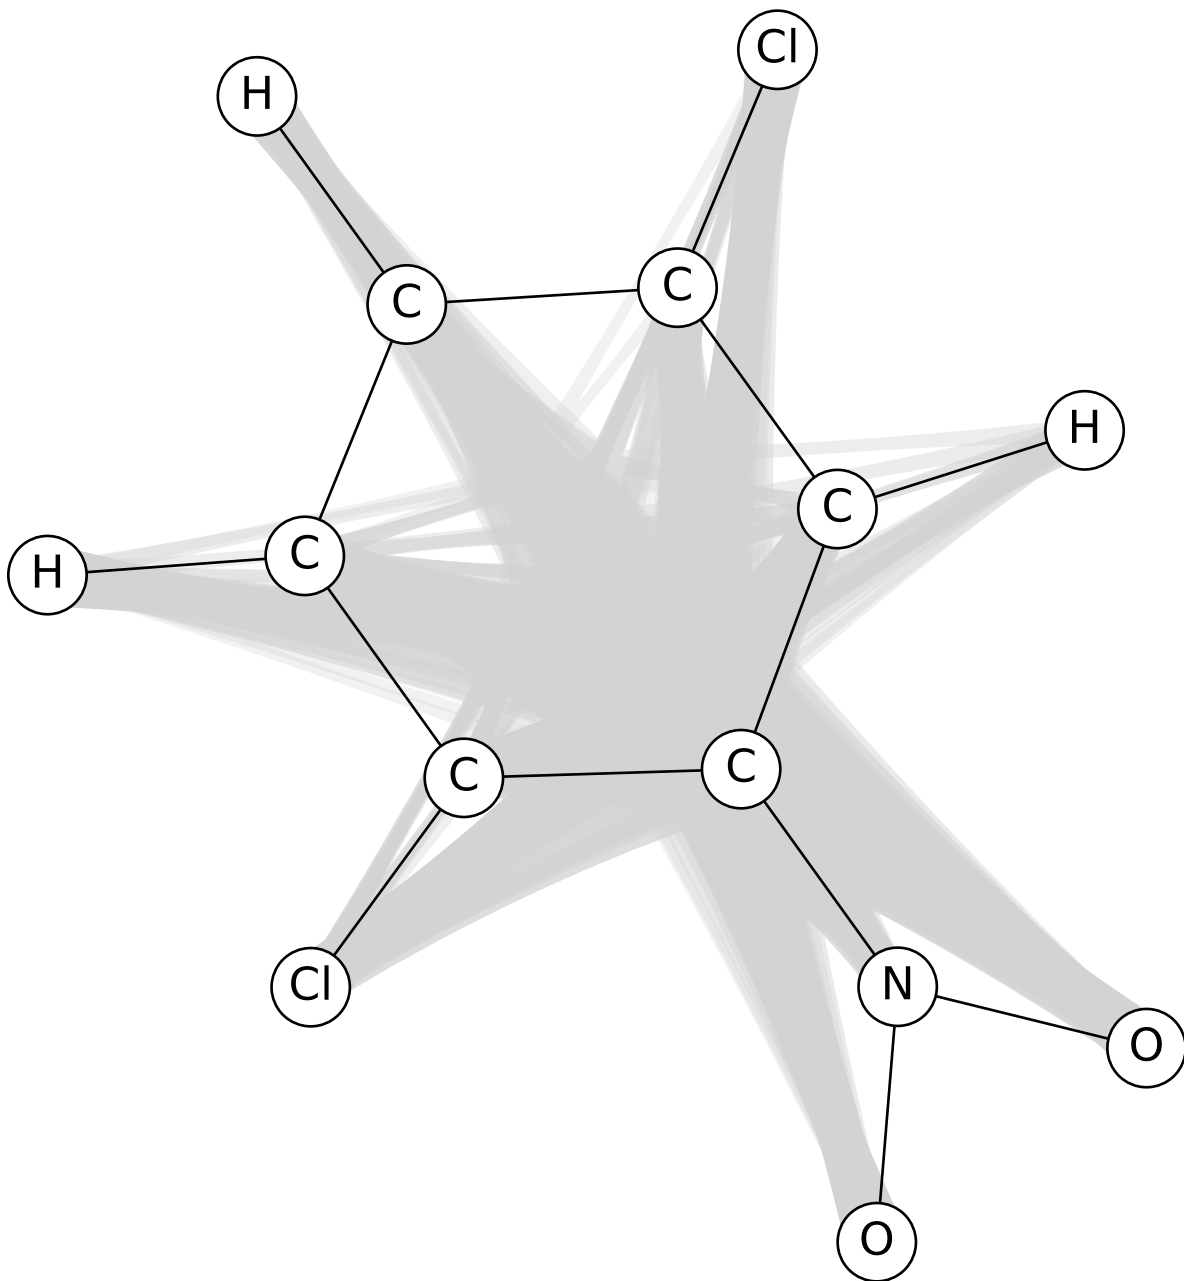

Supplement: supplementary_material [file attachment]

## 2-SII for Mutagenicity with 2-layer GCN

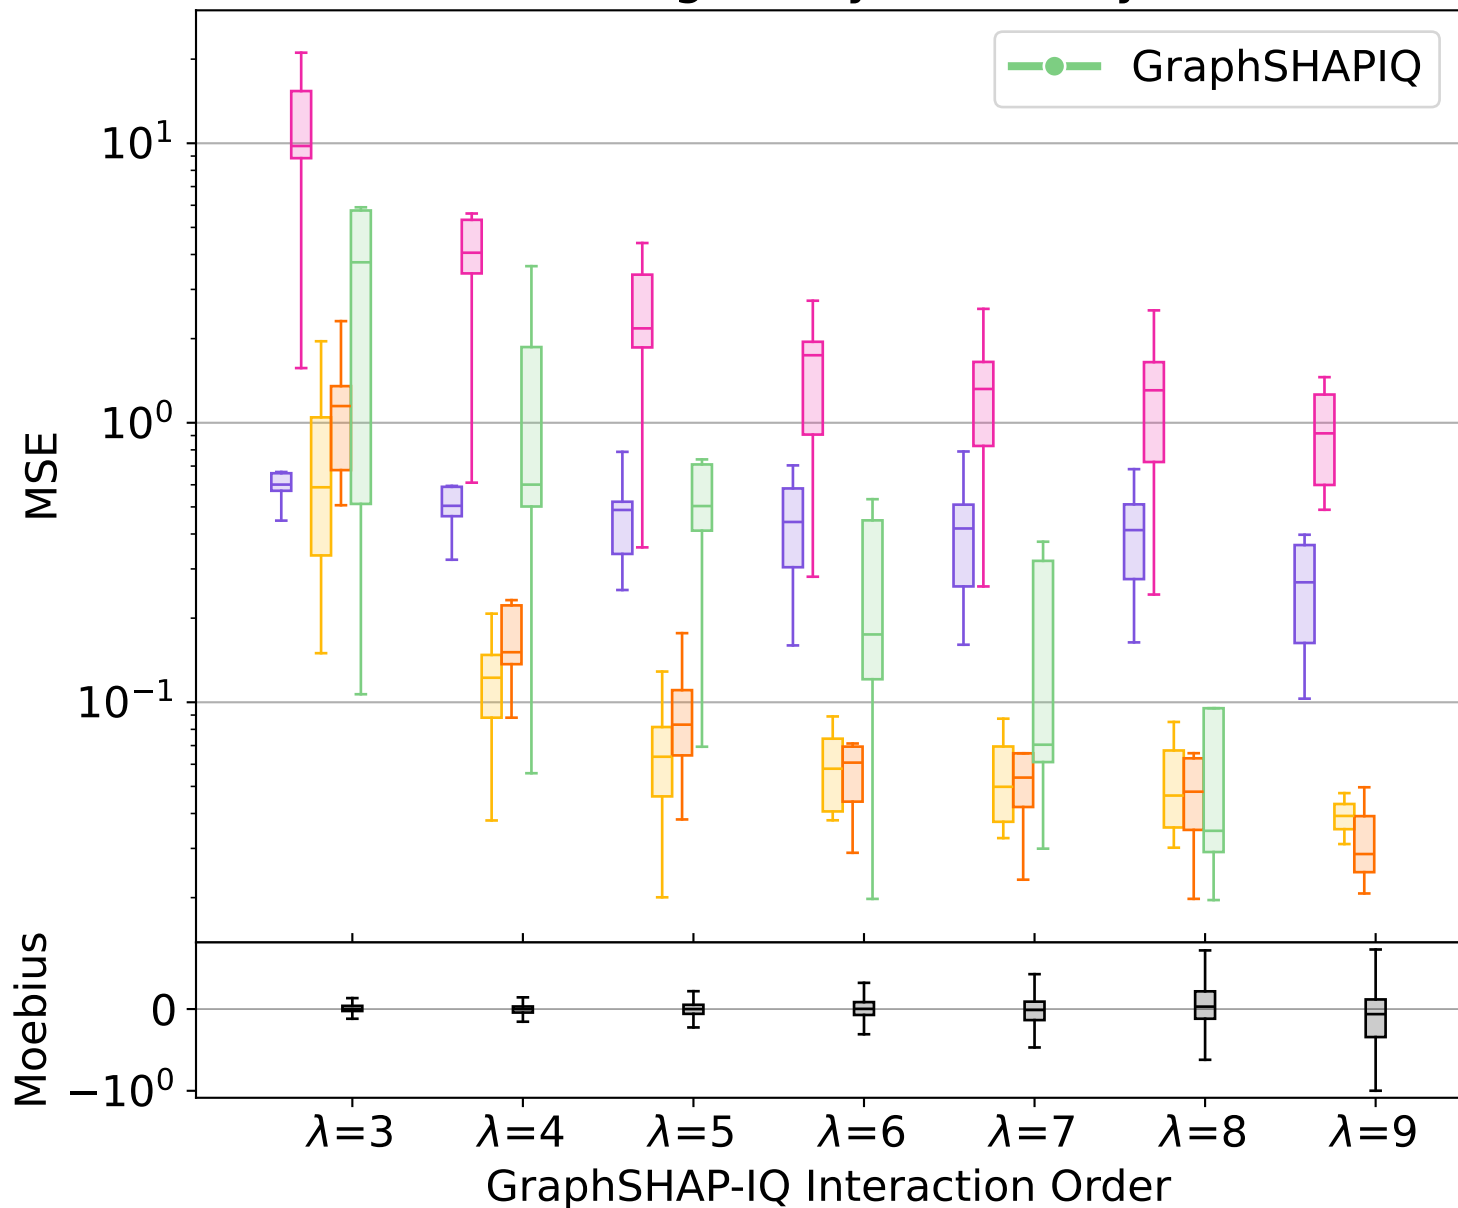

Supplement: supplementary_material [file attachment]

## 2-SII for BZR with 2-layer GIN

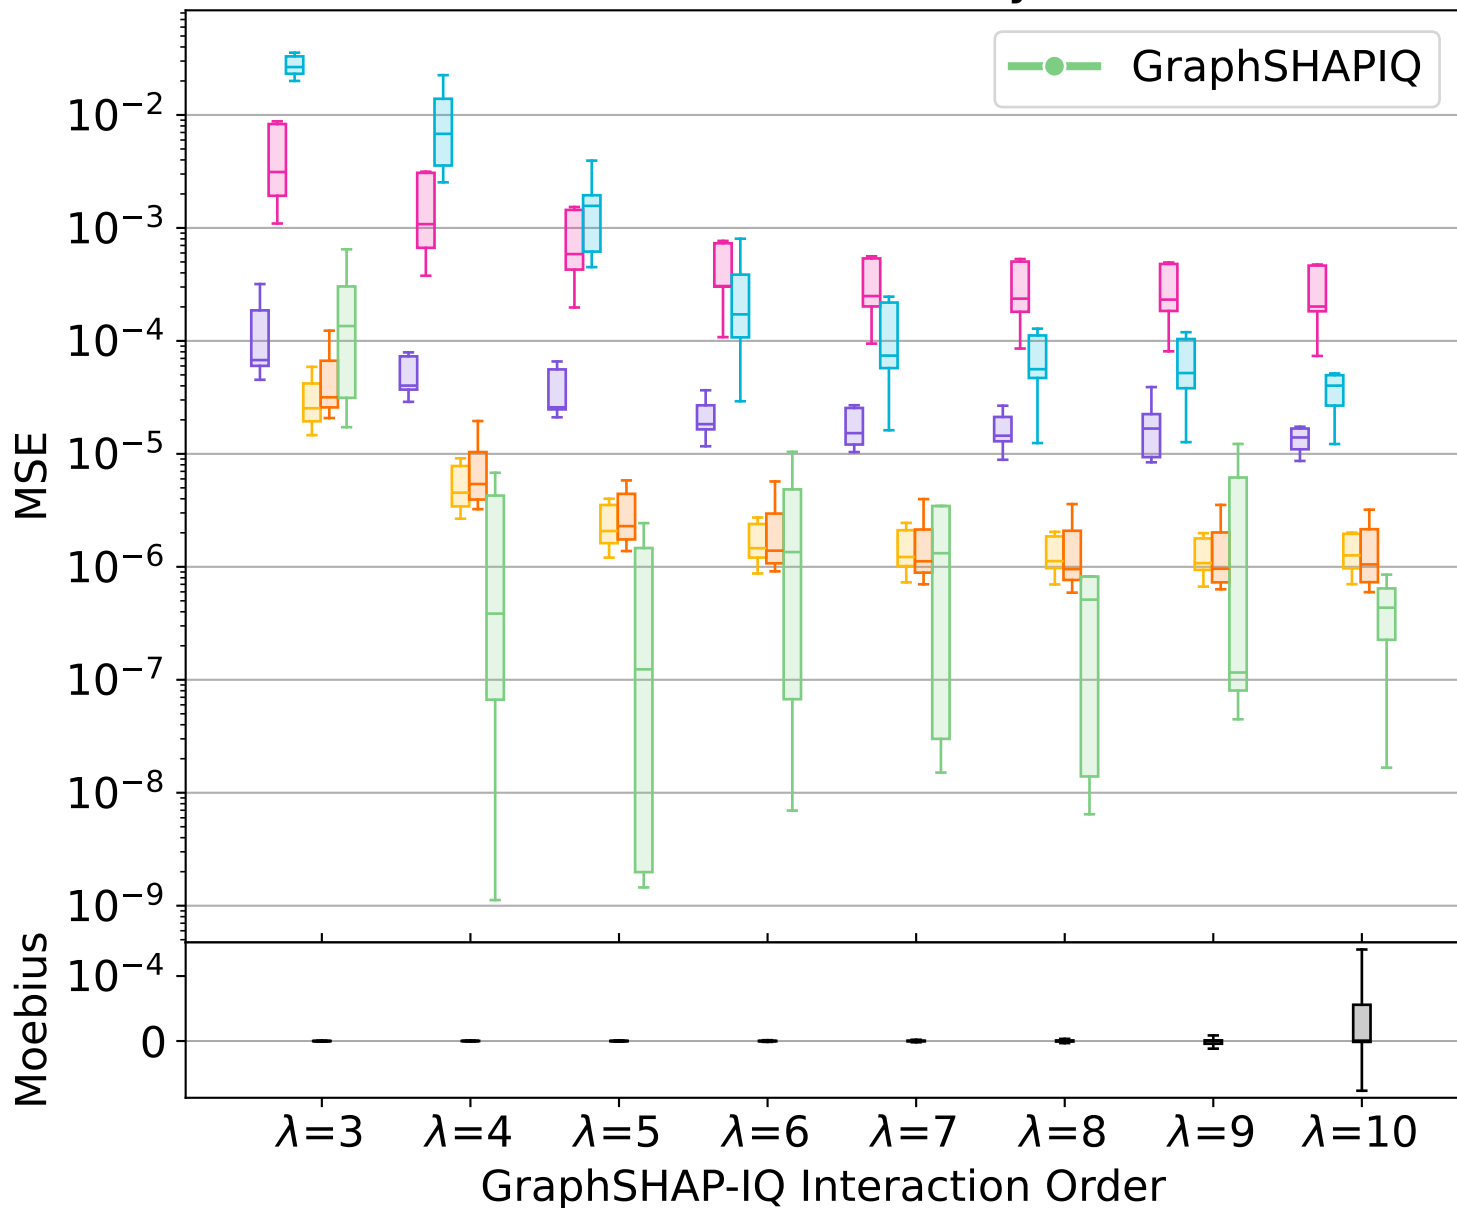

Supplement: supplementary_material [file attachment]

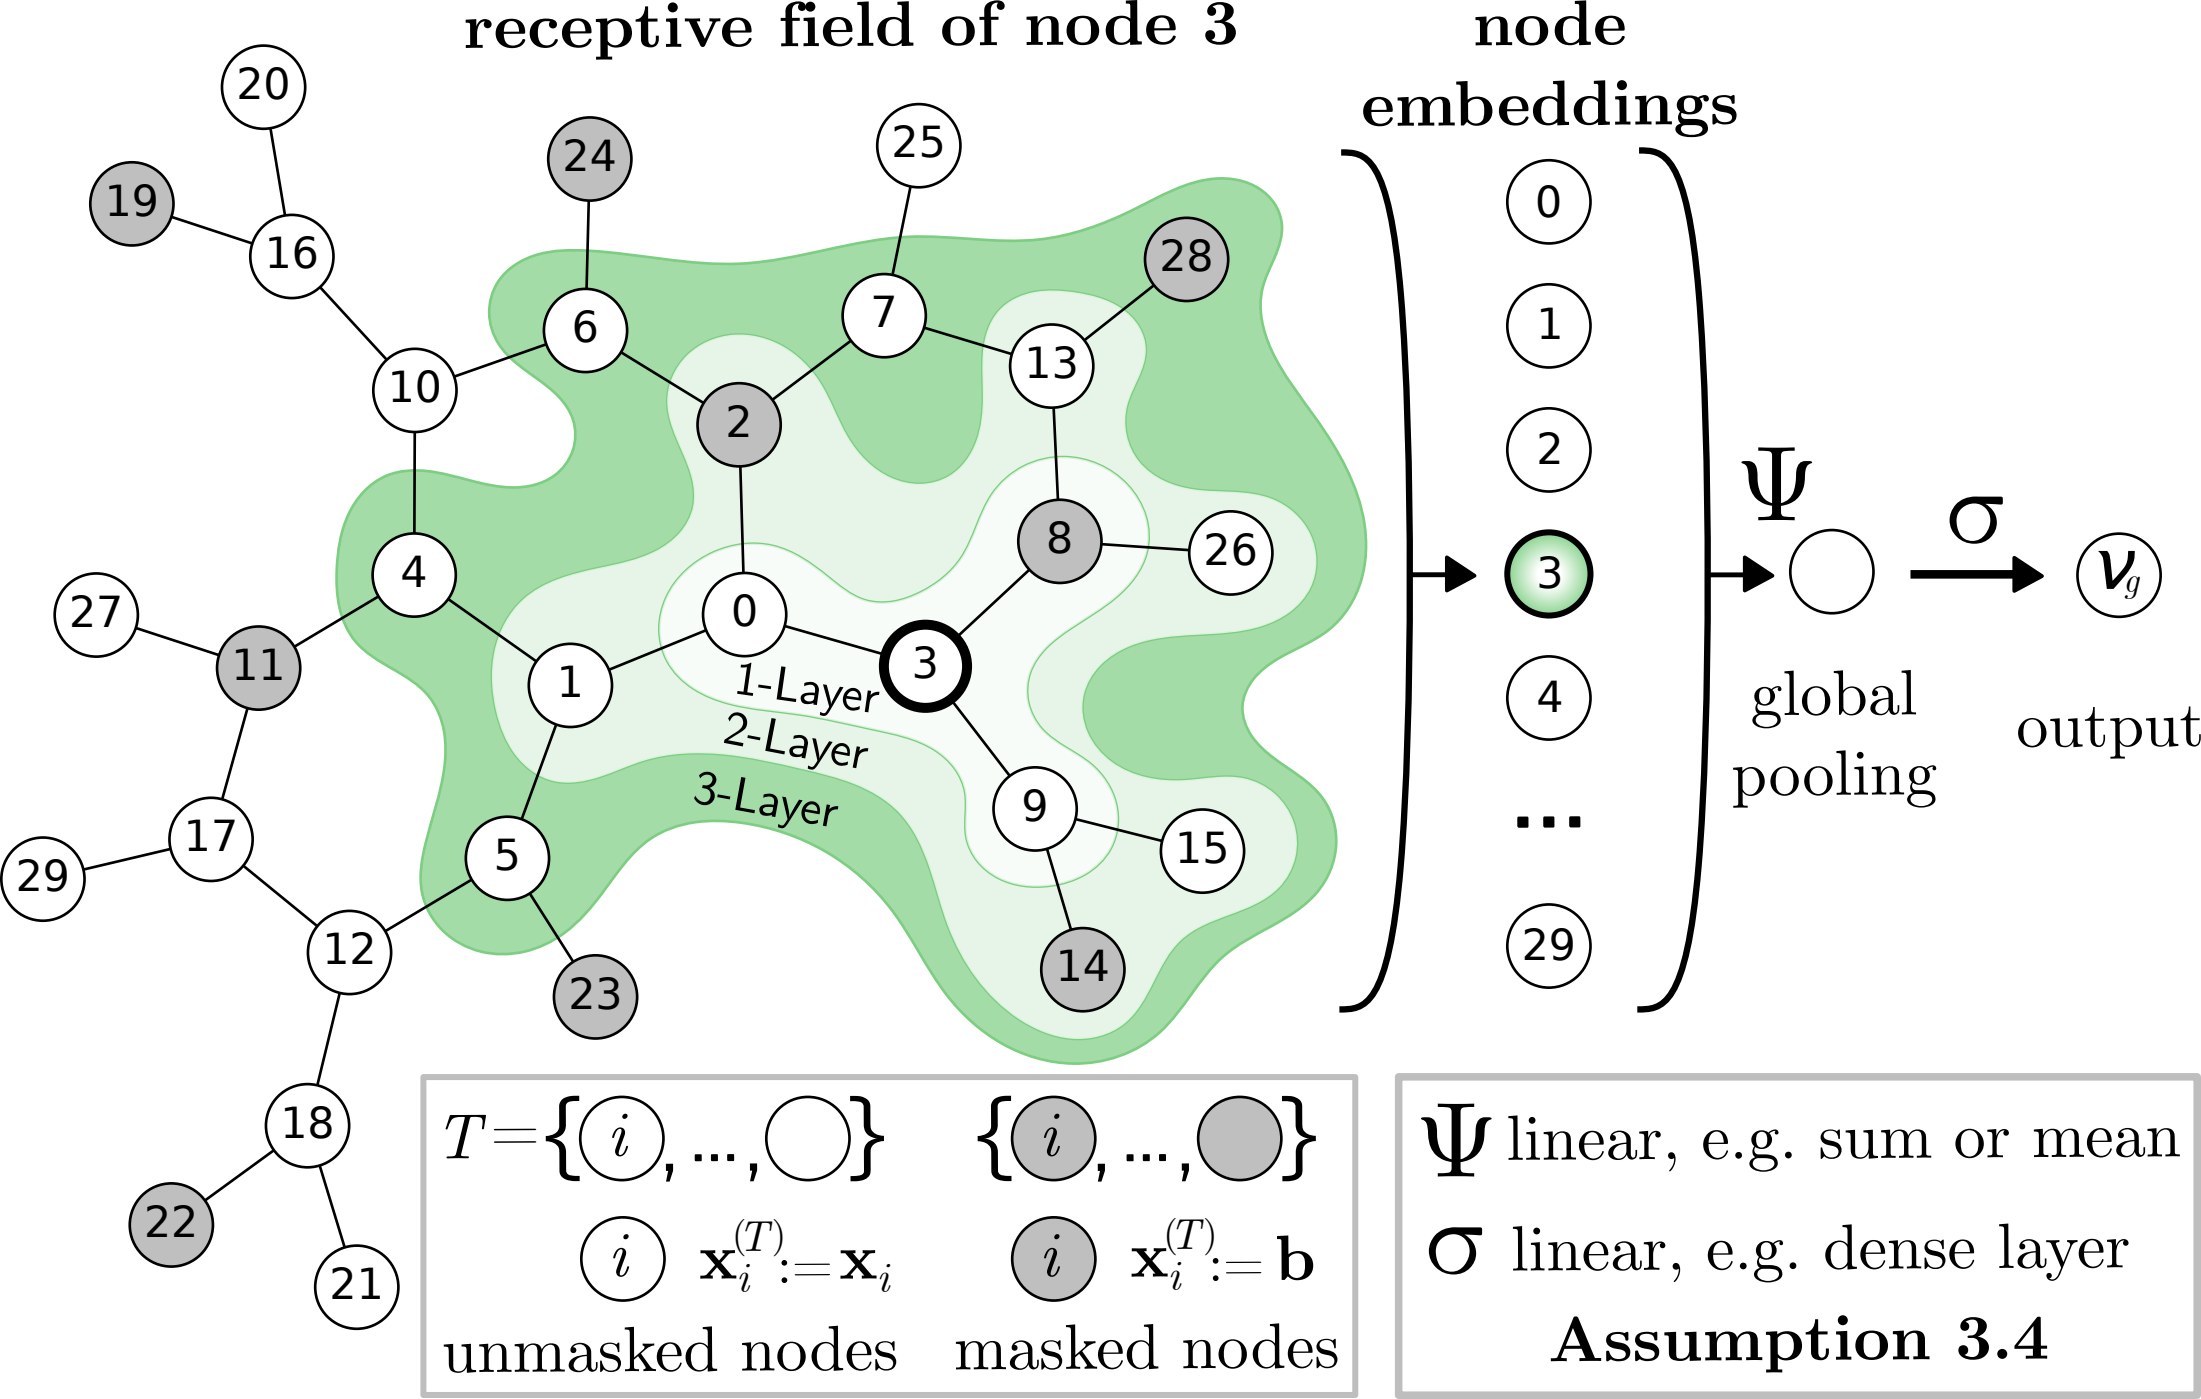

Supplement: supplementary_material [file attachment]

## 2-SII for Mutagenicity with 2-layer GIN

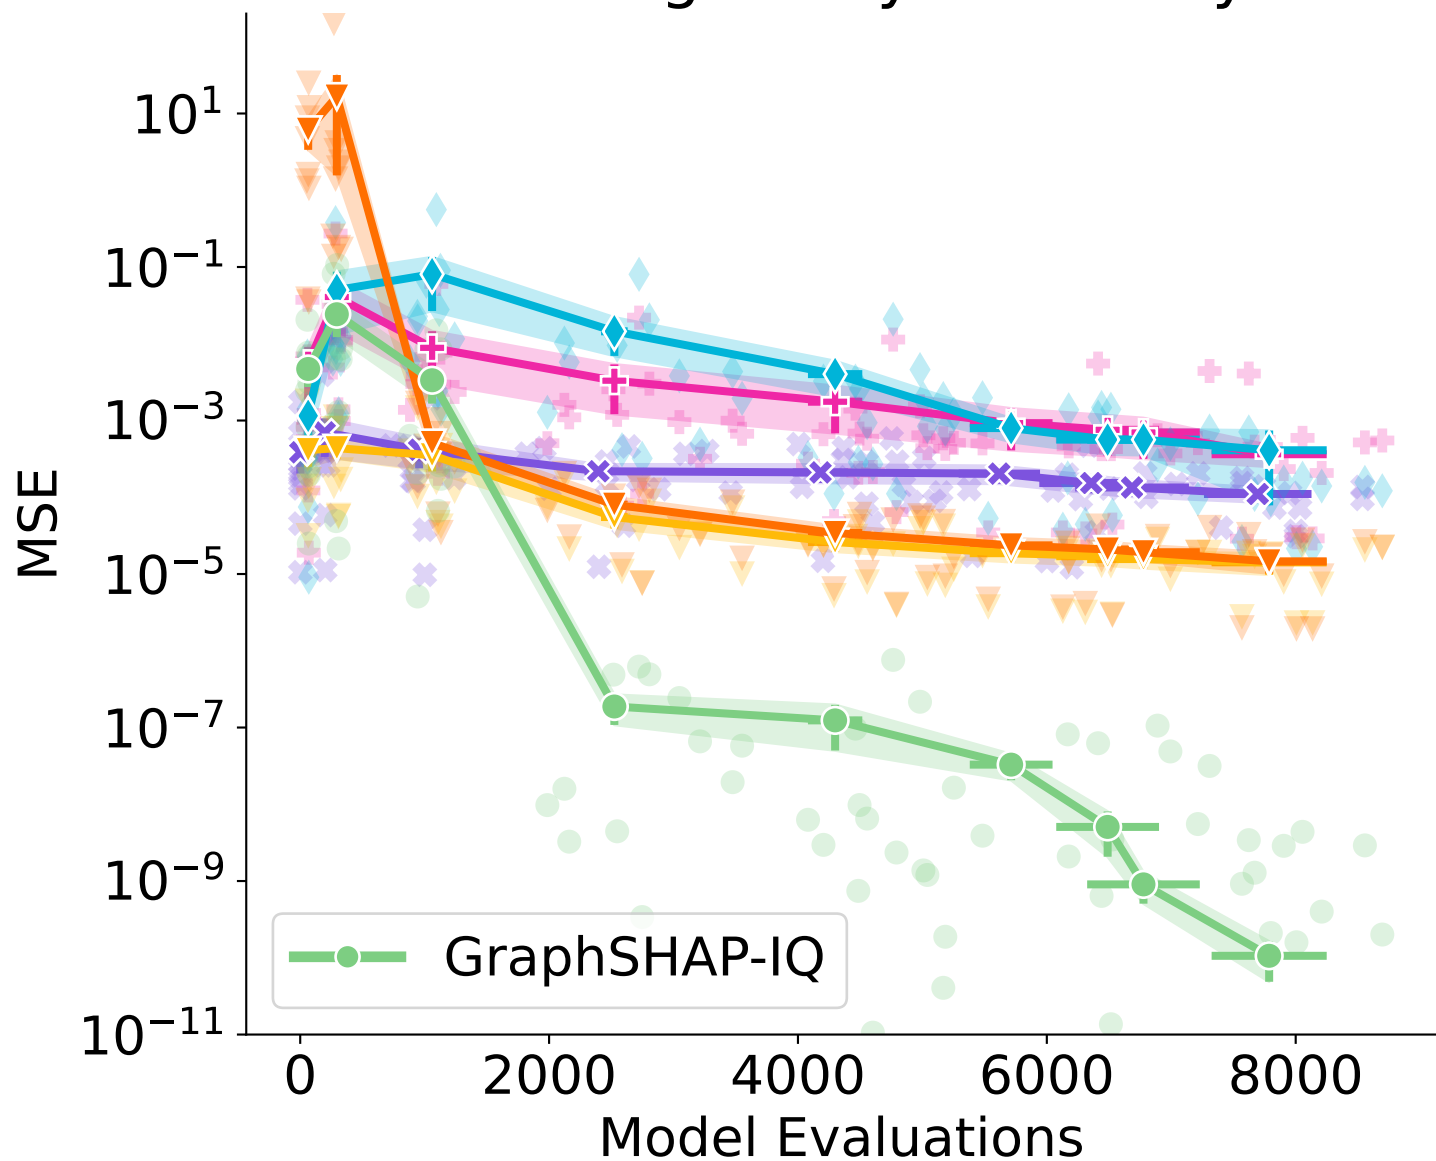

Supplement: supplementary_material [file attachment]

## 2-SII for BZR with 2-layer GIN

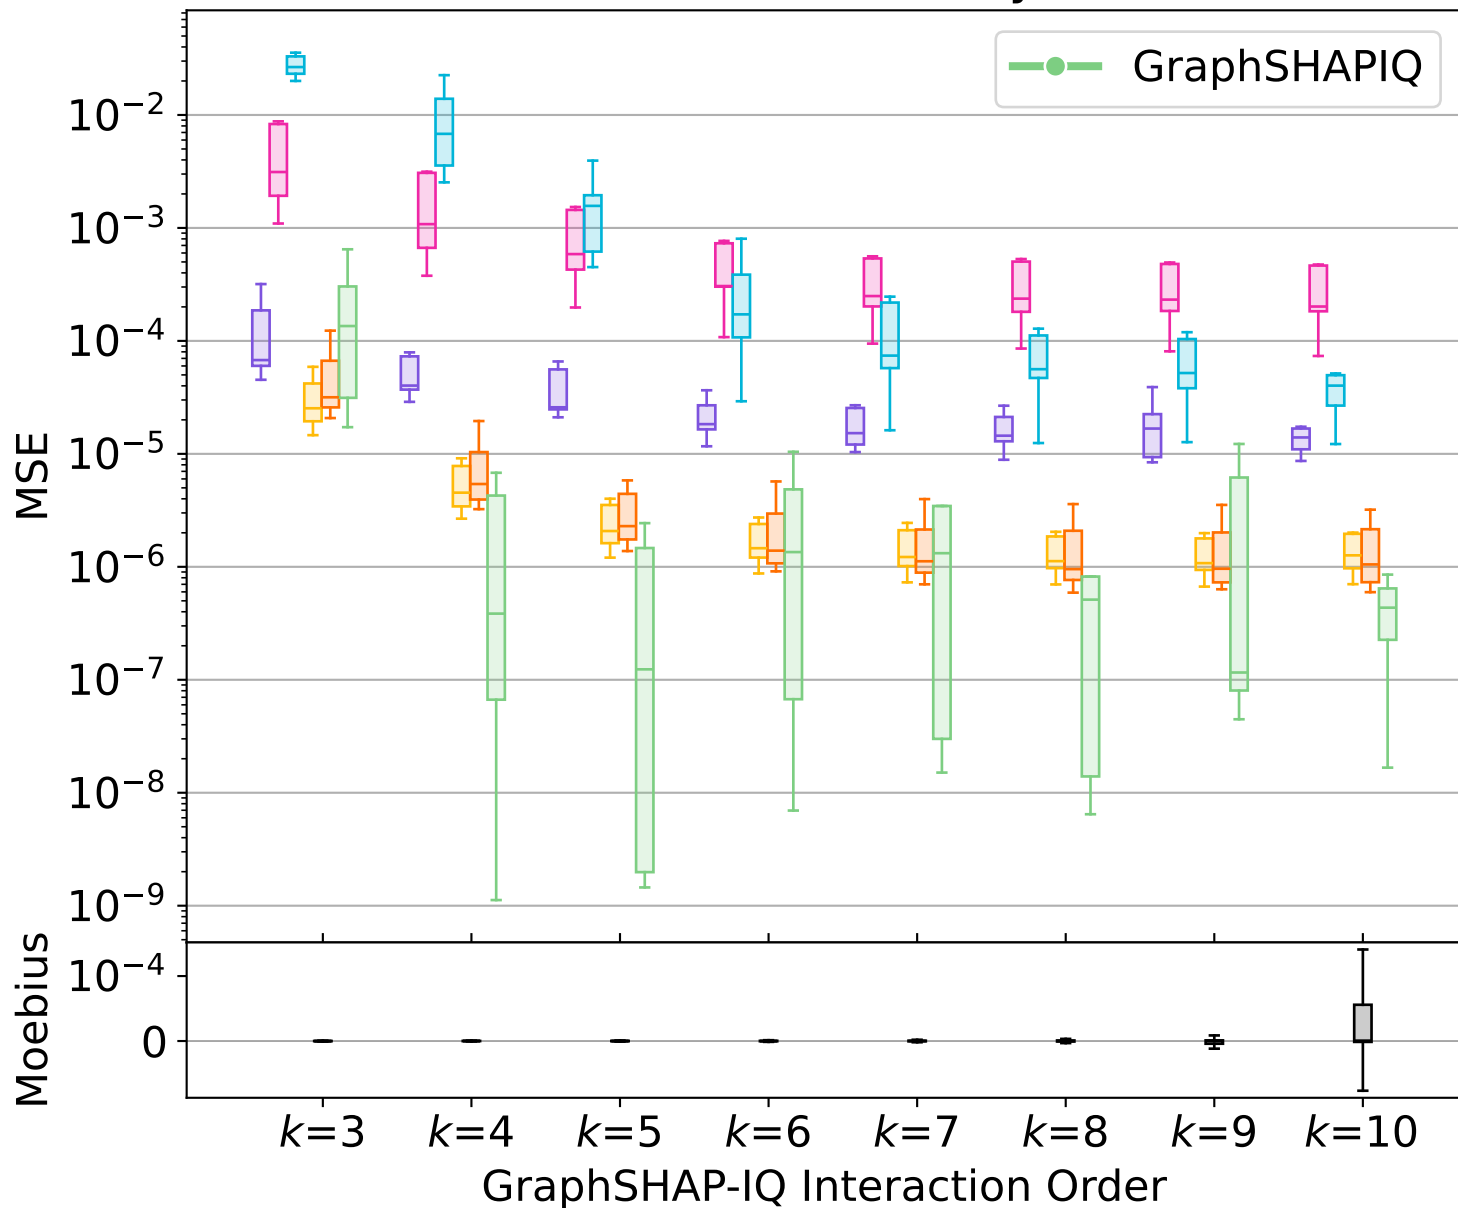

Supplement: supplementary_material [file attachment]

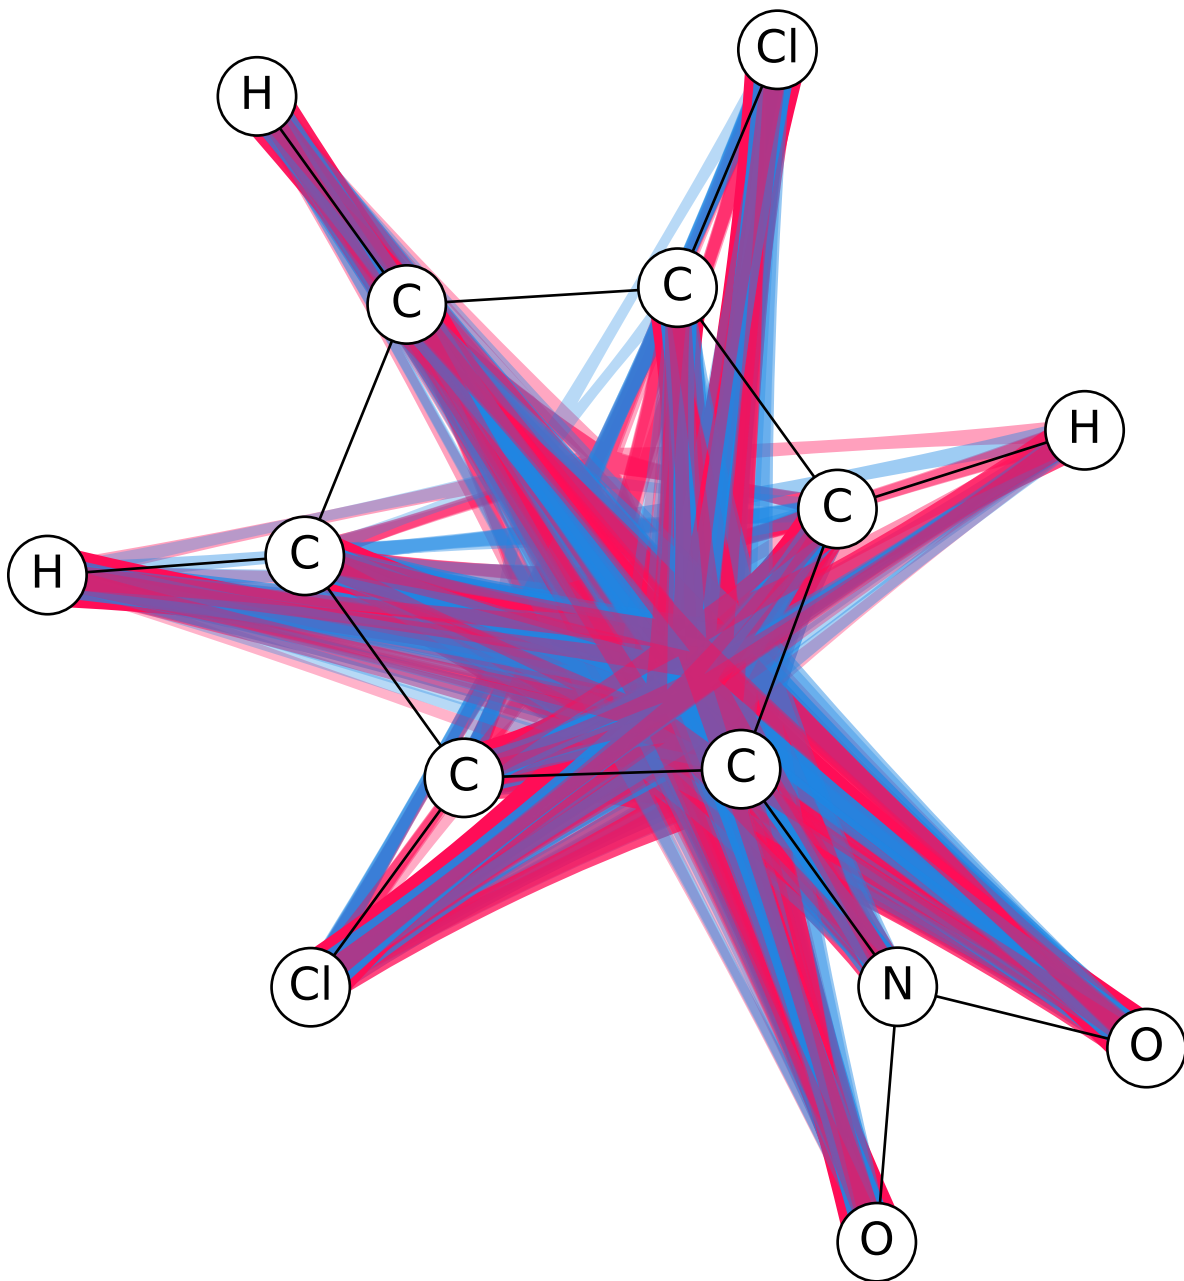

Supplement: supplementary_material [file attachment]

## 2-SII for Mutagenicity with 2-layer GIN

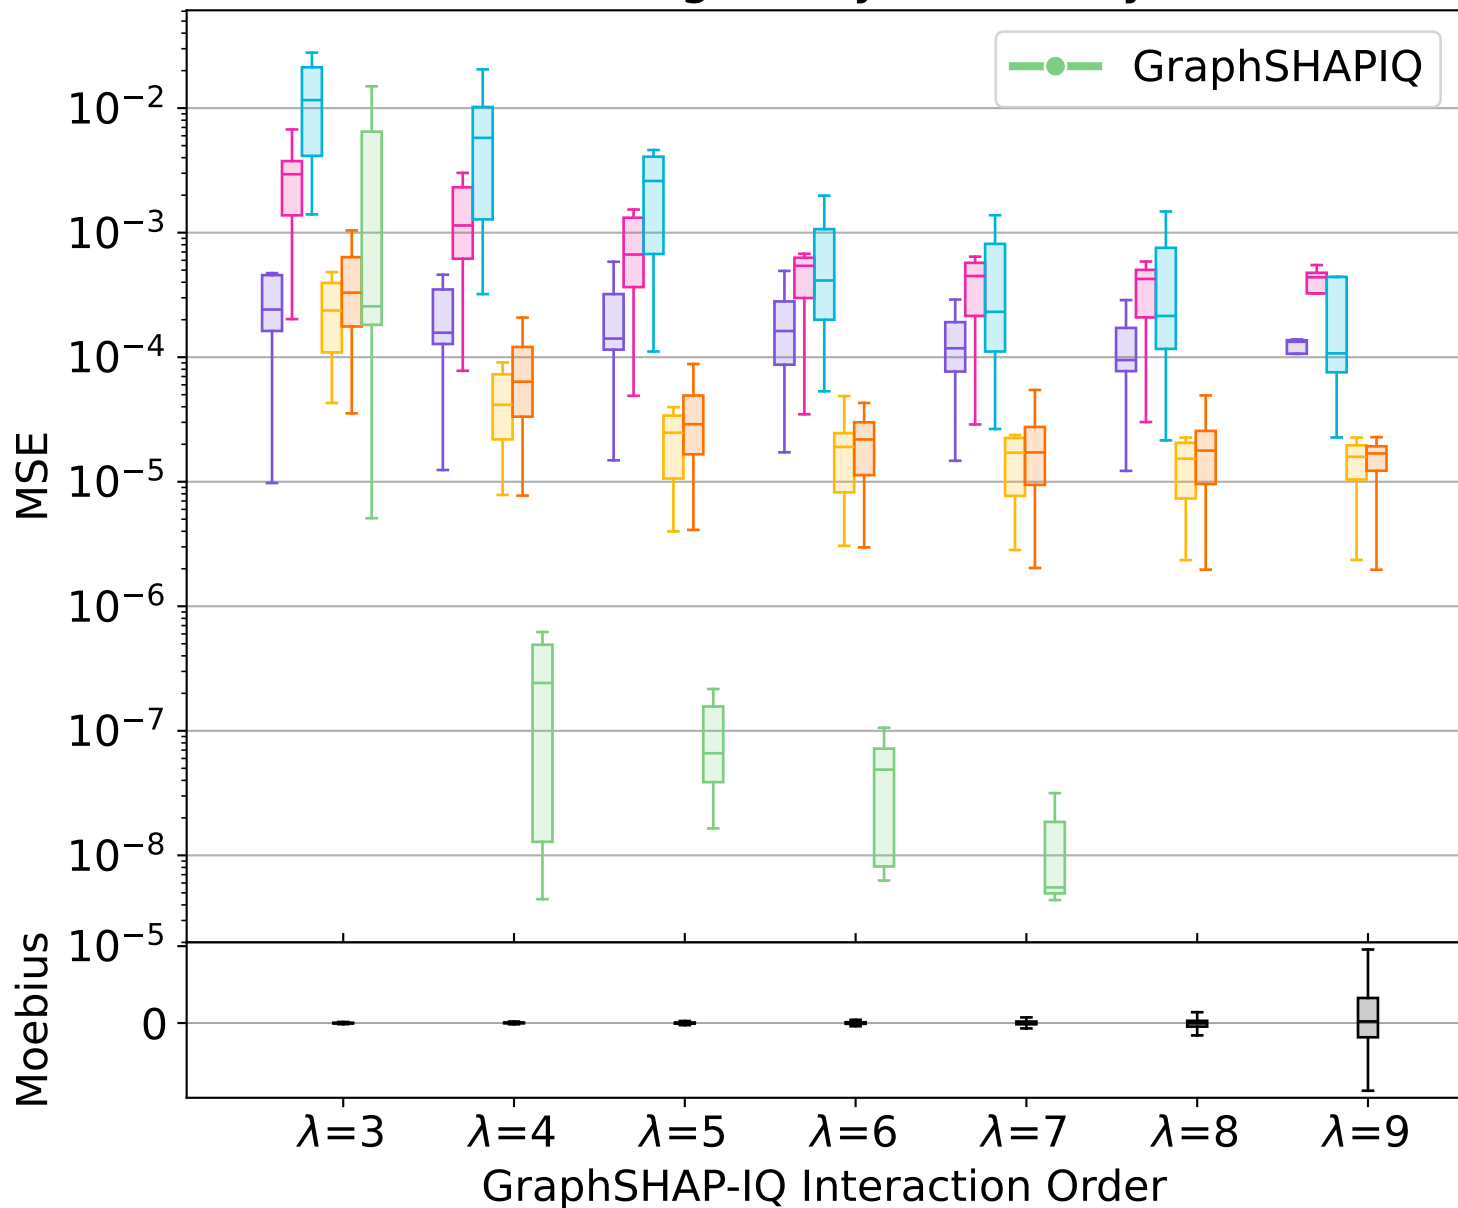

Supplement: supplementary_material [file attachment]

# Mutagenicity with 2-layer GIN



Supplement: supplementary_material [file attachment]

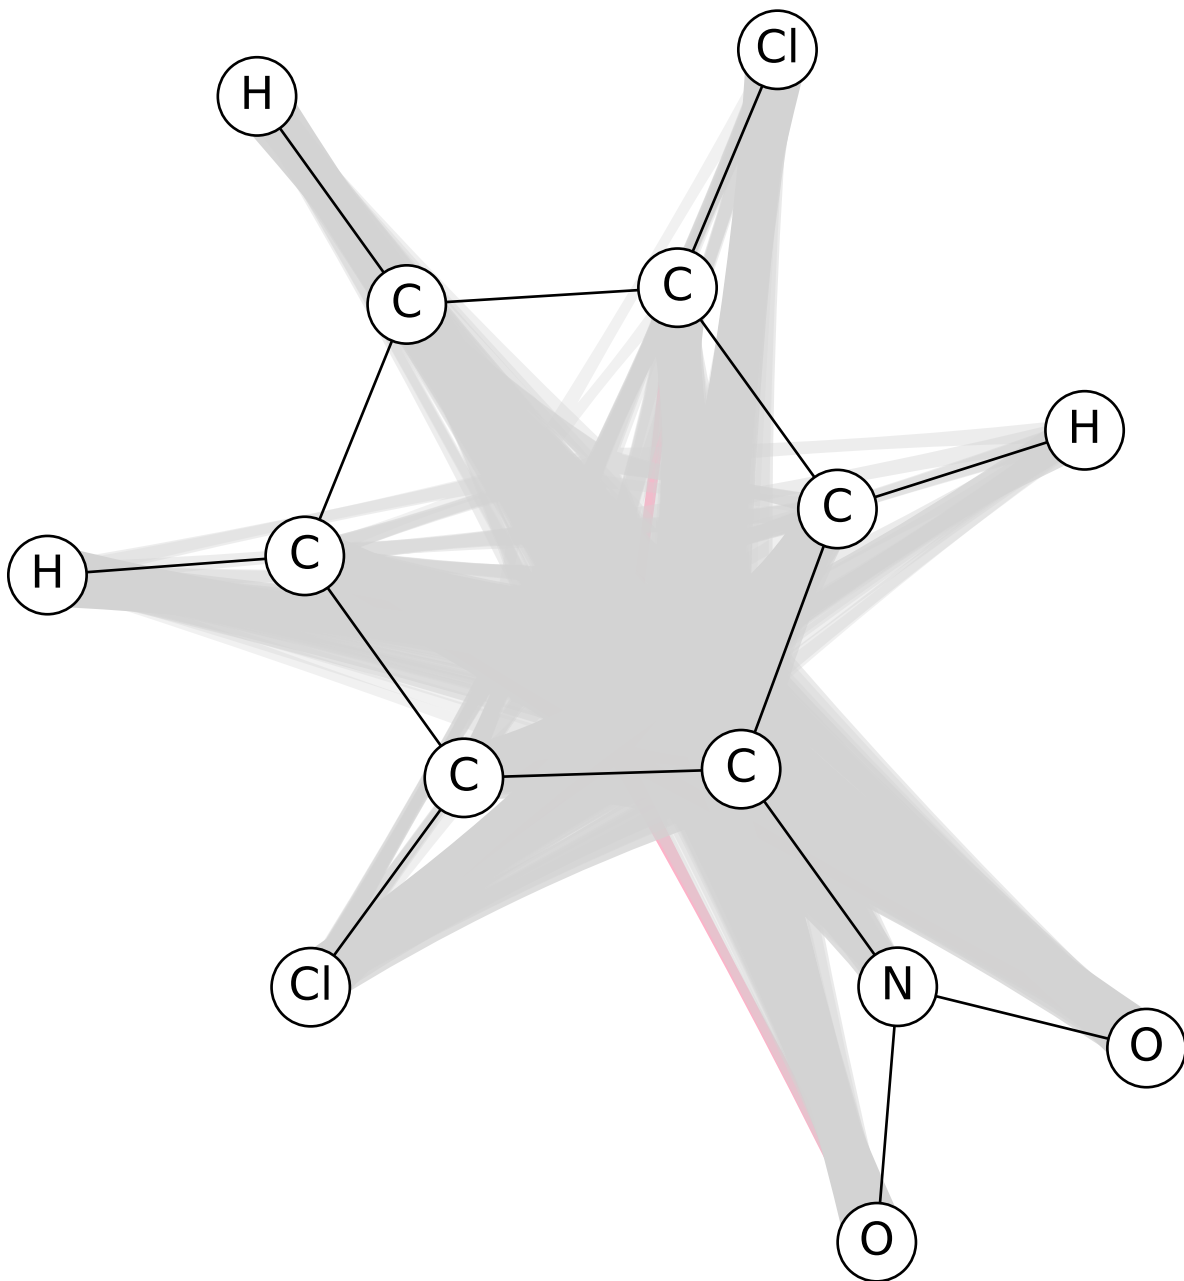

Supplement: supplementary_material [file attachment]

# SV for Mutagenicity with 2-layer GAT

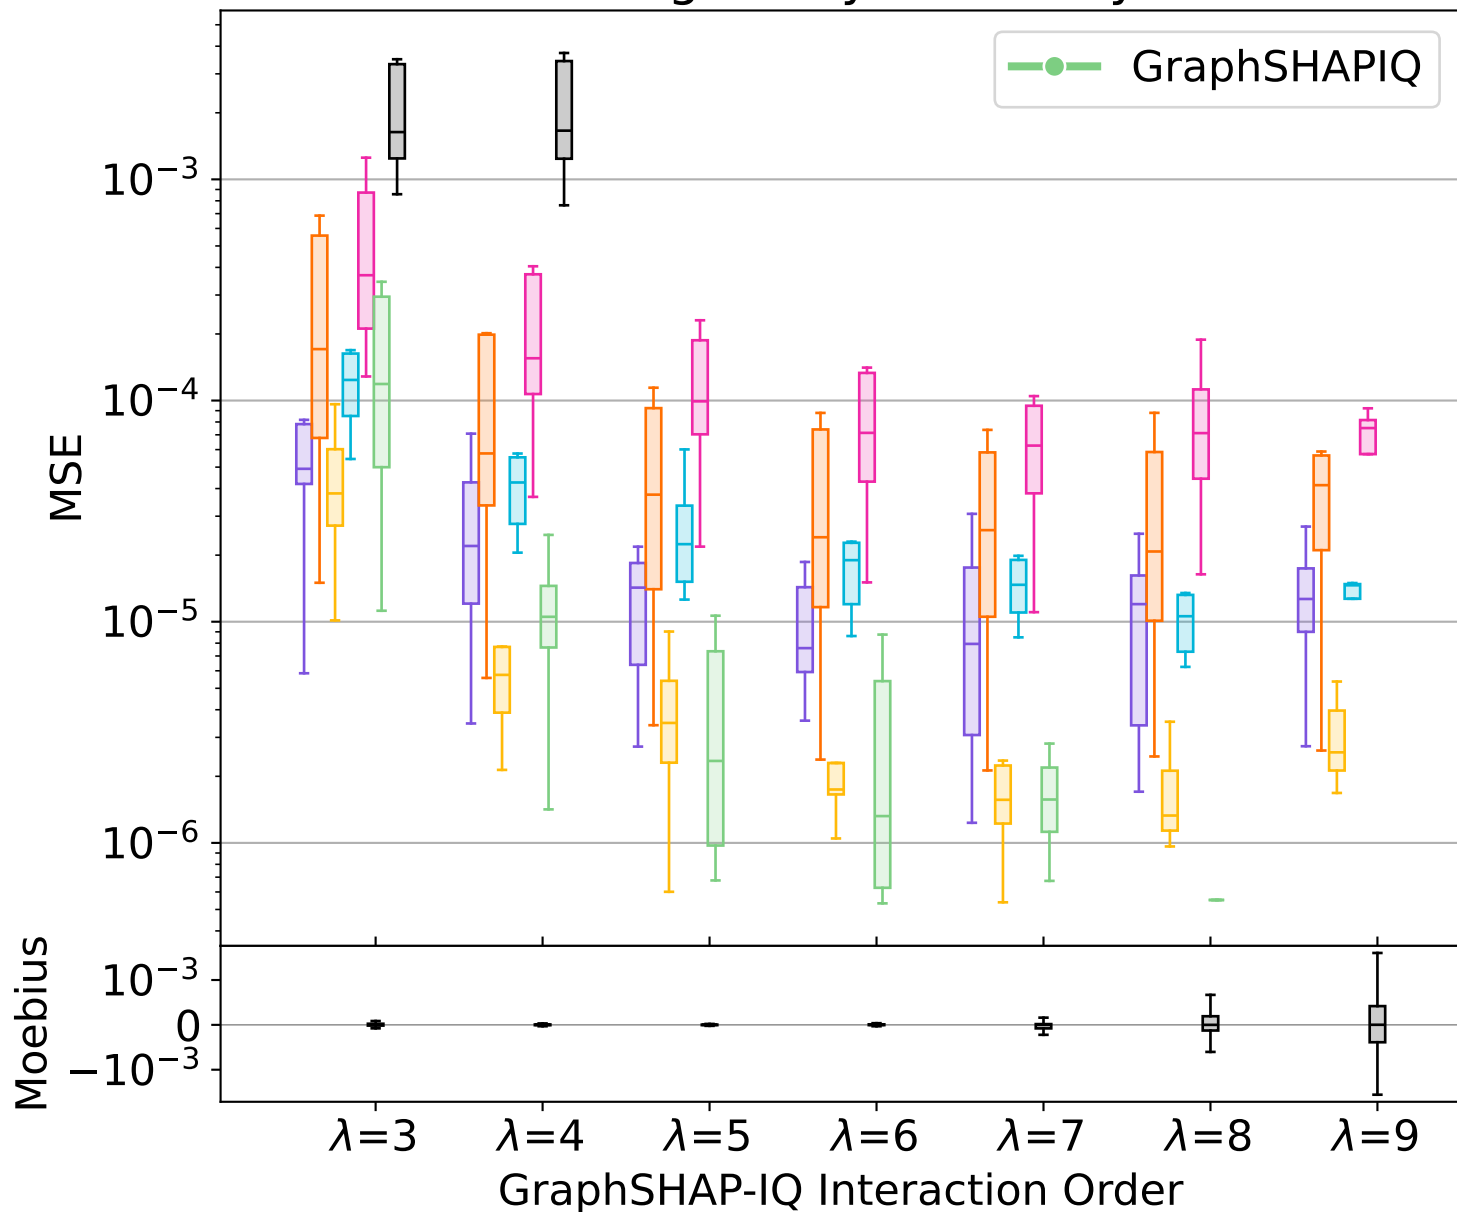

Supplement: supplementary_material [file attachment]

# SV for Mutagenicity with 2-layer GAT

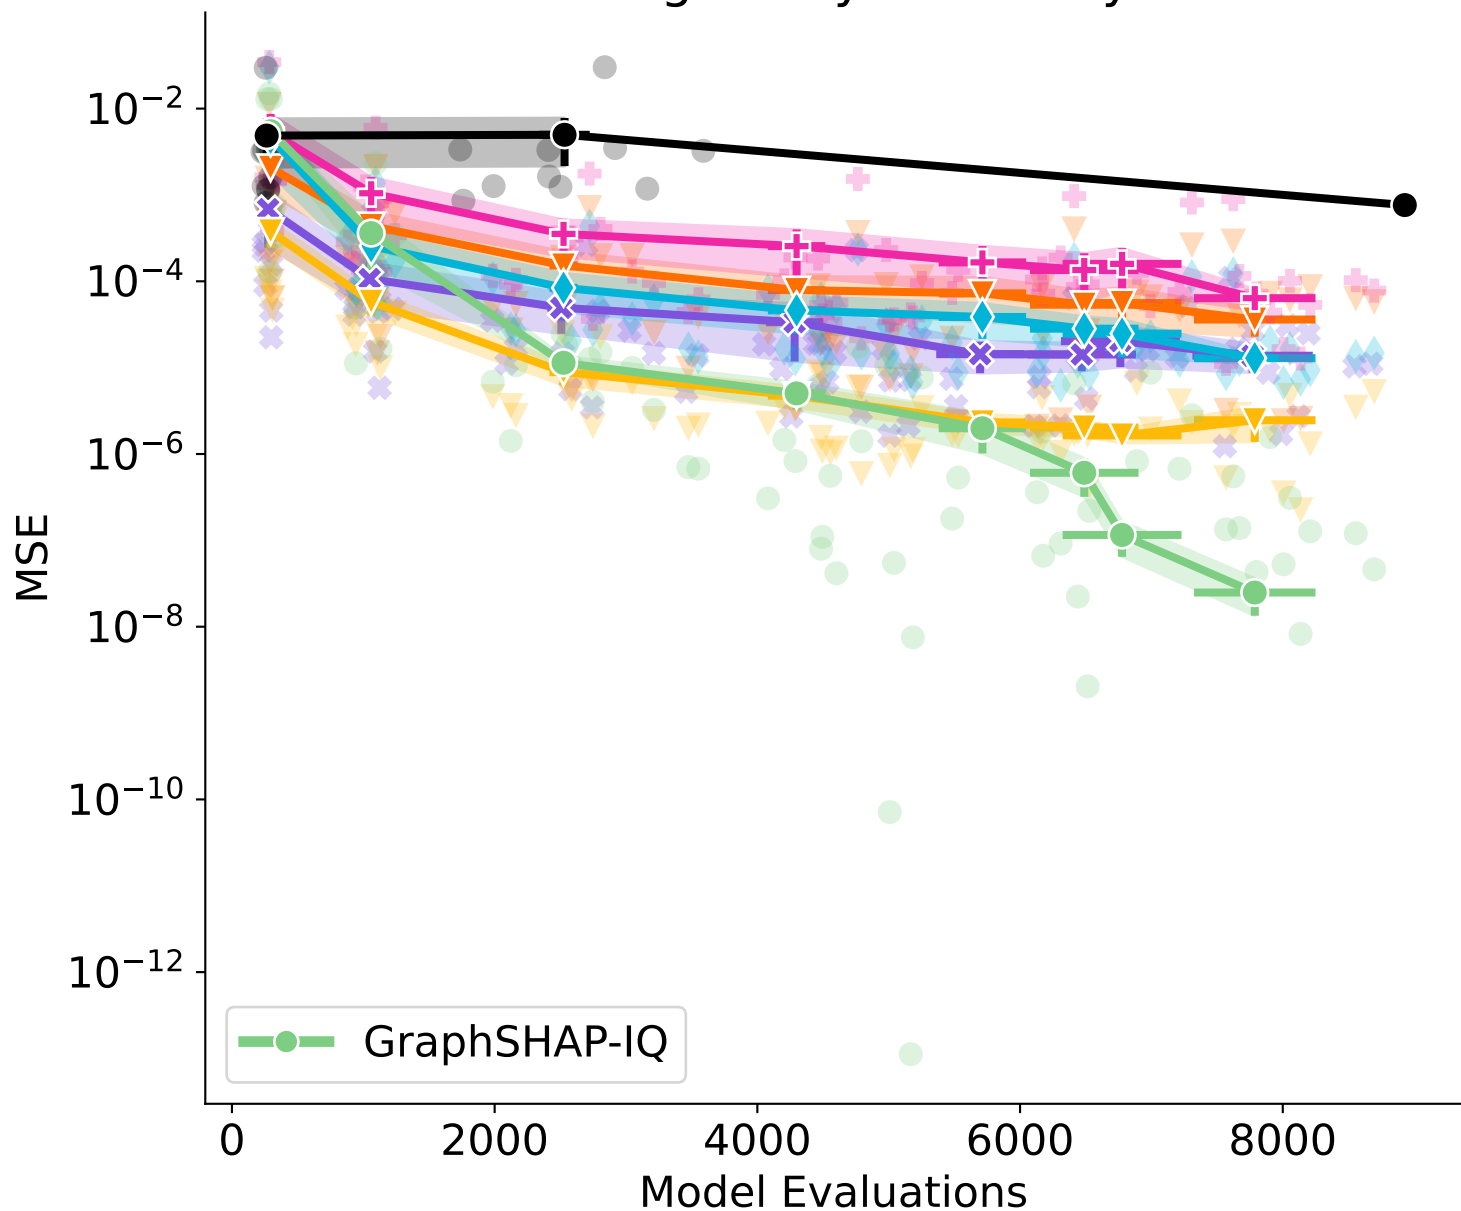

Supplement: supplementary_material [file attachment]

## 2-SII for Mutagenicity with 2-layer GAT

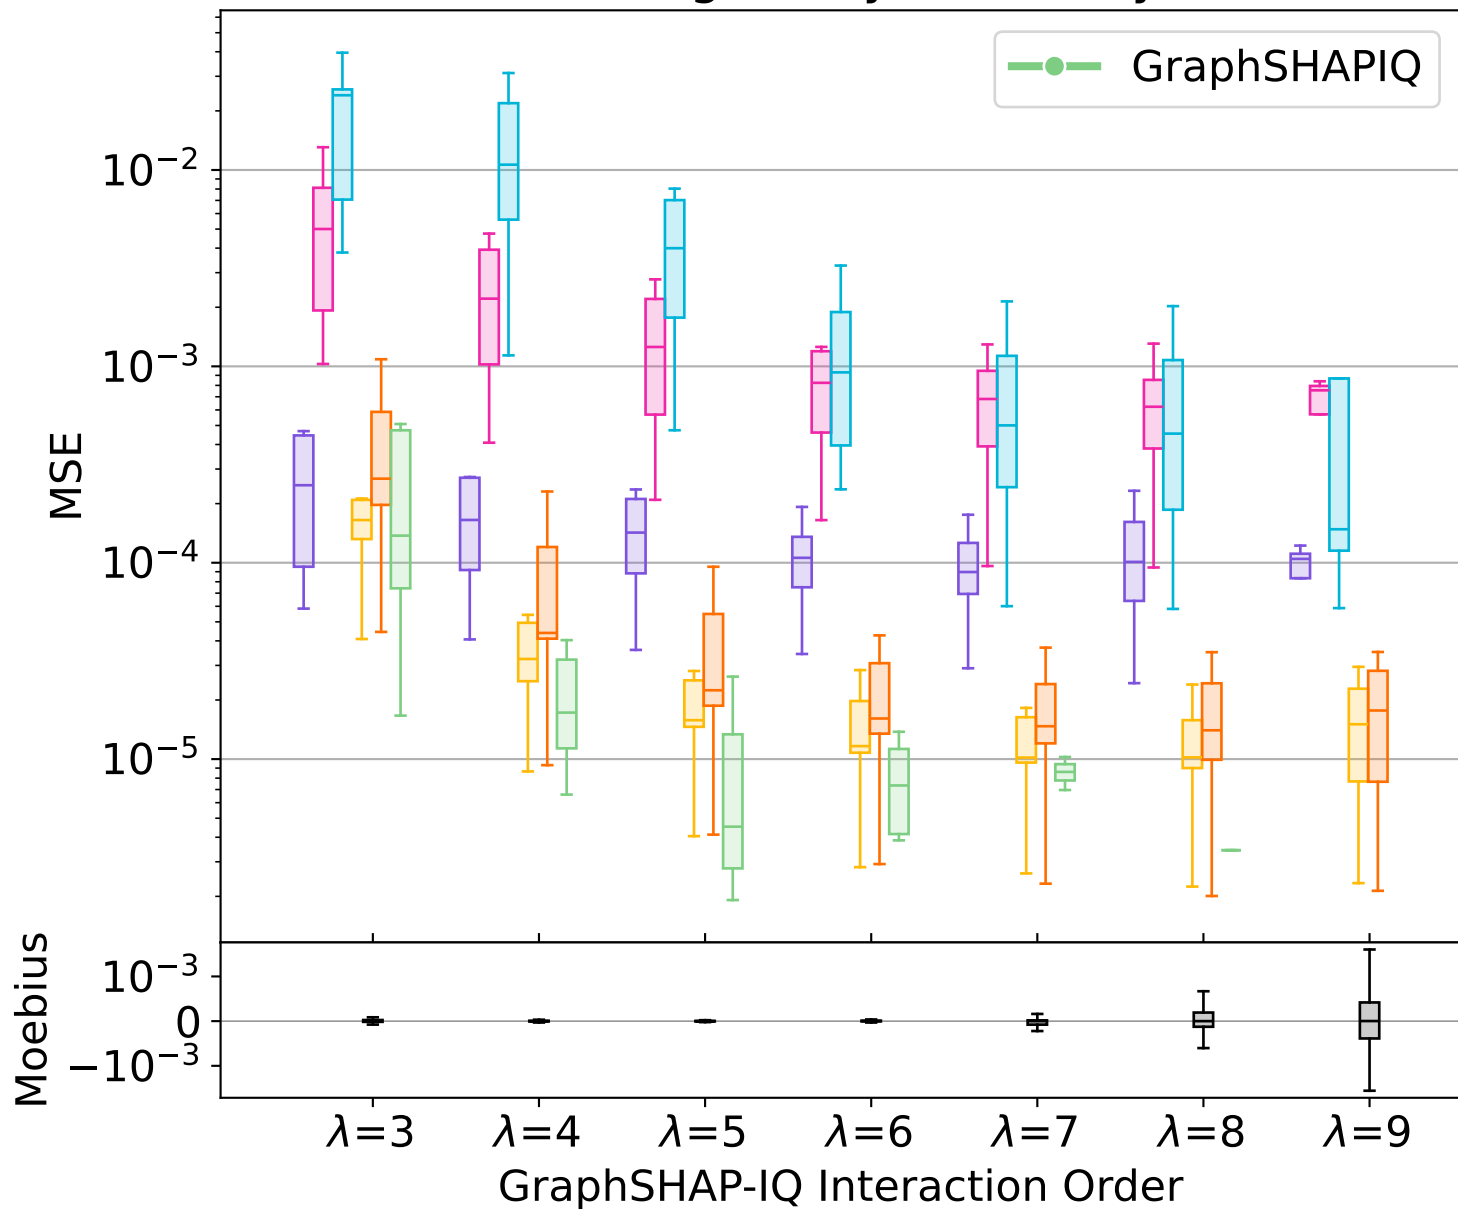

Supplement: supplementary_material [file attachment]

## 2-SII for BZR with 2-layer GAT

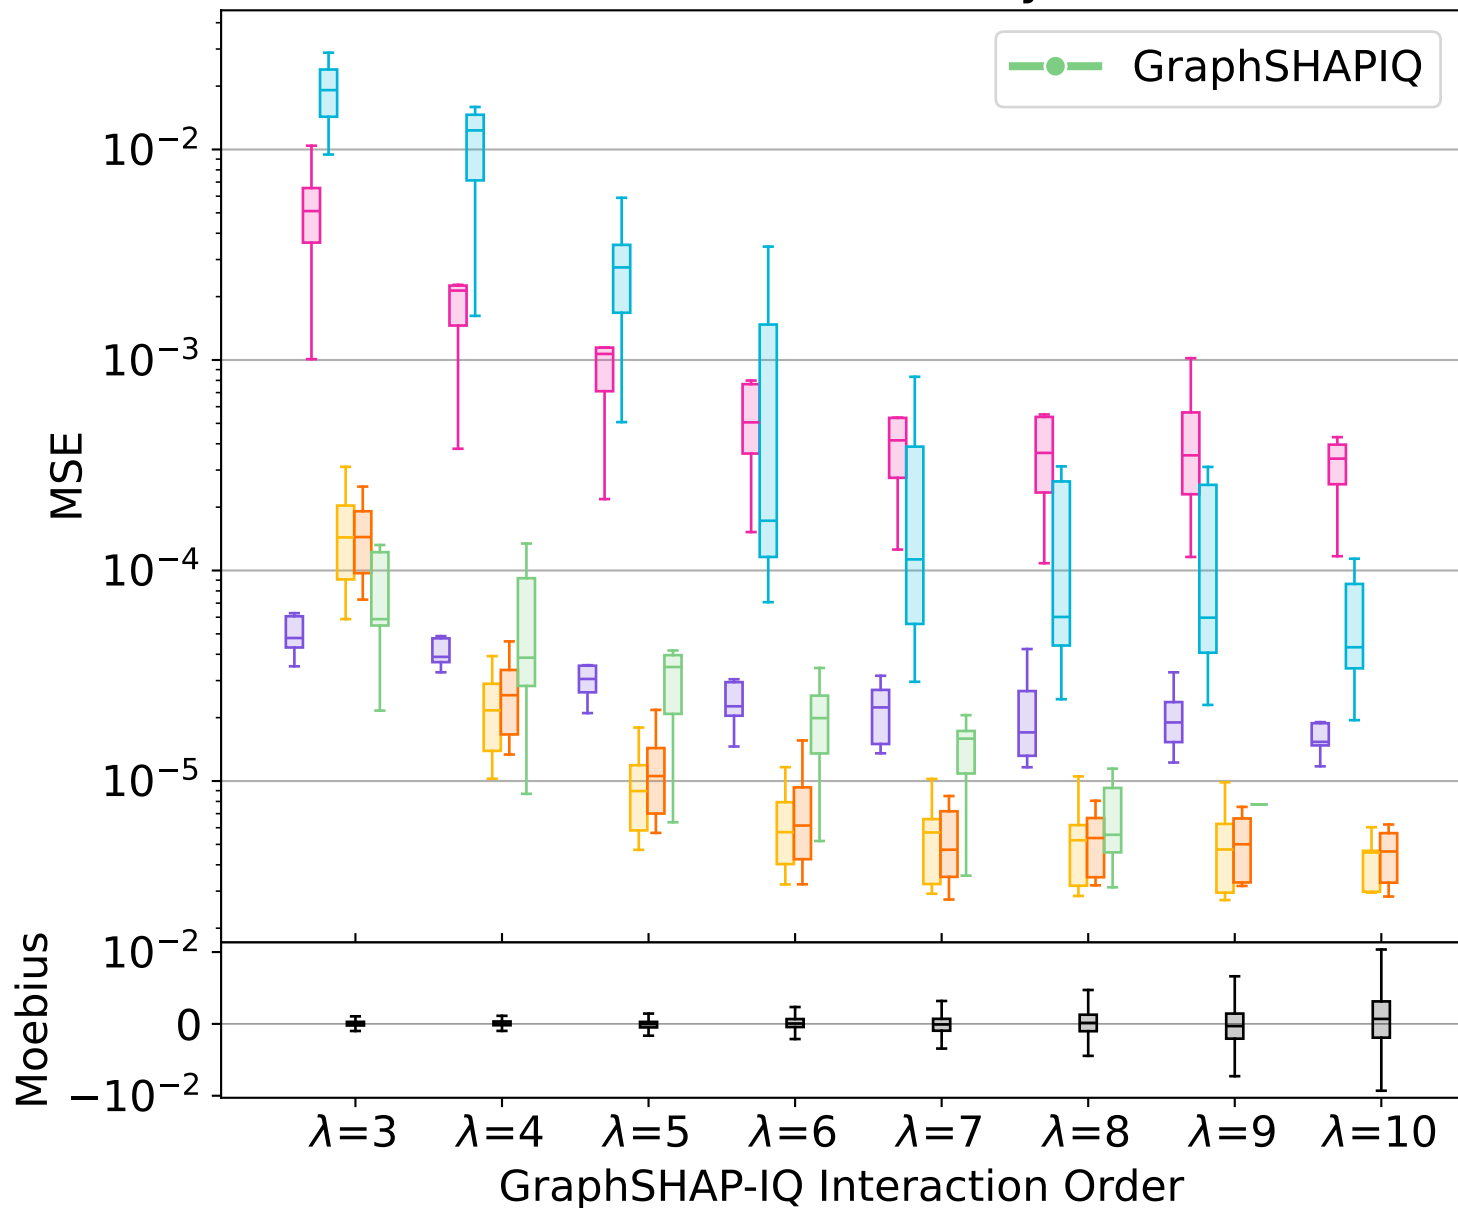

Supplement: supplementary_material [file attachment]

## 2-SII for PROTEINS with 2-layer GAT

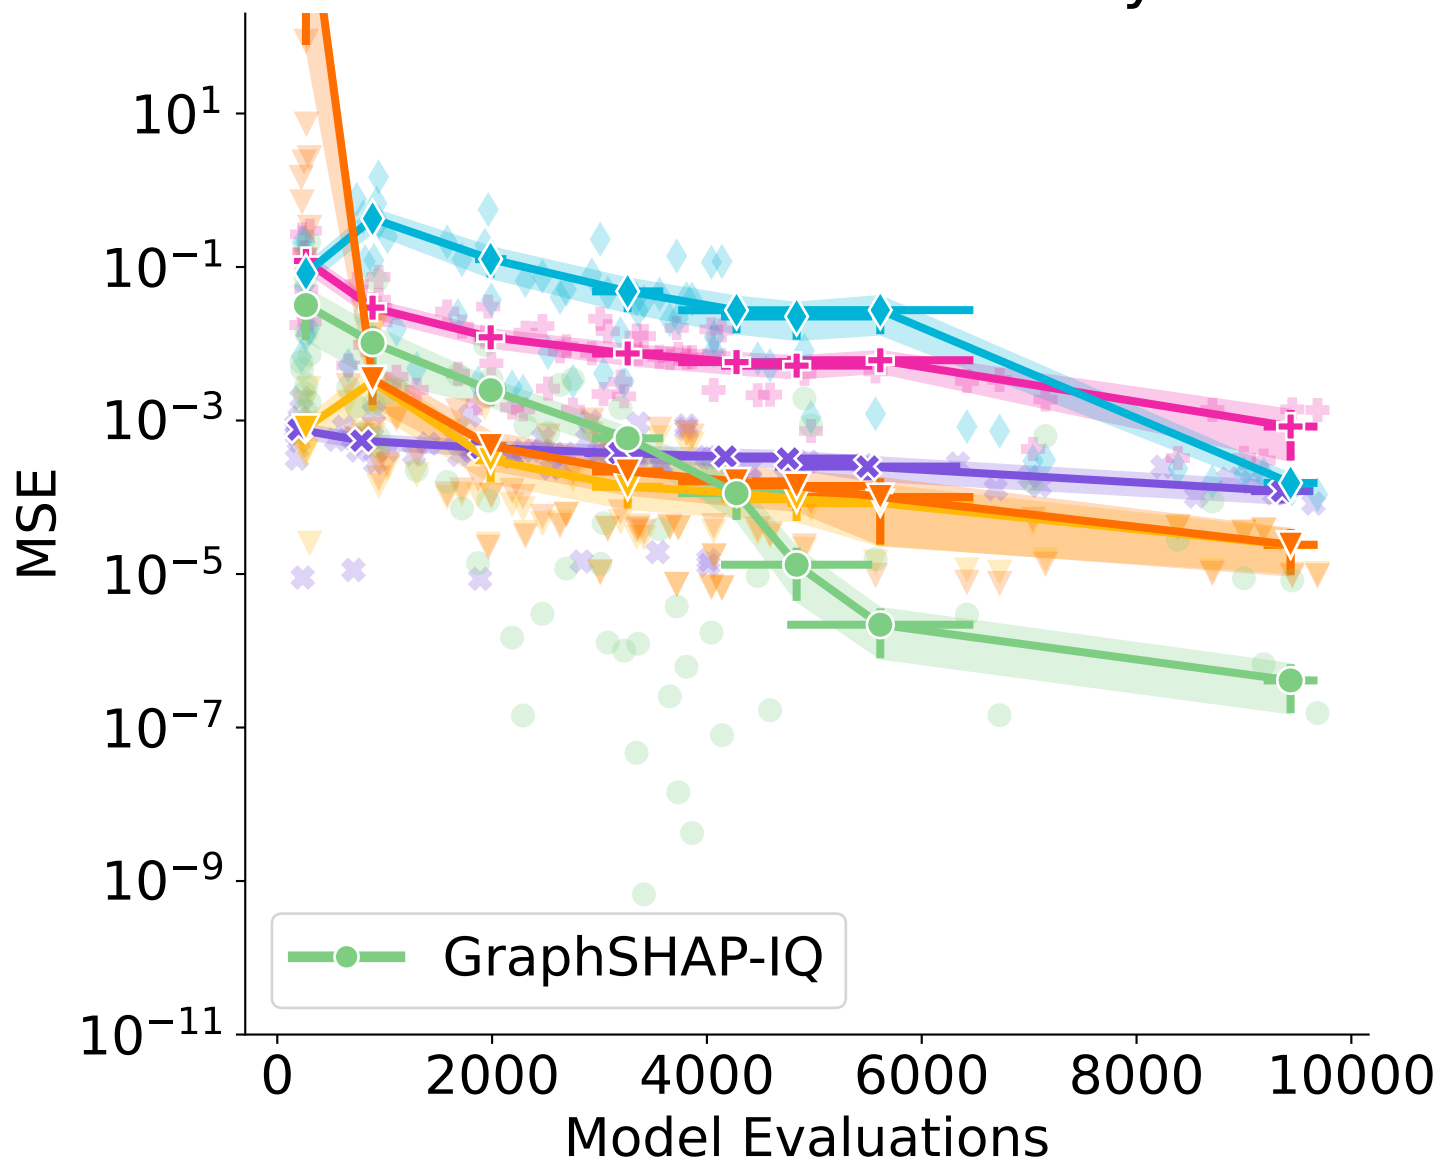

Supplement: supplementary_material [file attachment]



Supplement: supplementary_material [file attachment]

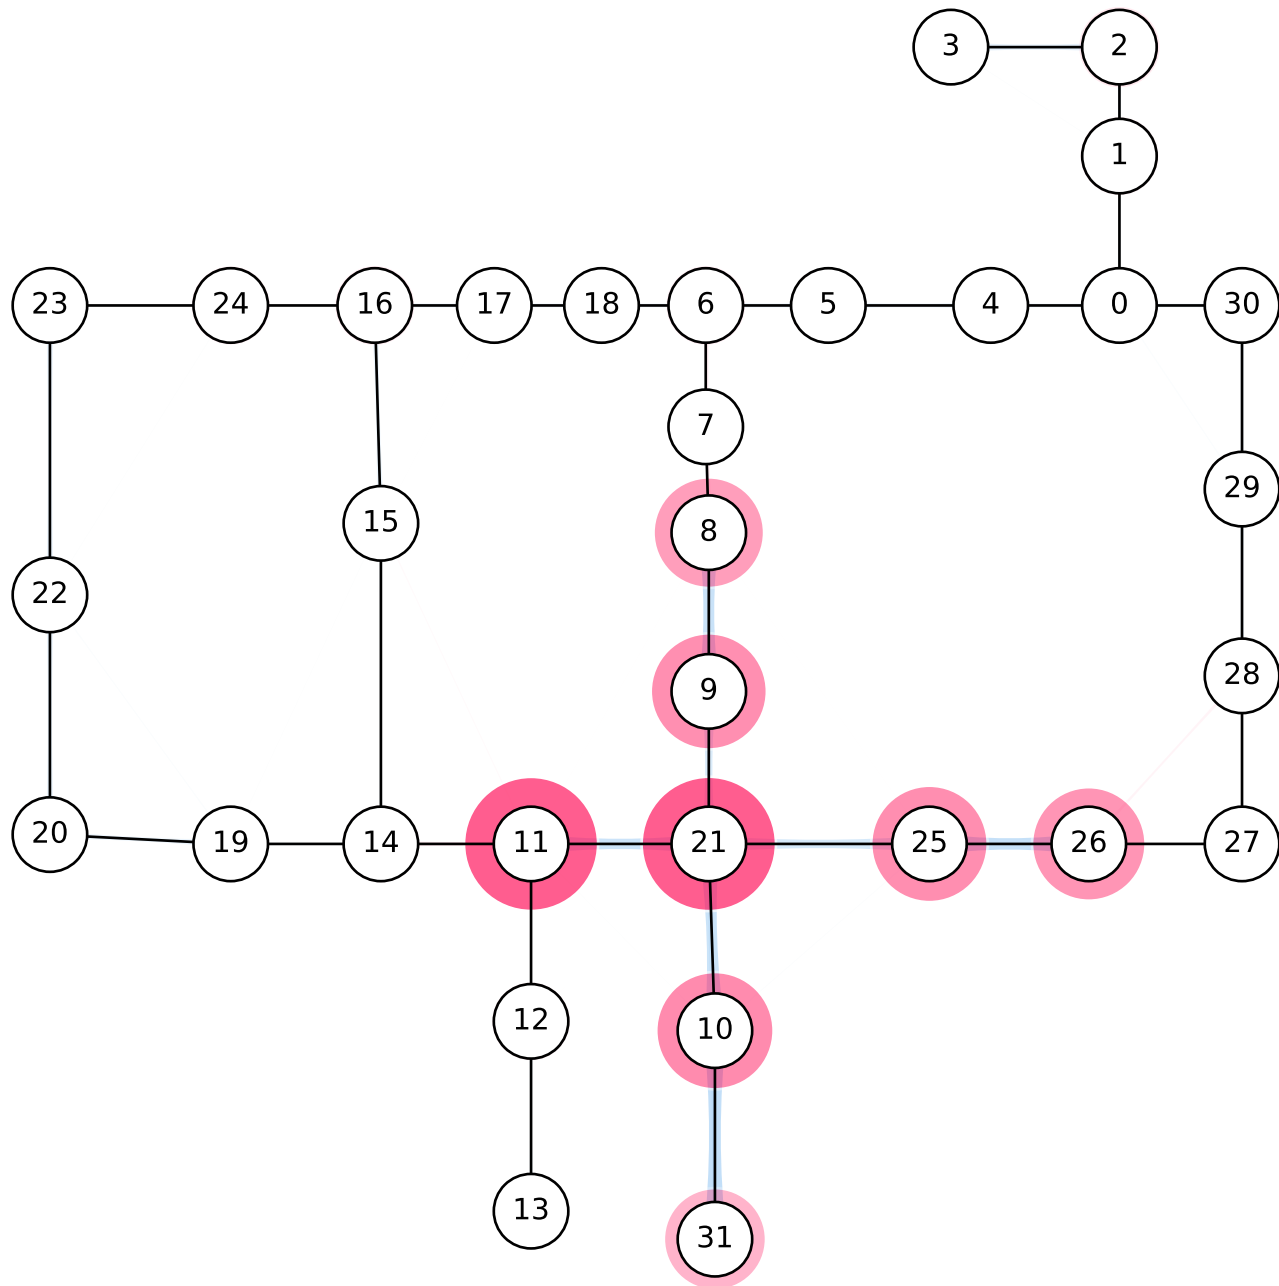

Supplement: supplementary_material [file attachment]

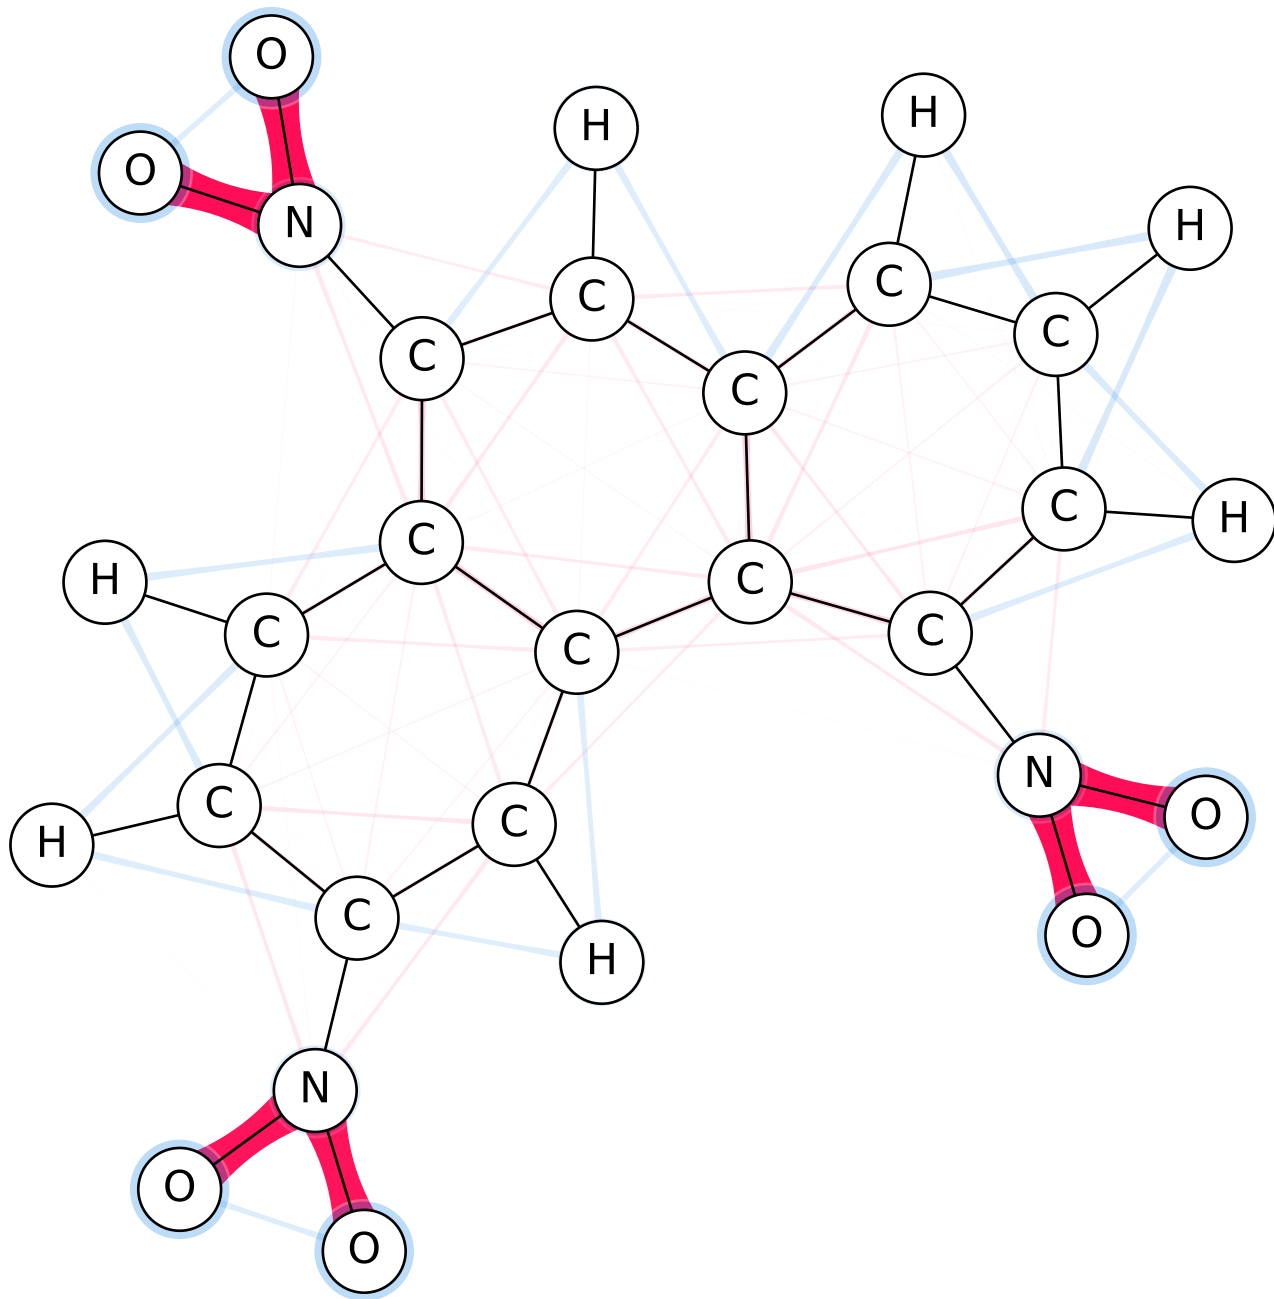

Supplement: supplementary_material [file attachment]

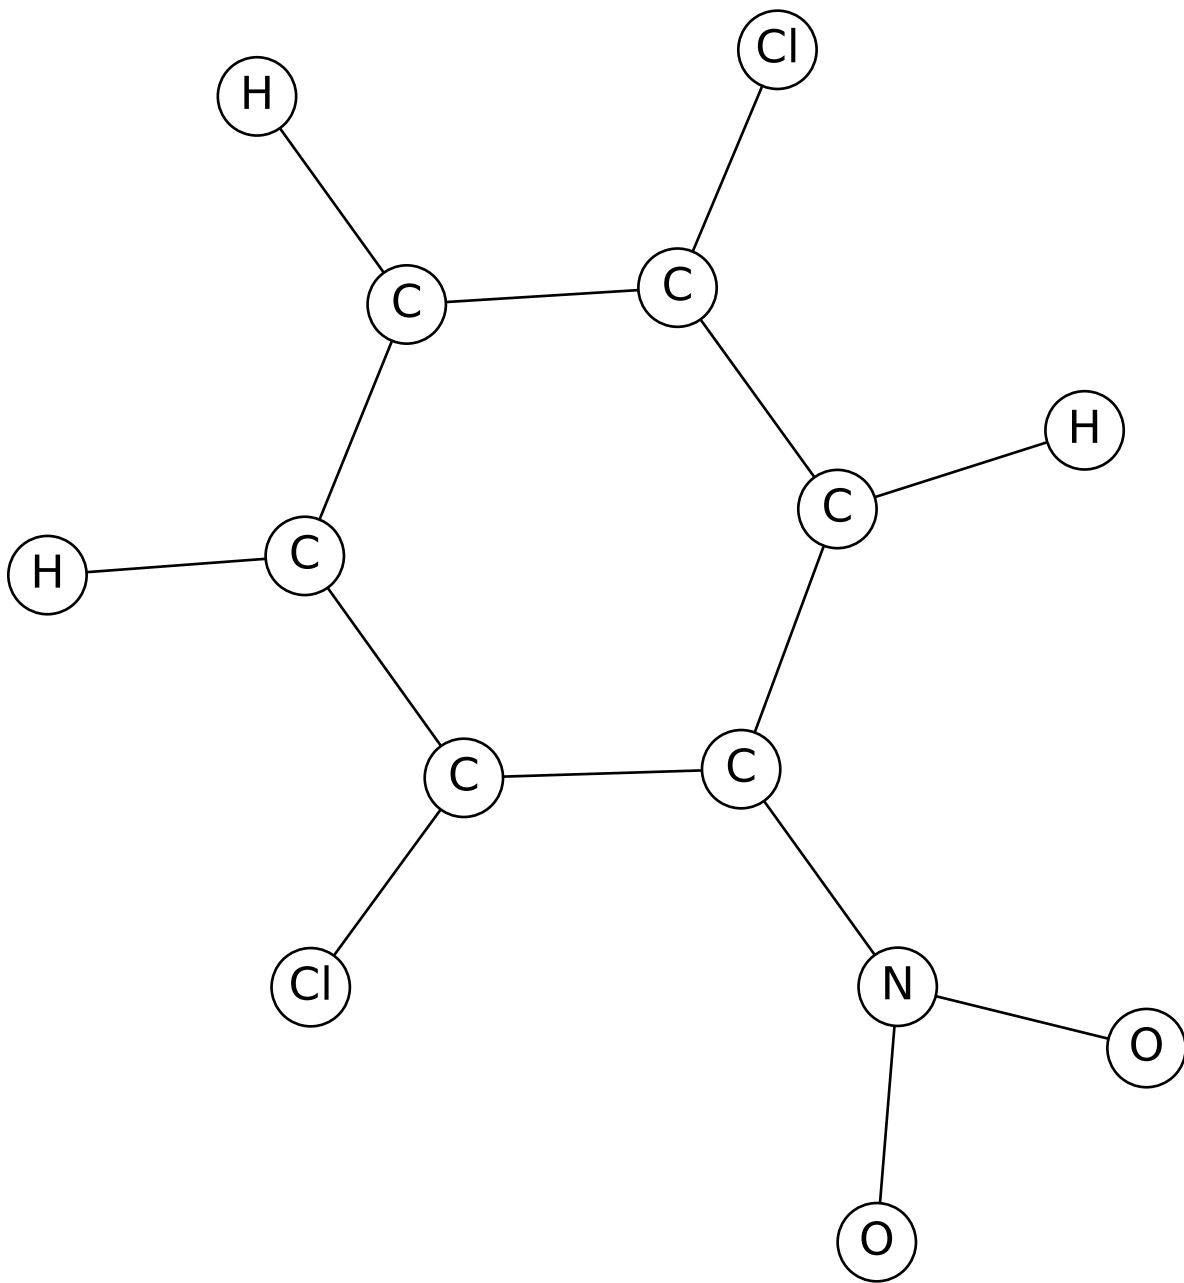

Supplement: supplementary_material [file attachment]

# SV for Mutagenicity with 2-layer GCN

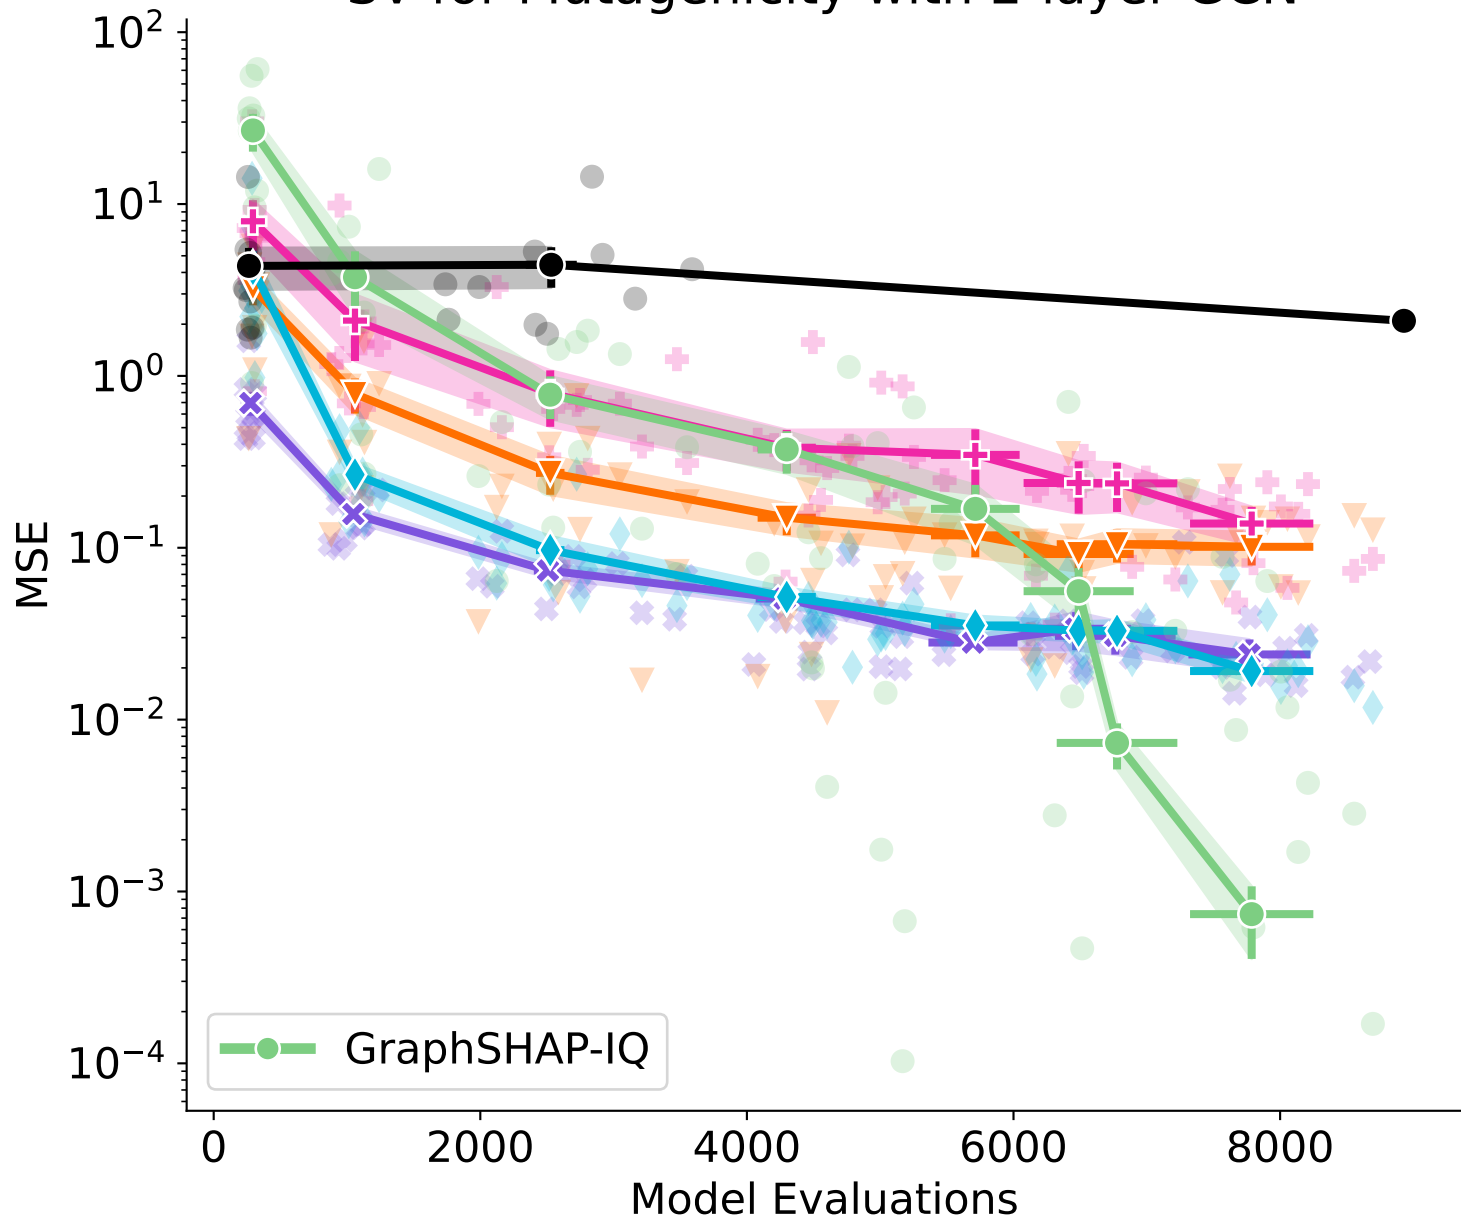

Supplement: supplementary_material [file attachment]

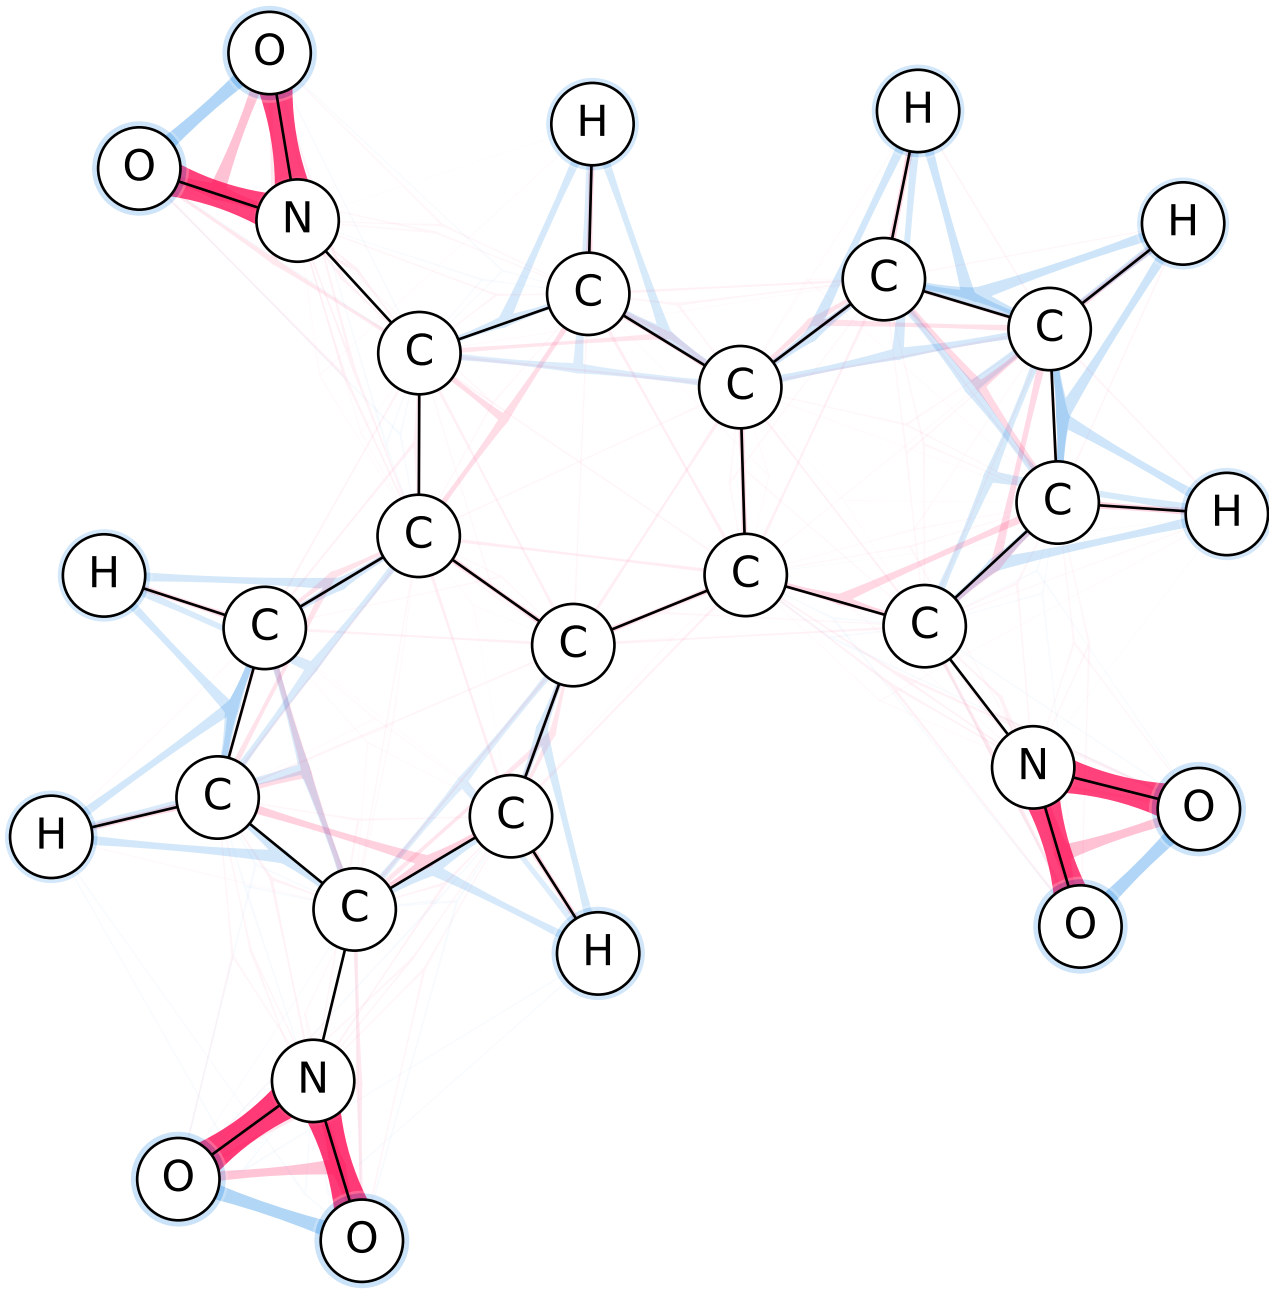

Supplement: supplementary_material [file attachment]

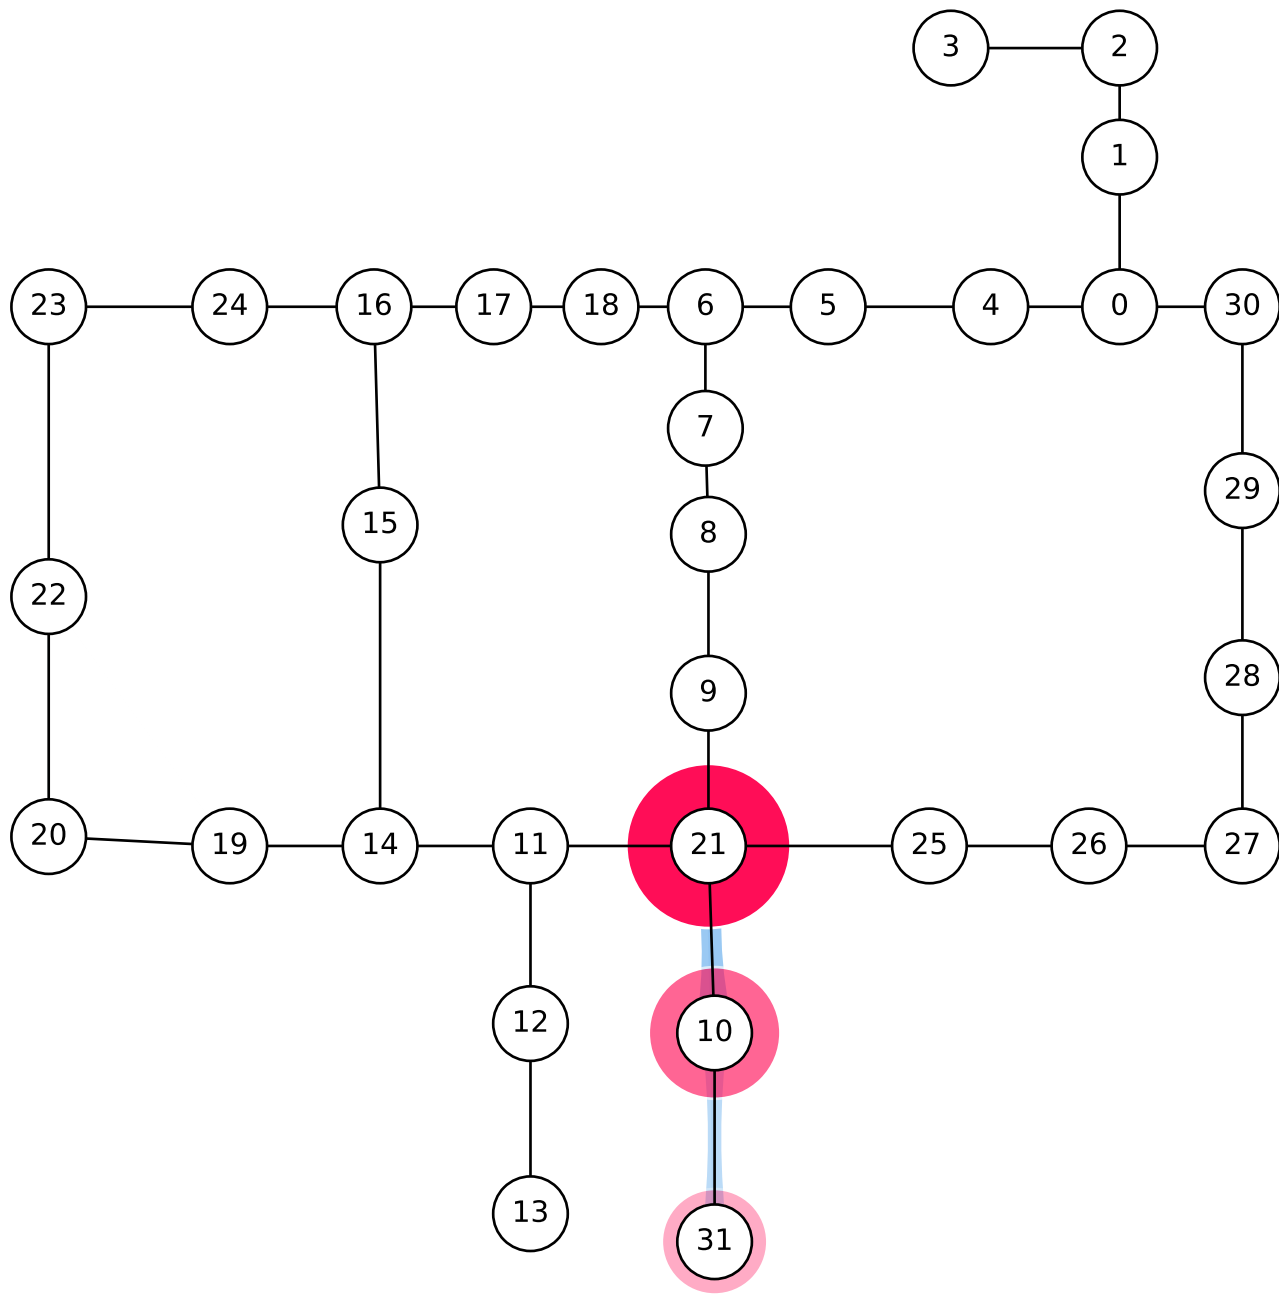

Supplement: supplementary_material [file attachment]

## 2-SII for BZR with 2-layer GAT

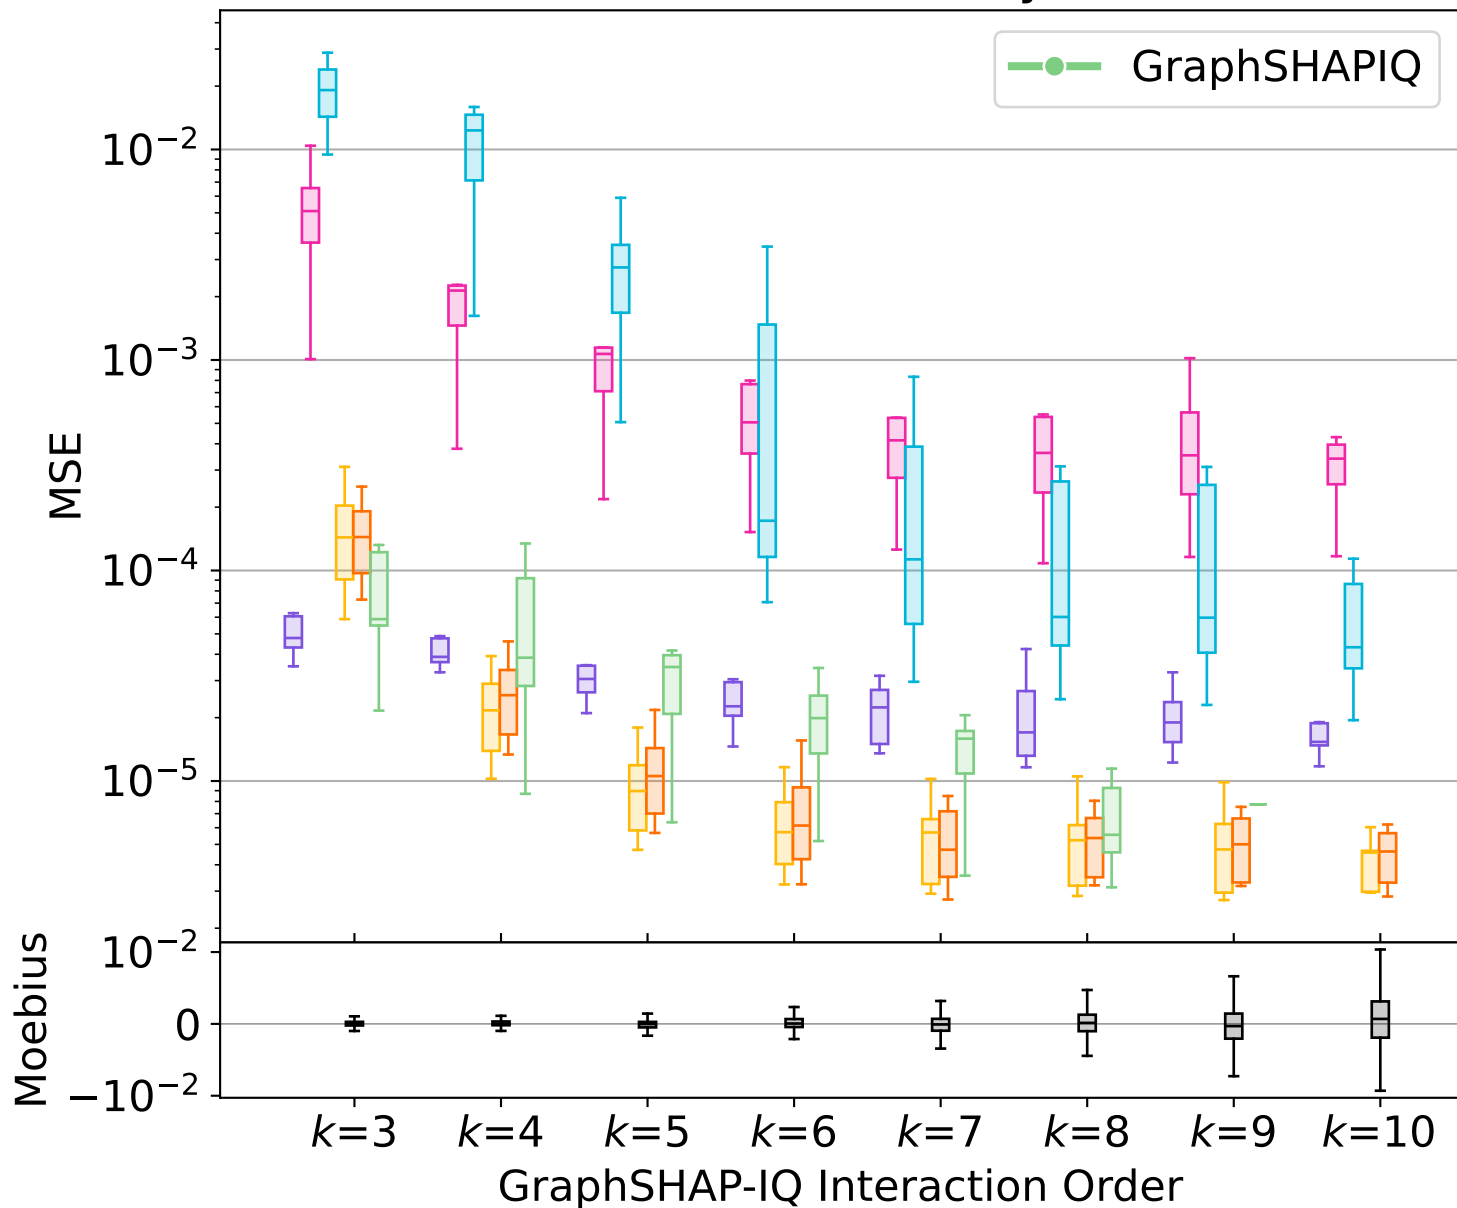

Supplement: supplementary_material [file attachment]

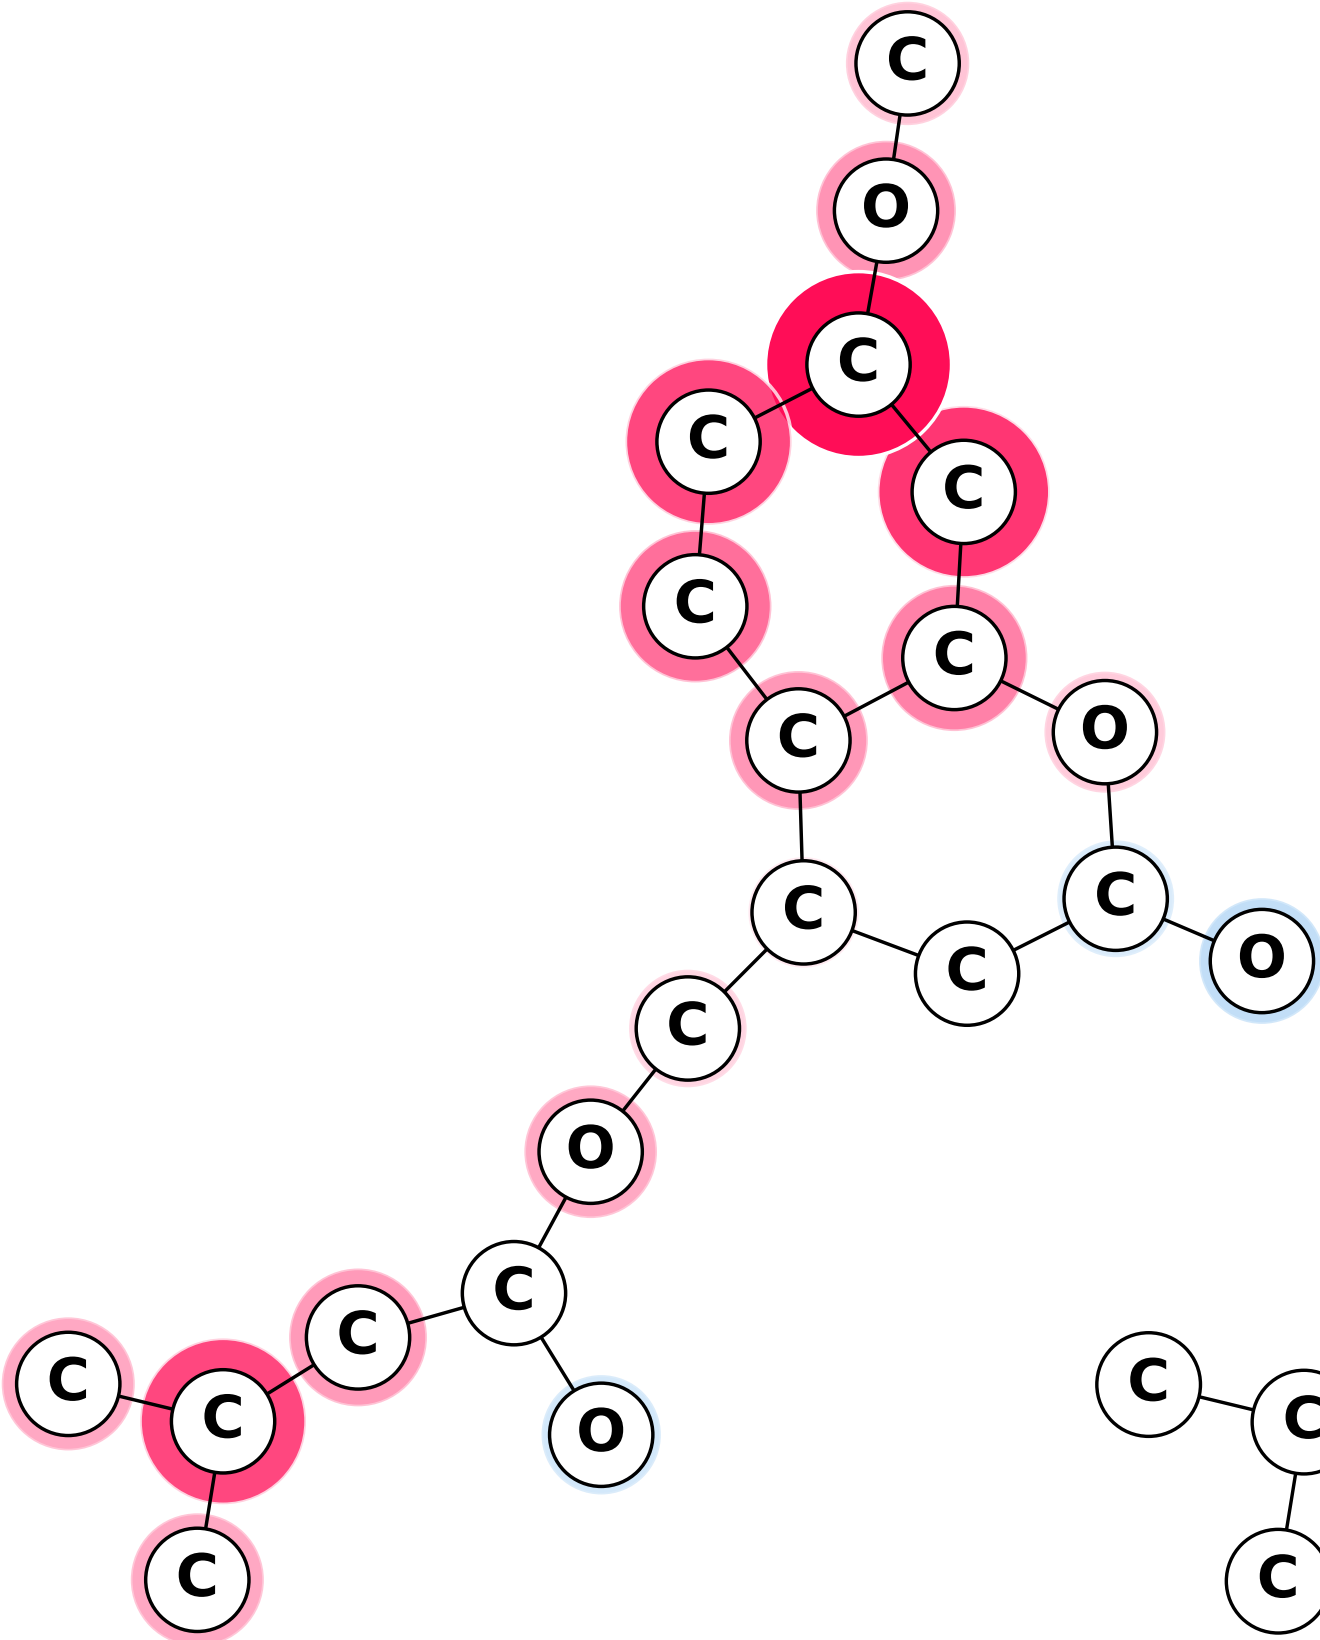

SV

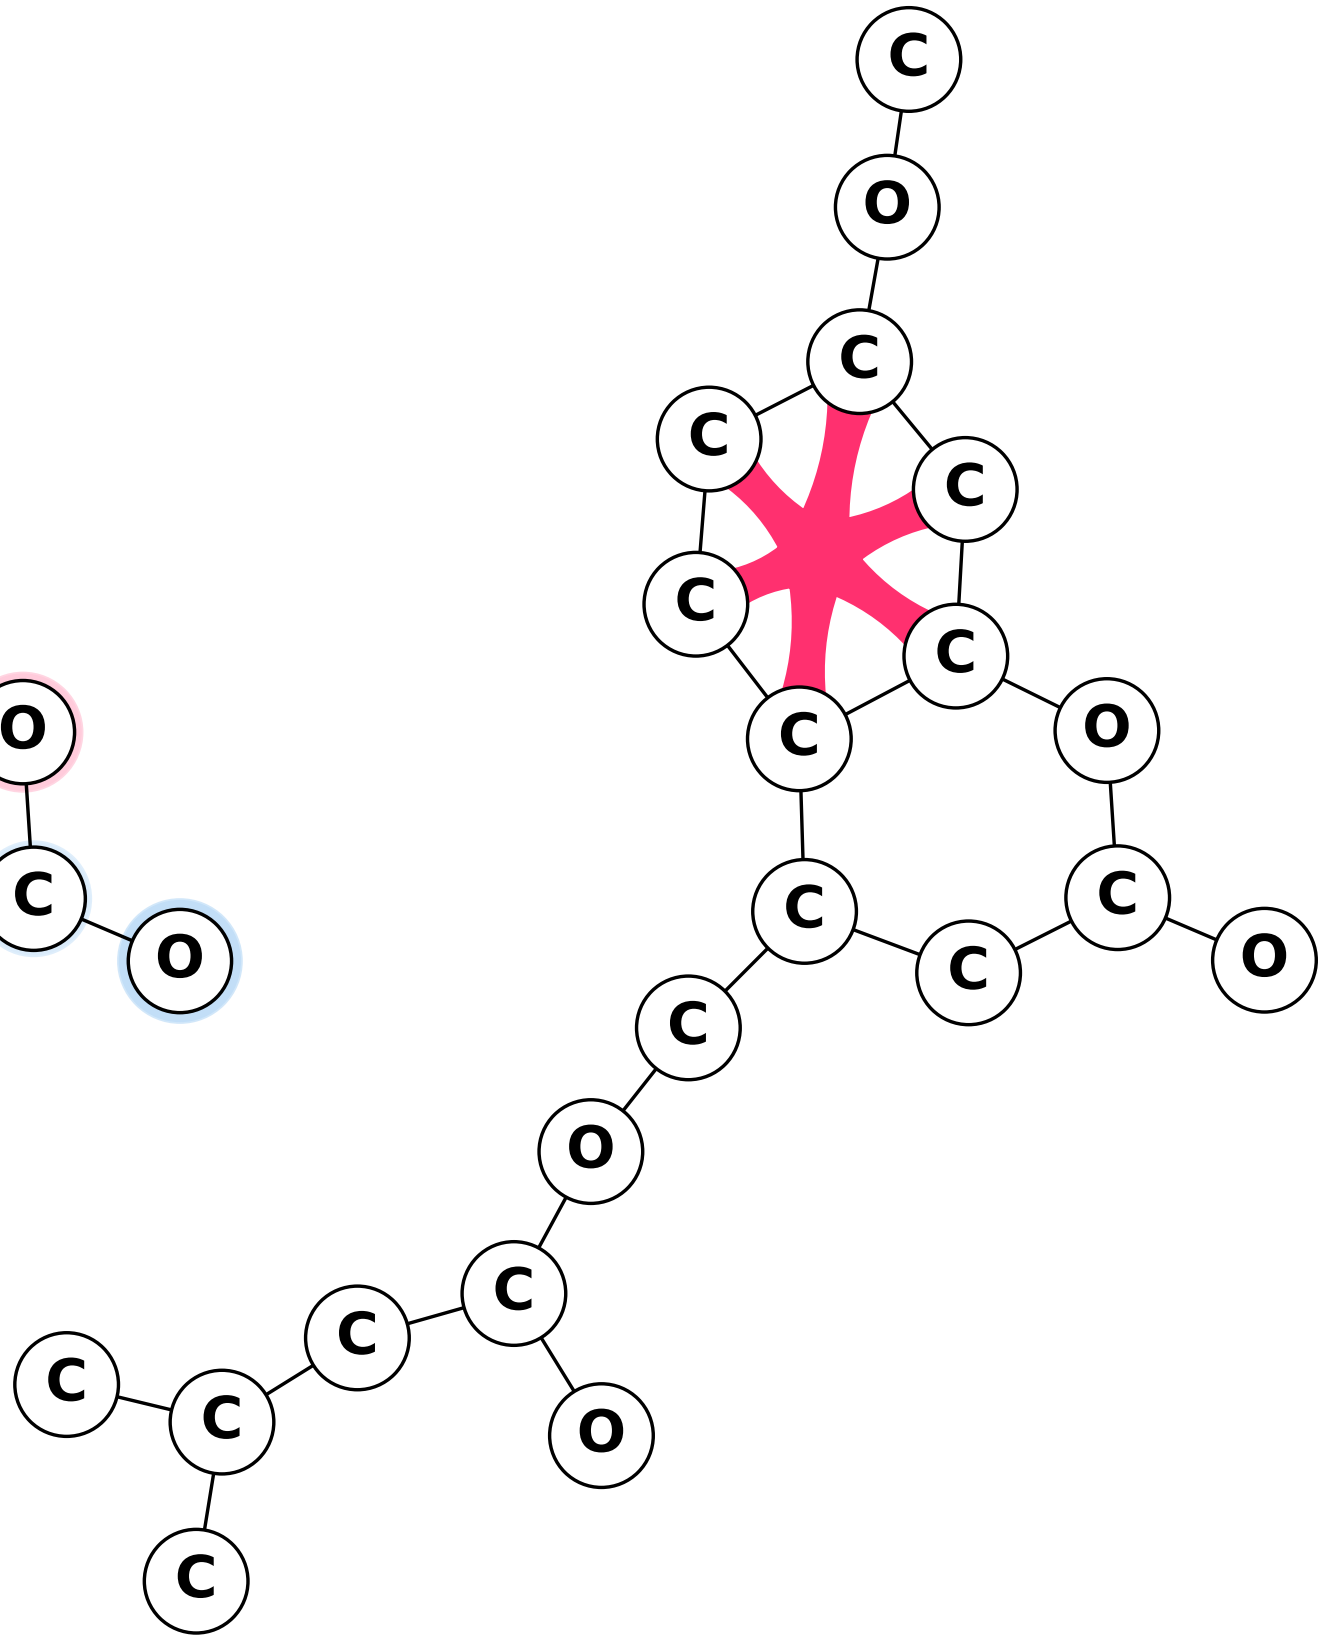

MI

Supplement: supplementary_material [file attachment]

# SV for Mutagenicity with 2-layer GIN

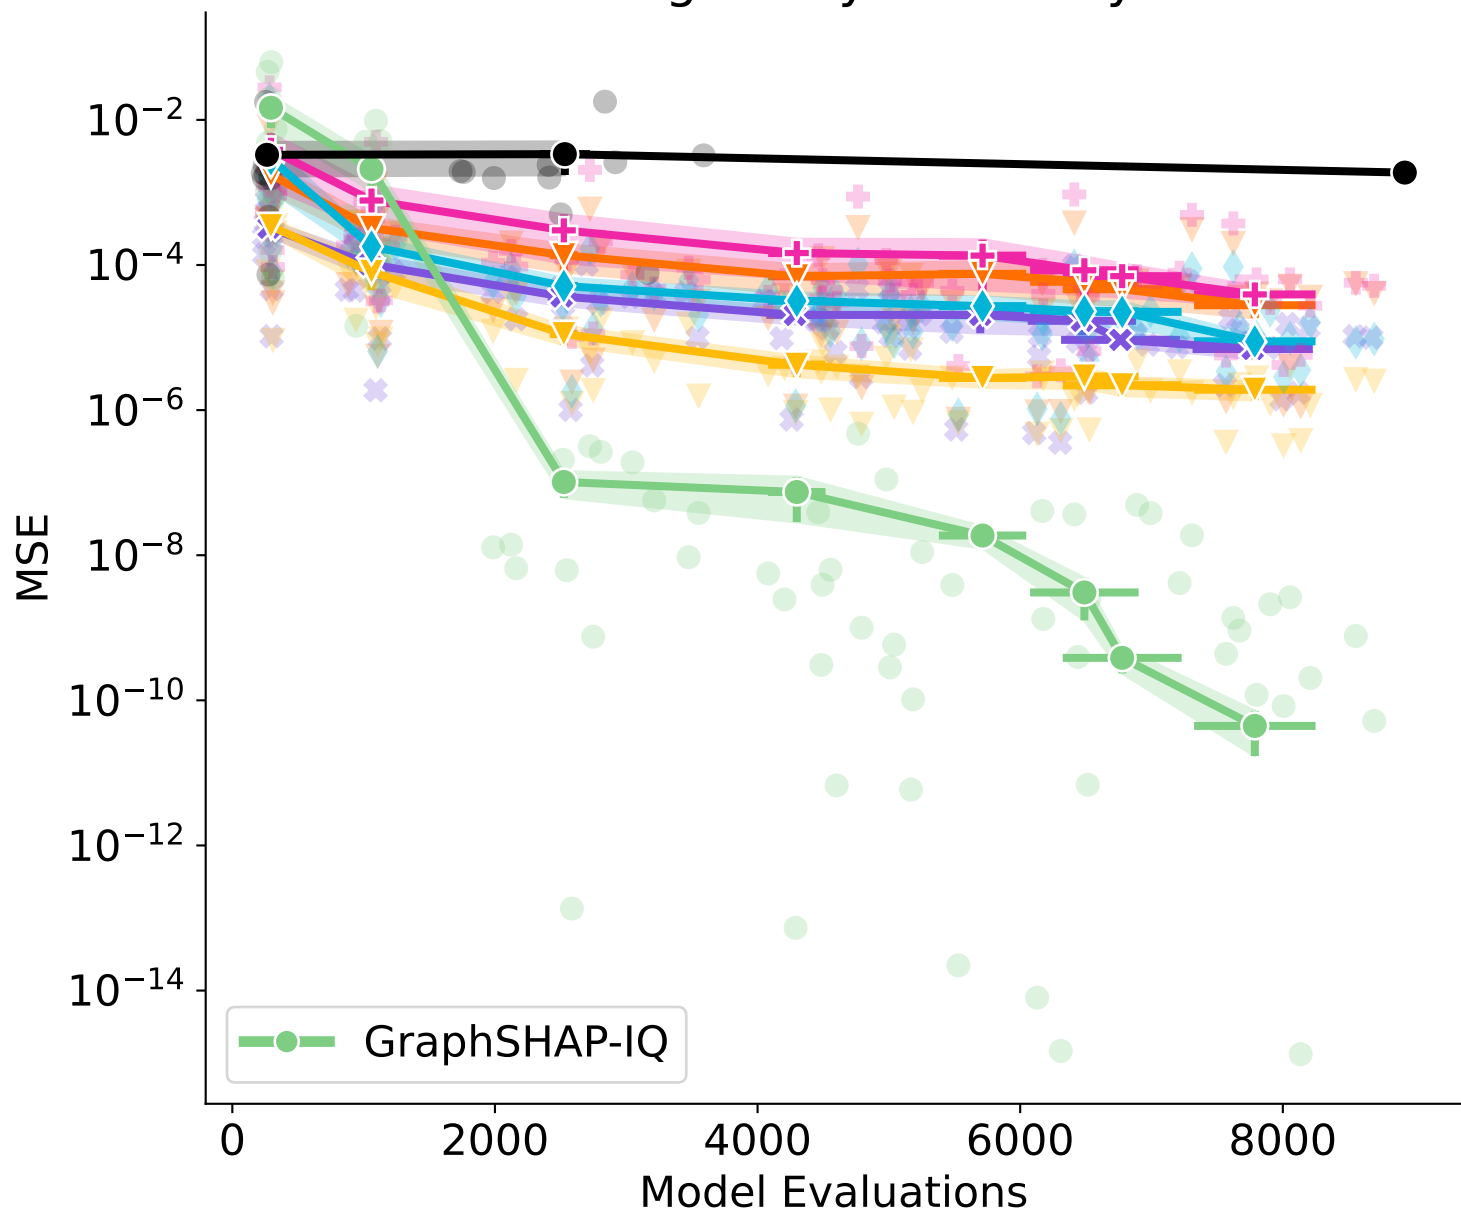

Supplement: supplementary_material [file attachment]

# SV for PROTEINS with 2-layer GAT

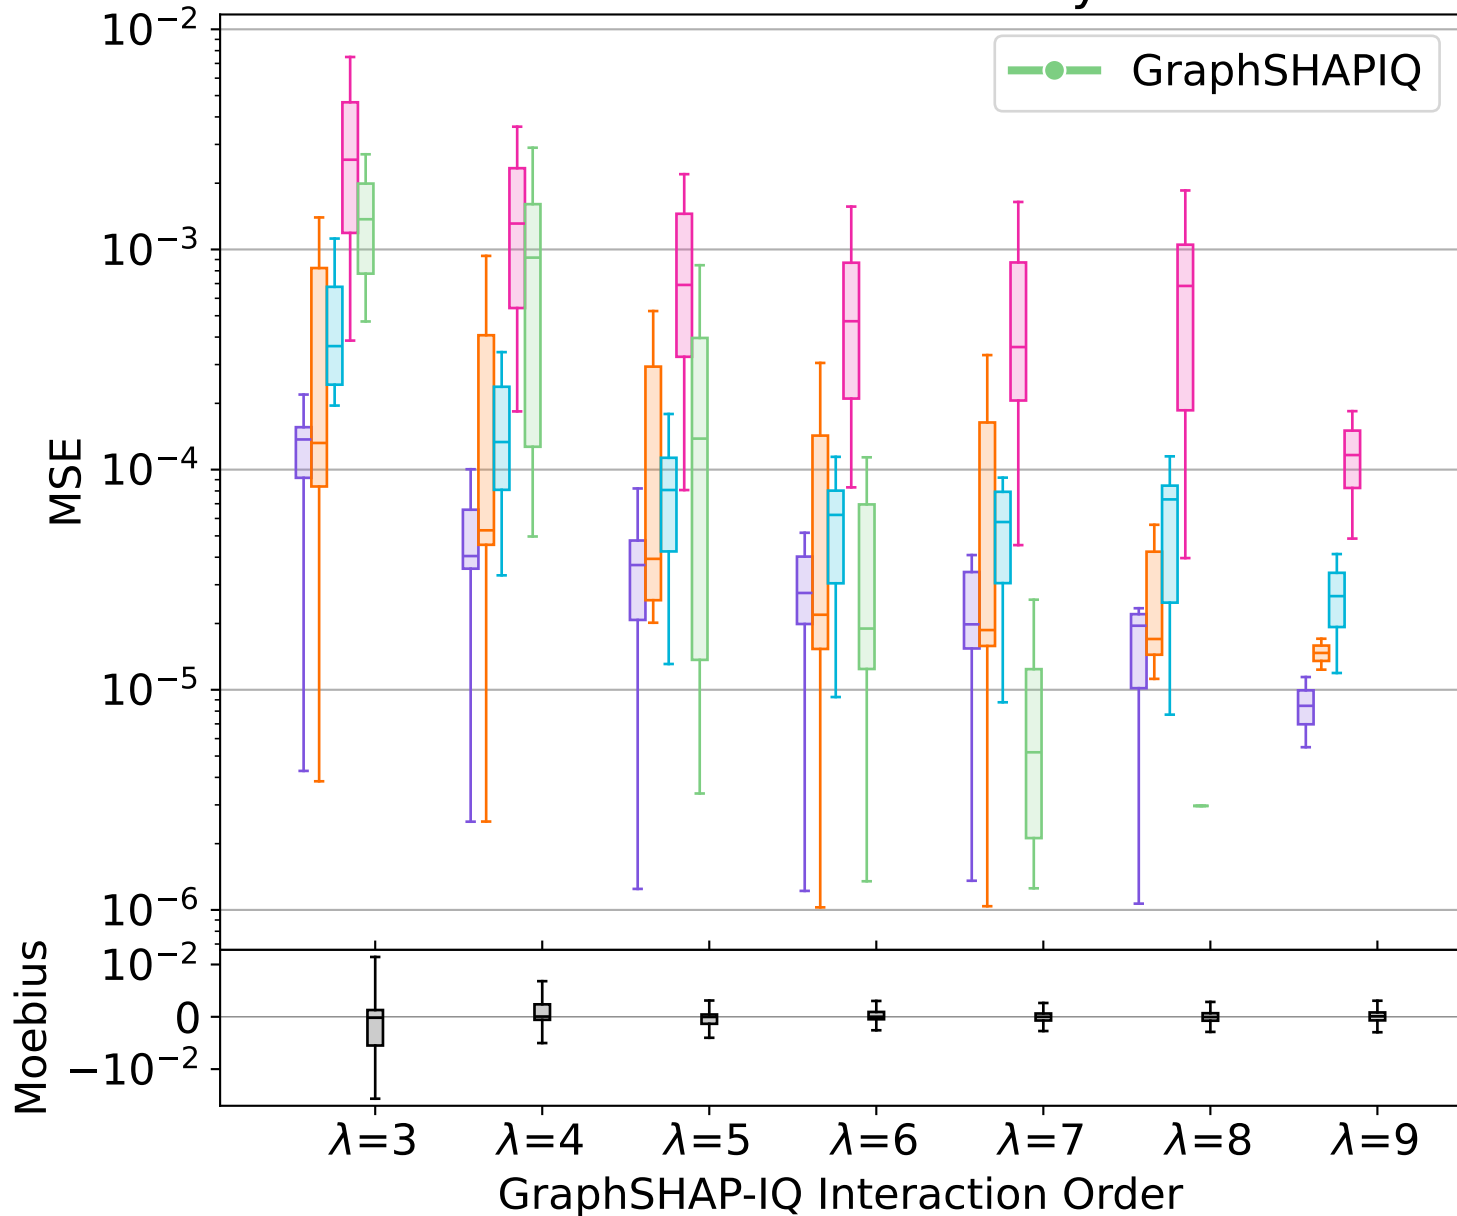

Supplement: supplementary_material [file attachment]

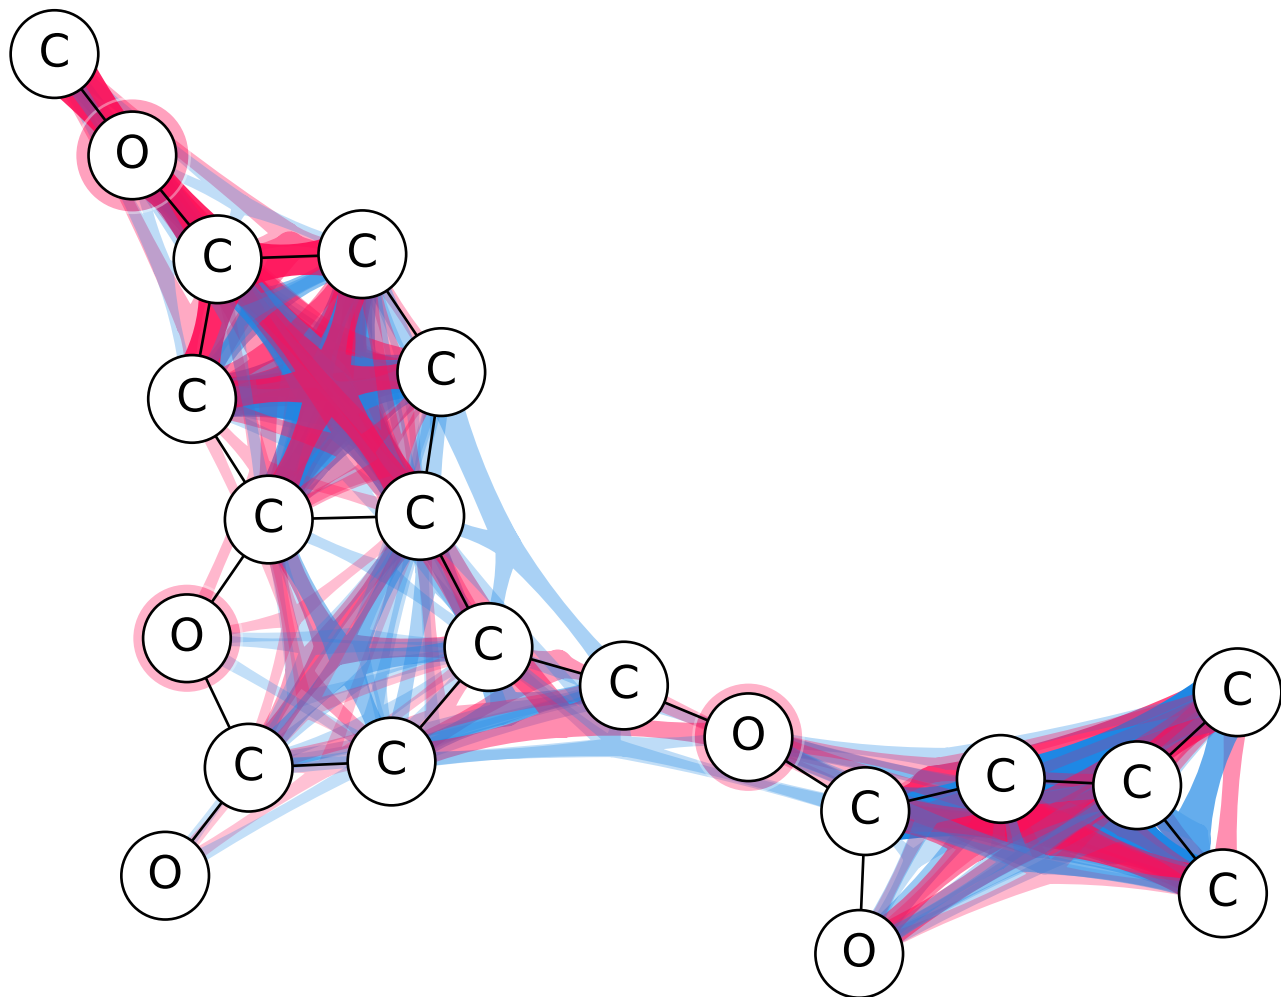

Supplement: supplementary_material [file attachment]

## Baselines

**SV**  KernelSHAP  k-add. KernelSHAP  Permutation Sampling  Unbiased KernelSHAP  SVARM

Supplement: supplementary_material [file attachment]

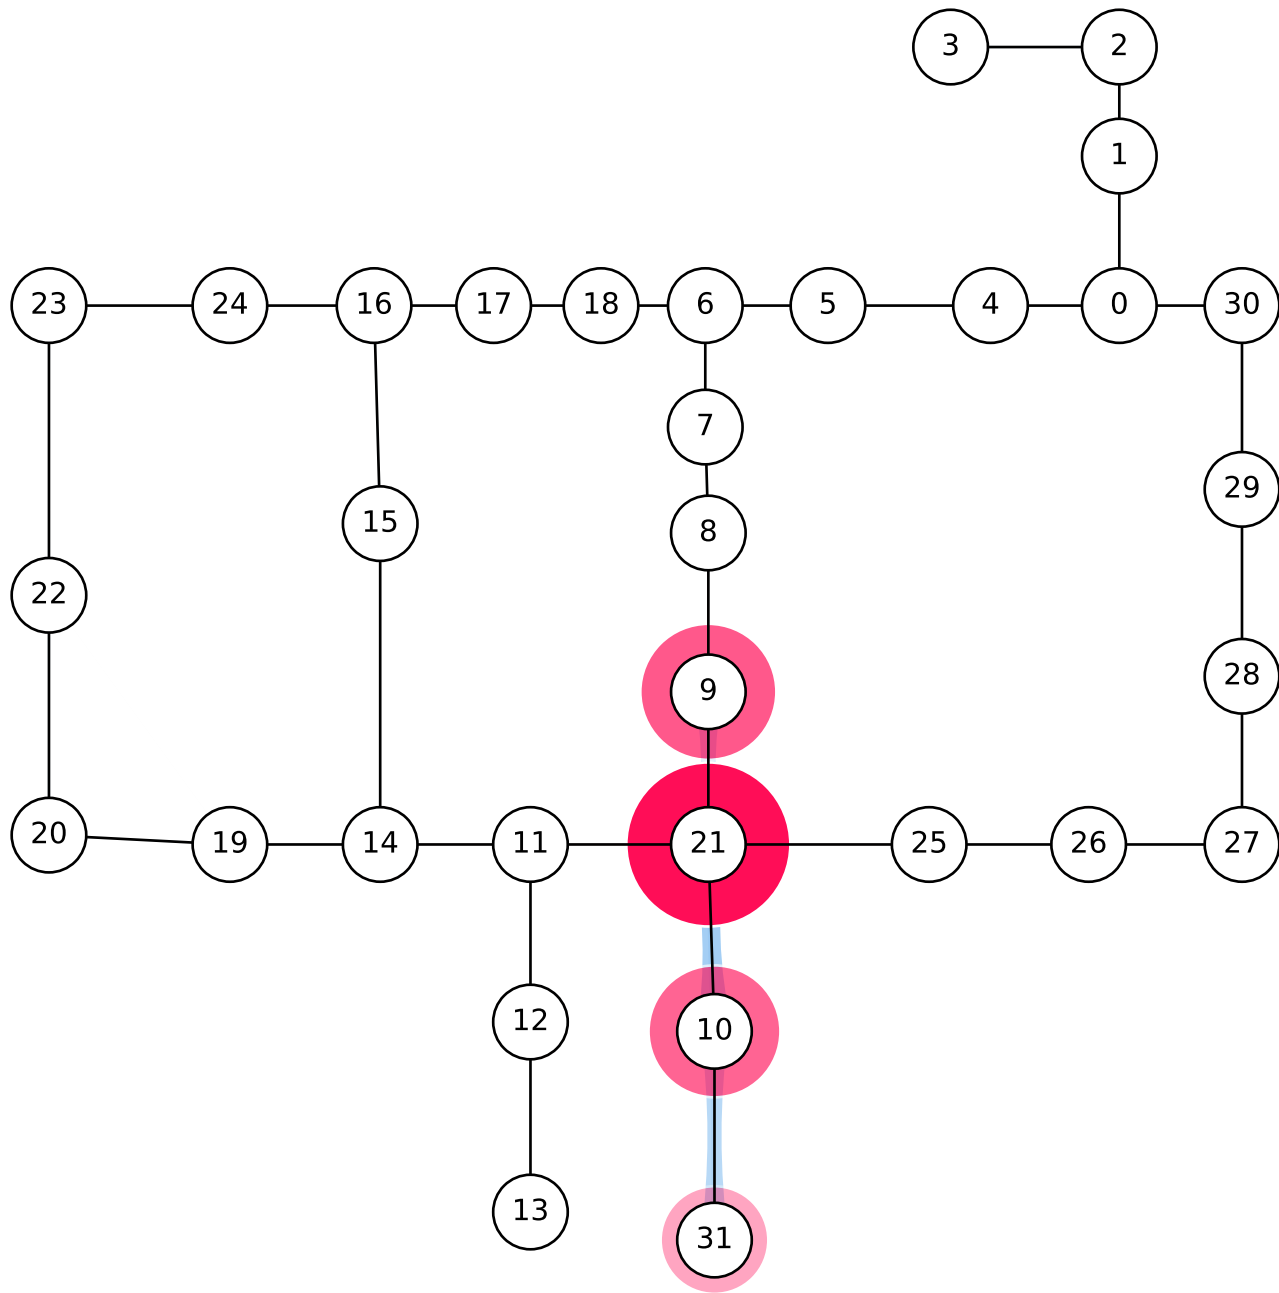

Supplement: supplementary_material [file attachment]

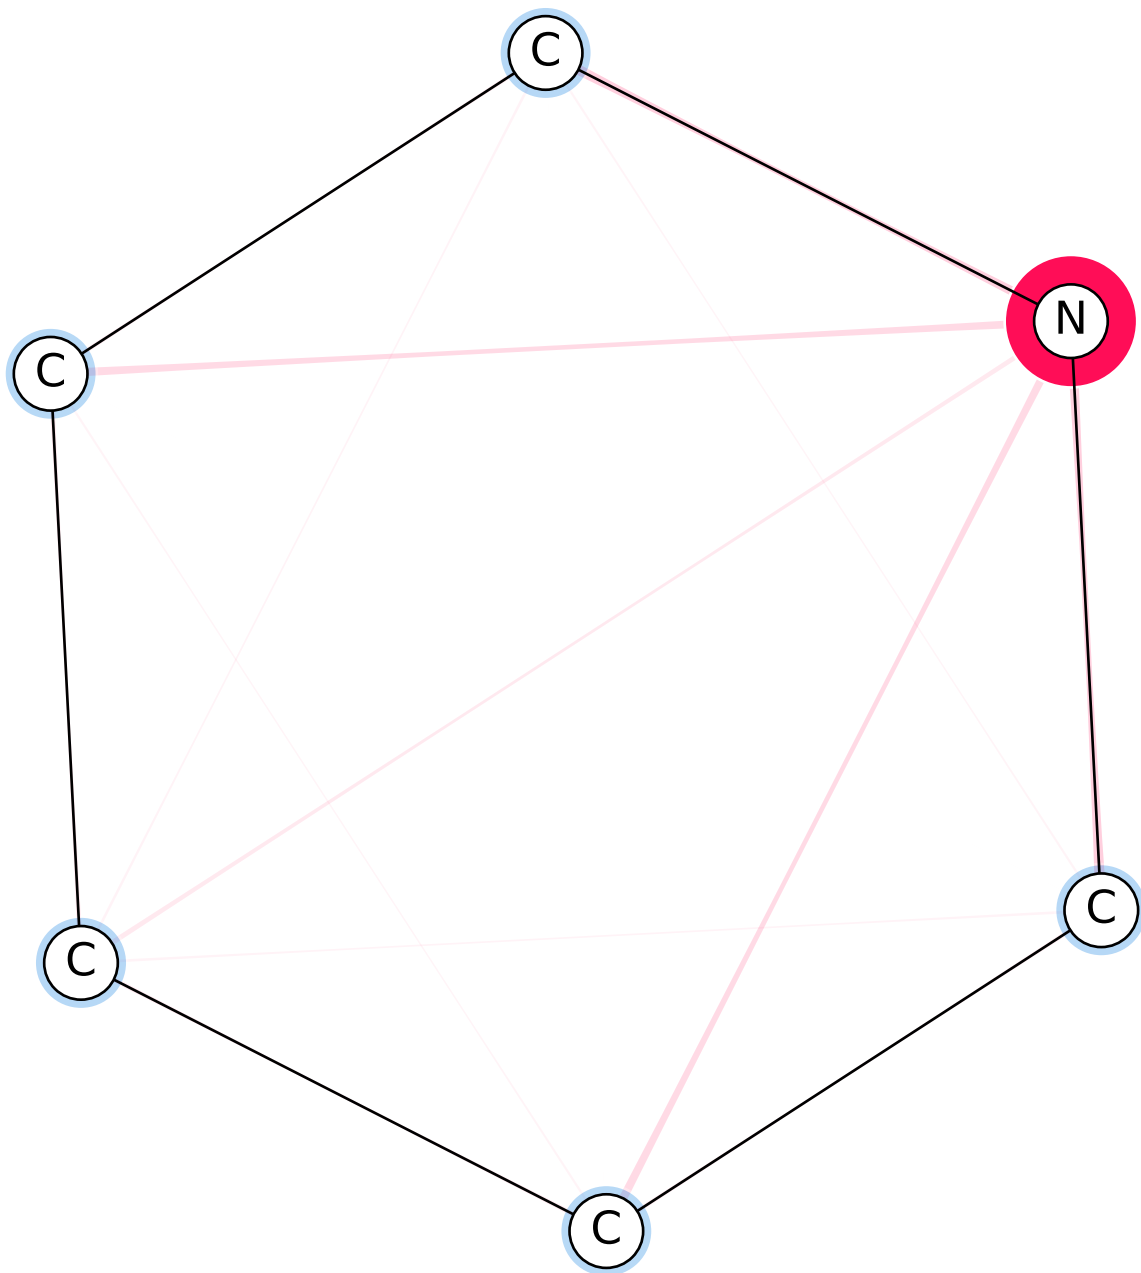

Supplement: supplementary_material [file attachment]

# SV for BZR with 2-layer GCN

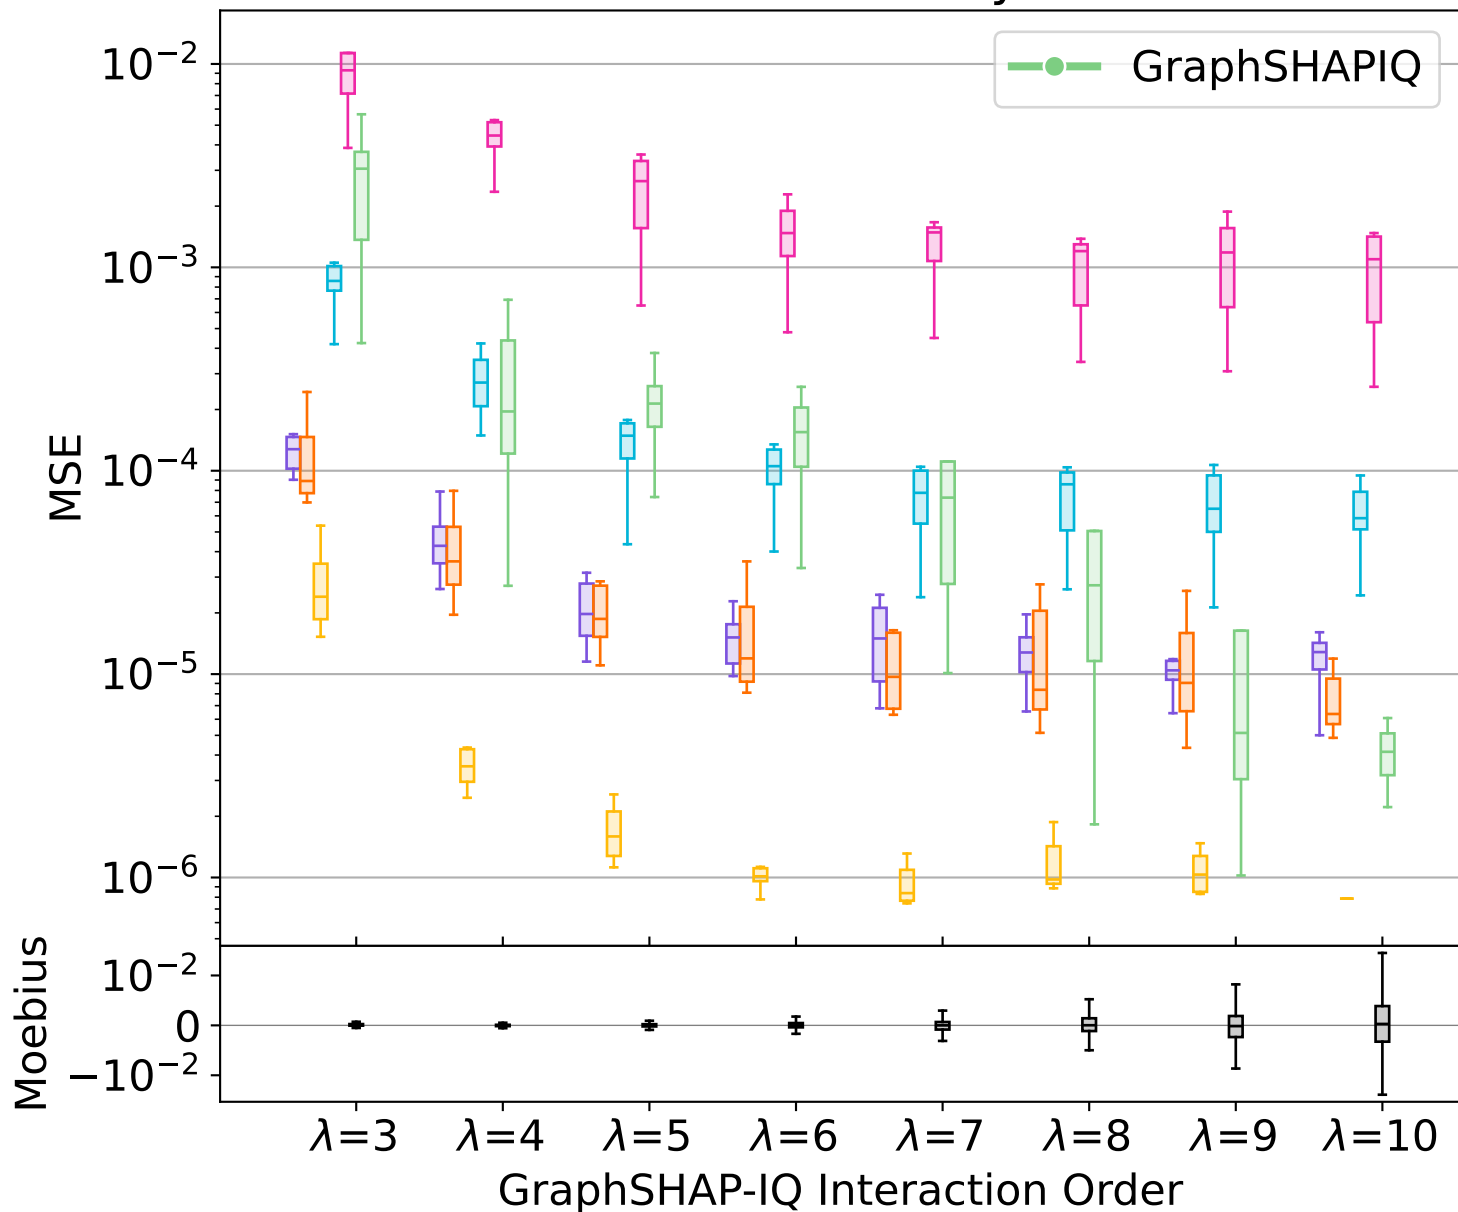

Supplement: supplementary_material [file attachment]

# Mutagenicity with 2-layer GCN

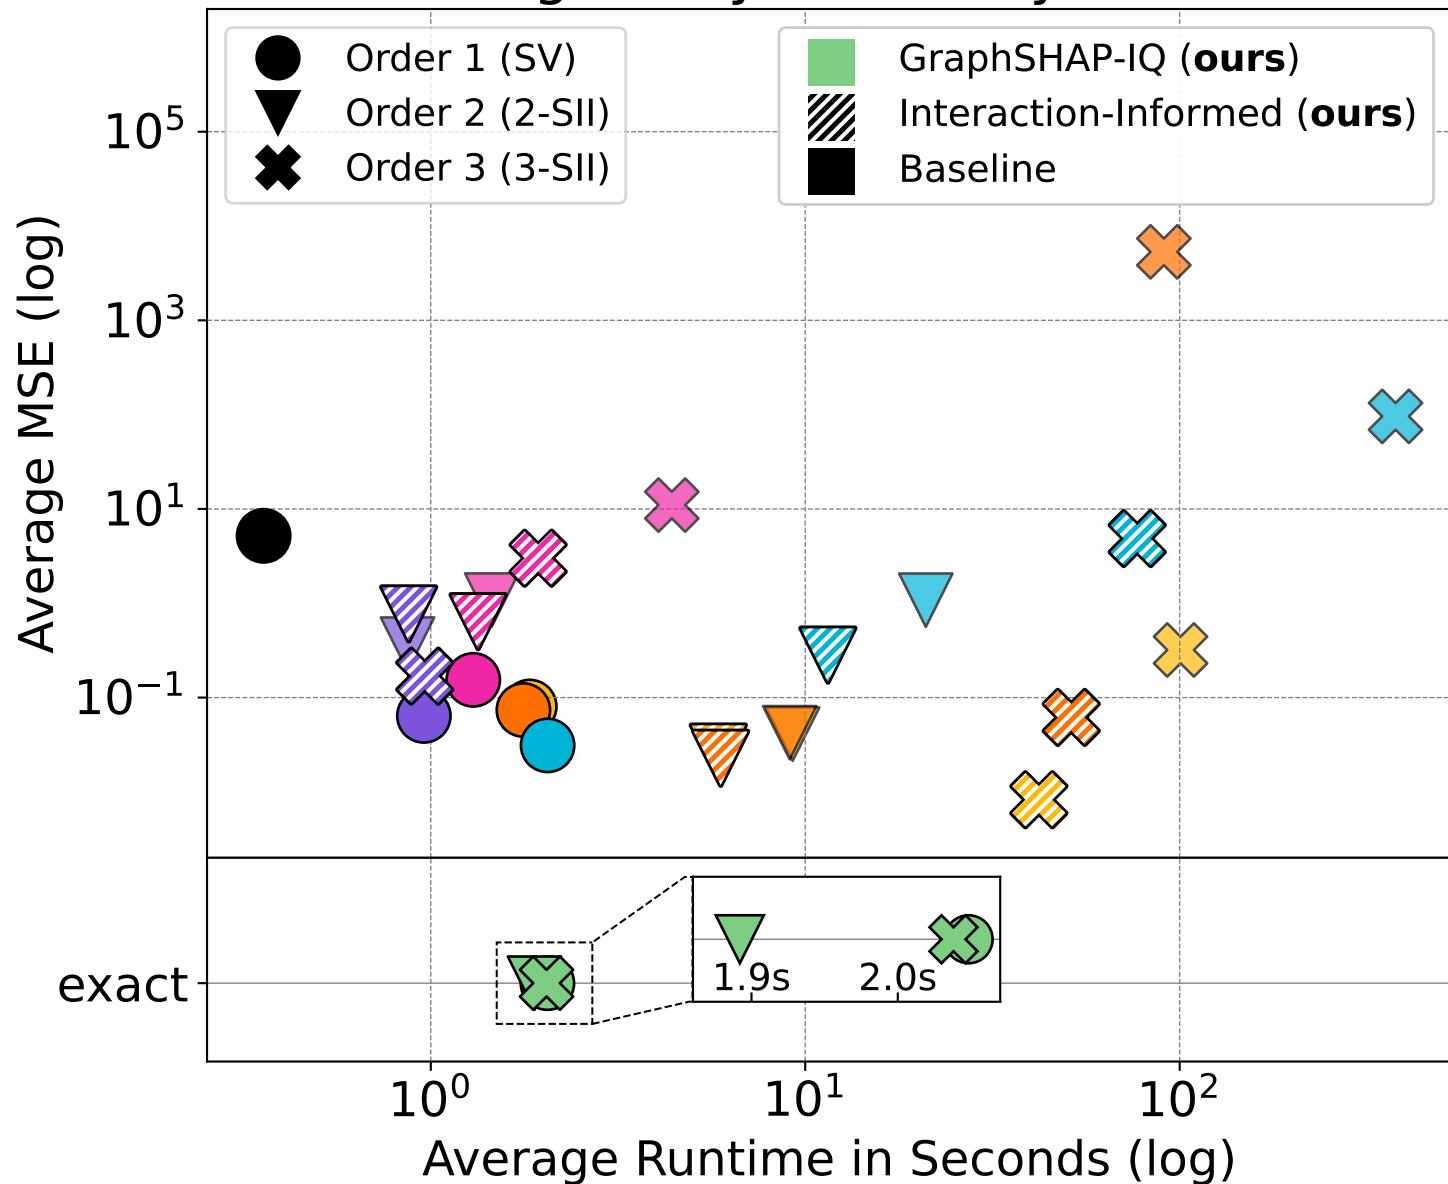

Supplement: supplementary_material [file attachment]

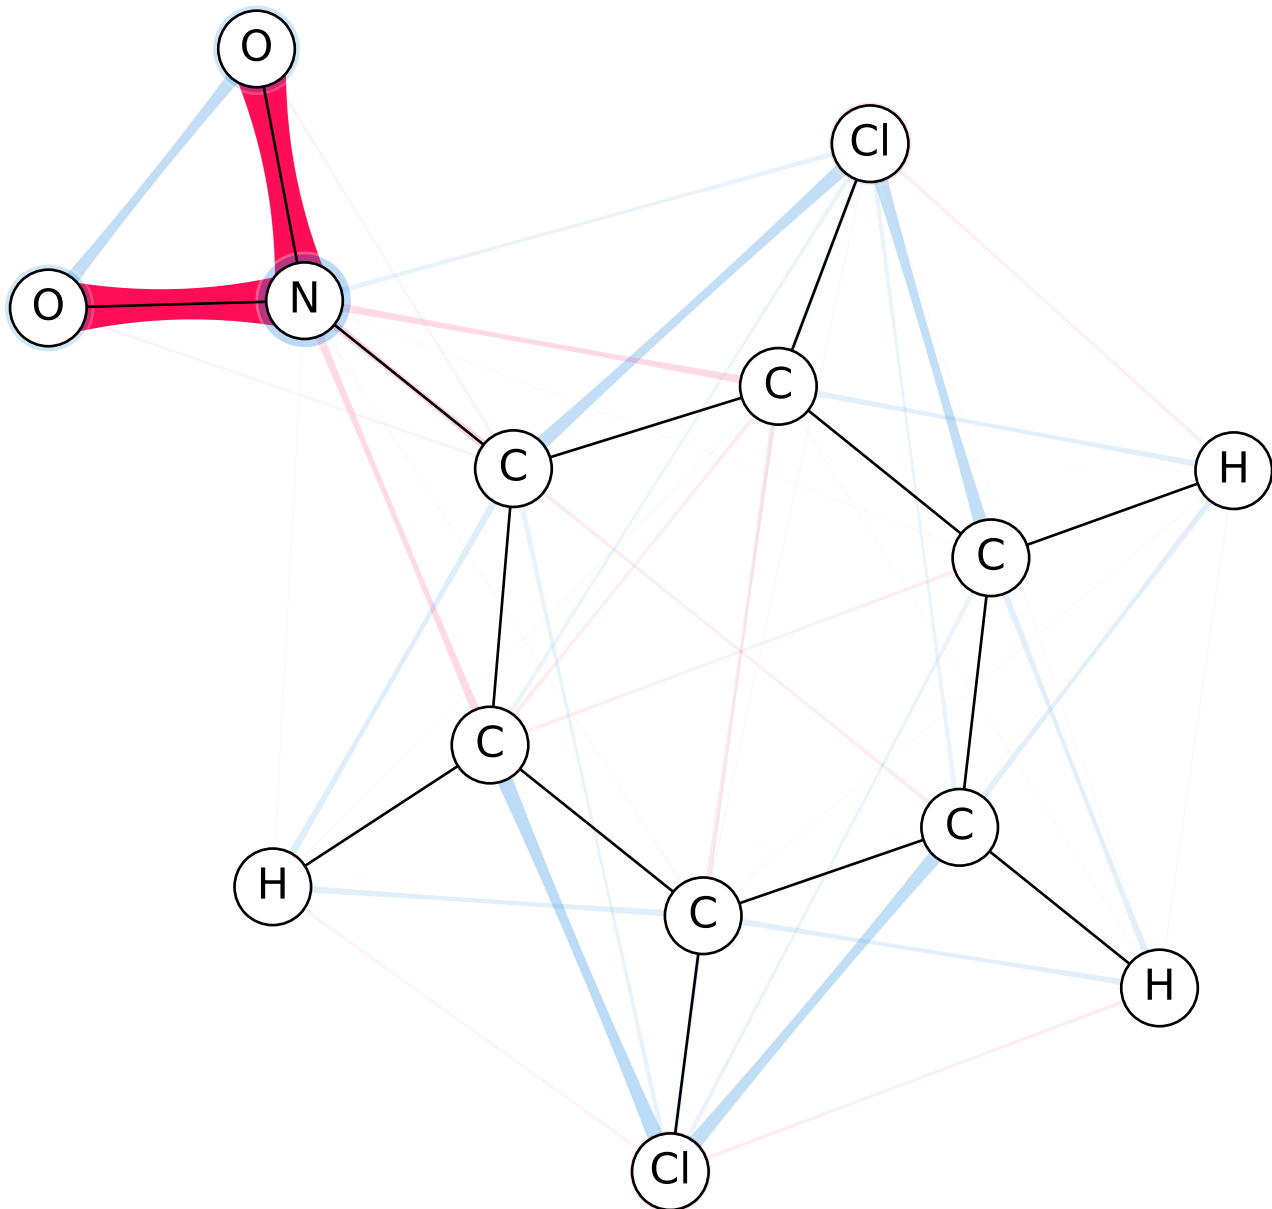

Supplement: supplementary_material [file attachment]

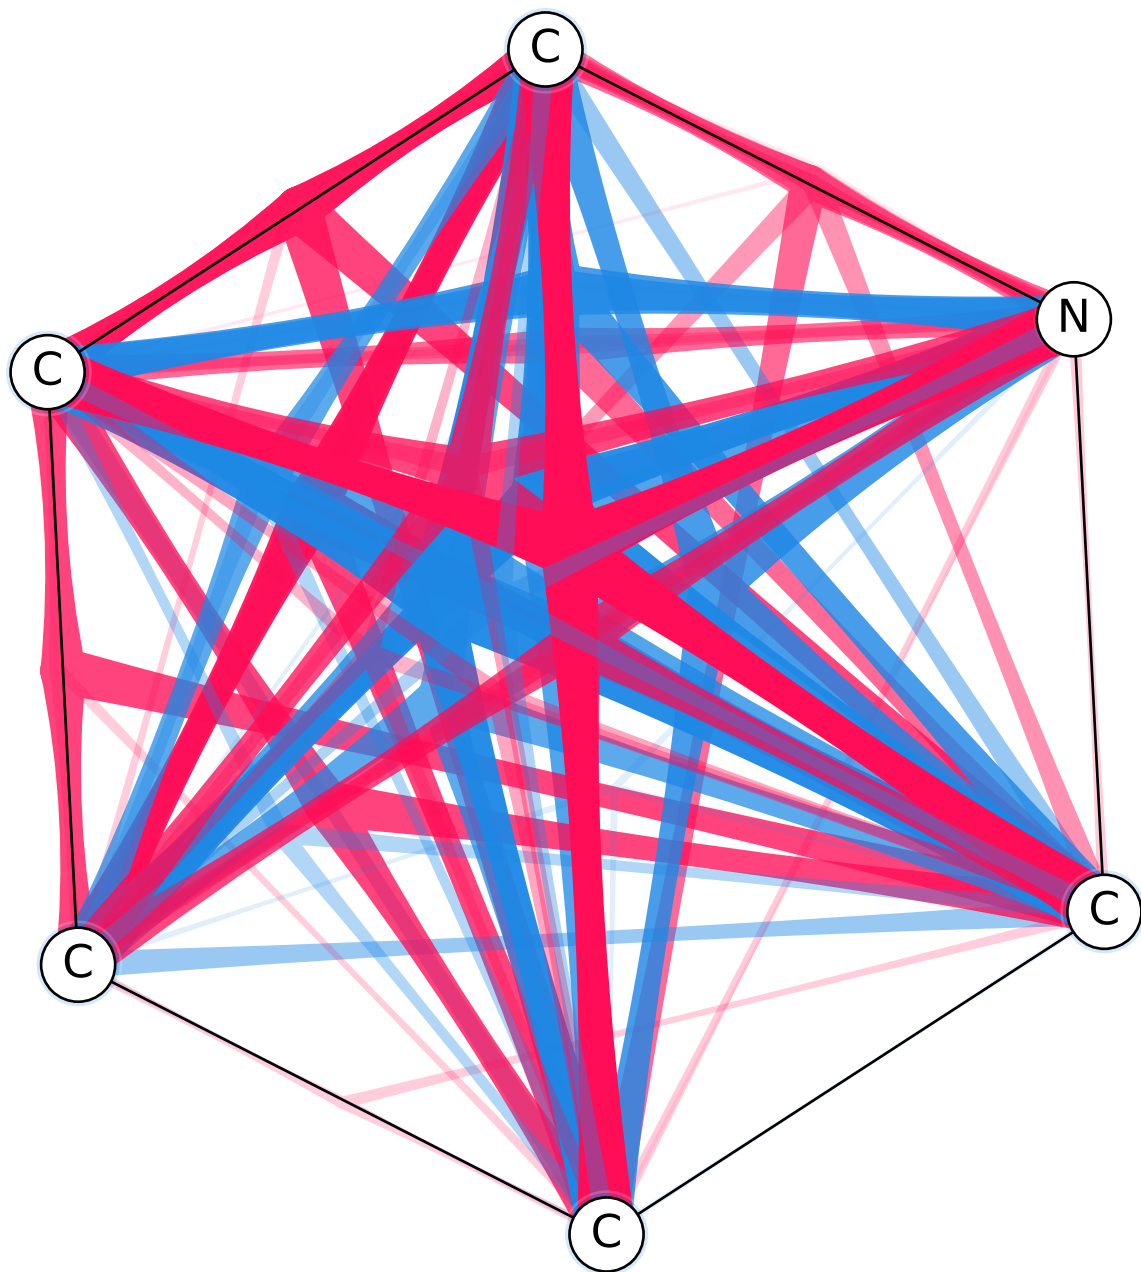

Supplement: supplementary_material [file attachment]

# 2-SII for Mutagenicity with 2-layer GAT

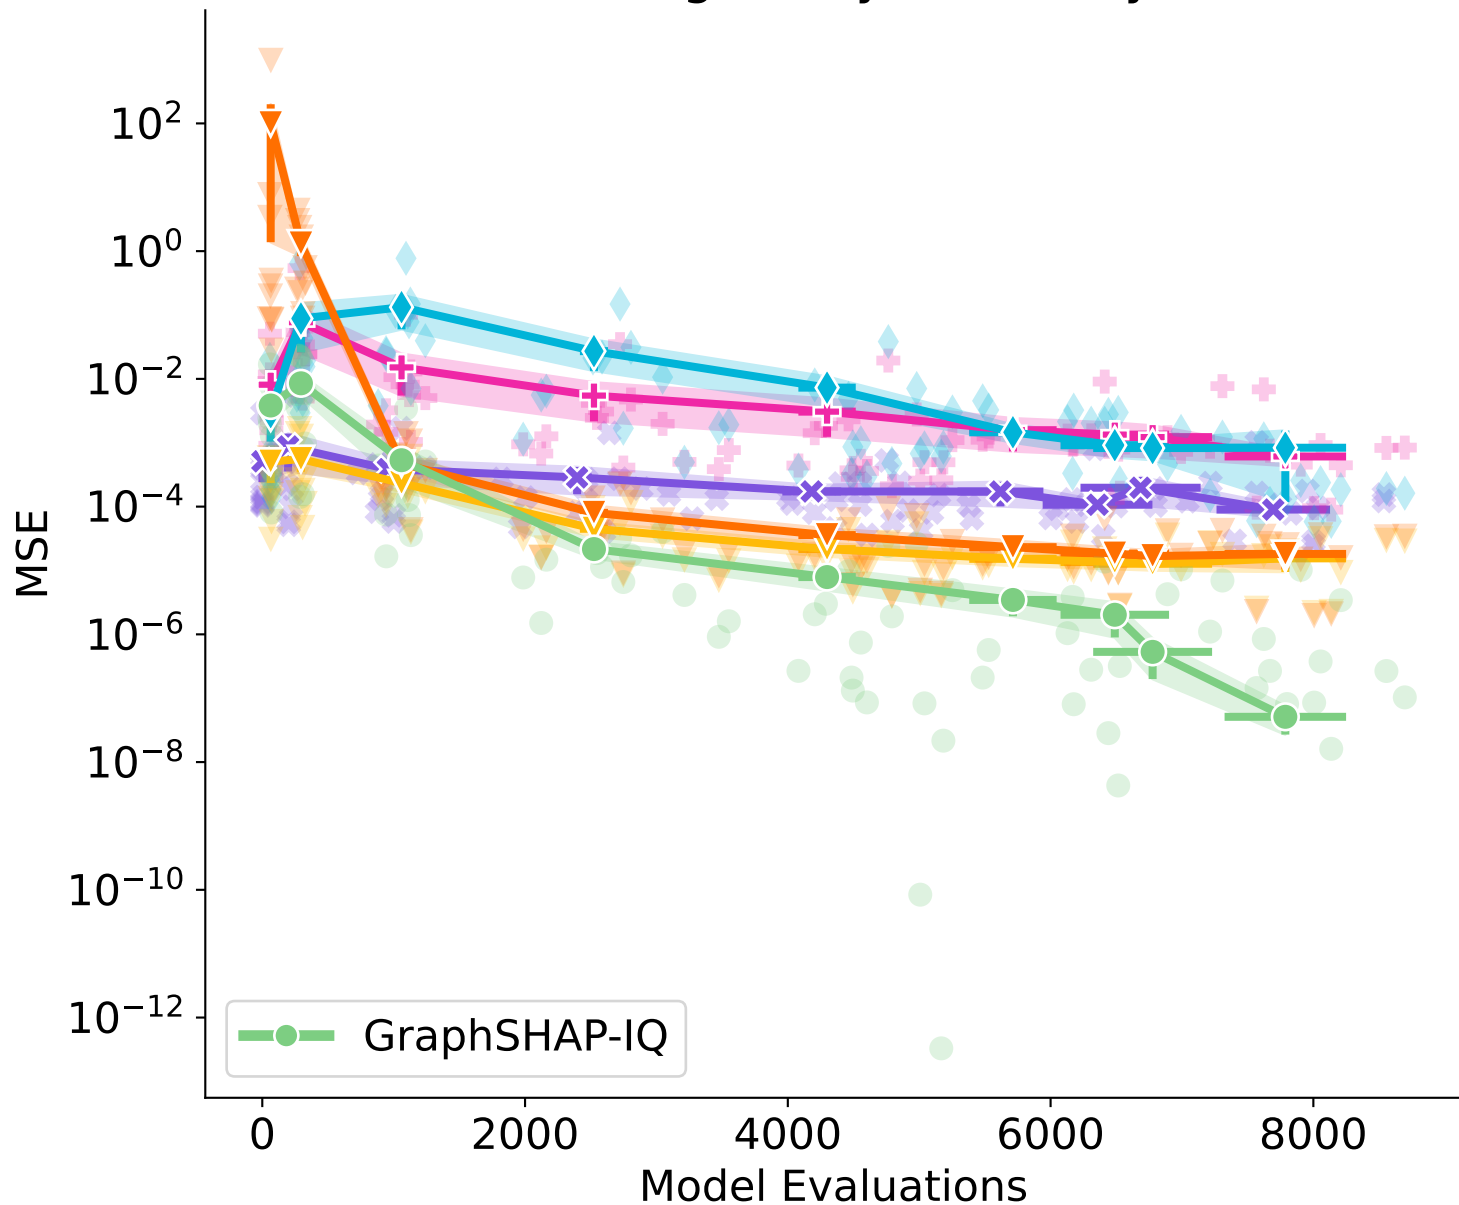

Supplement: supplementary_material [file attachment]

## 2-SII for Mutagenicity with 2-layer GCN

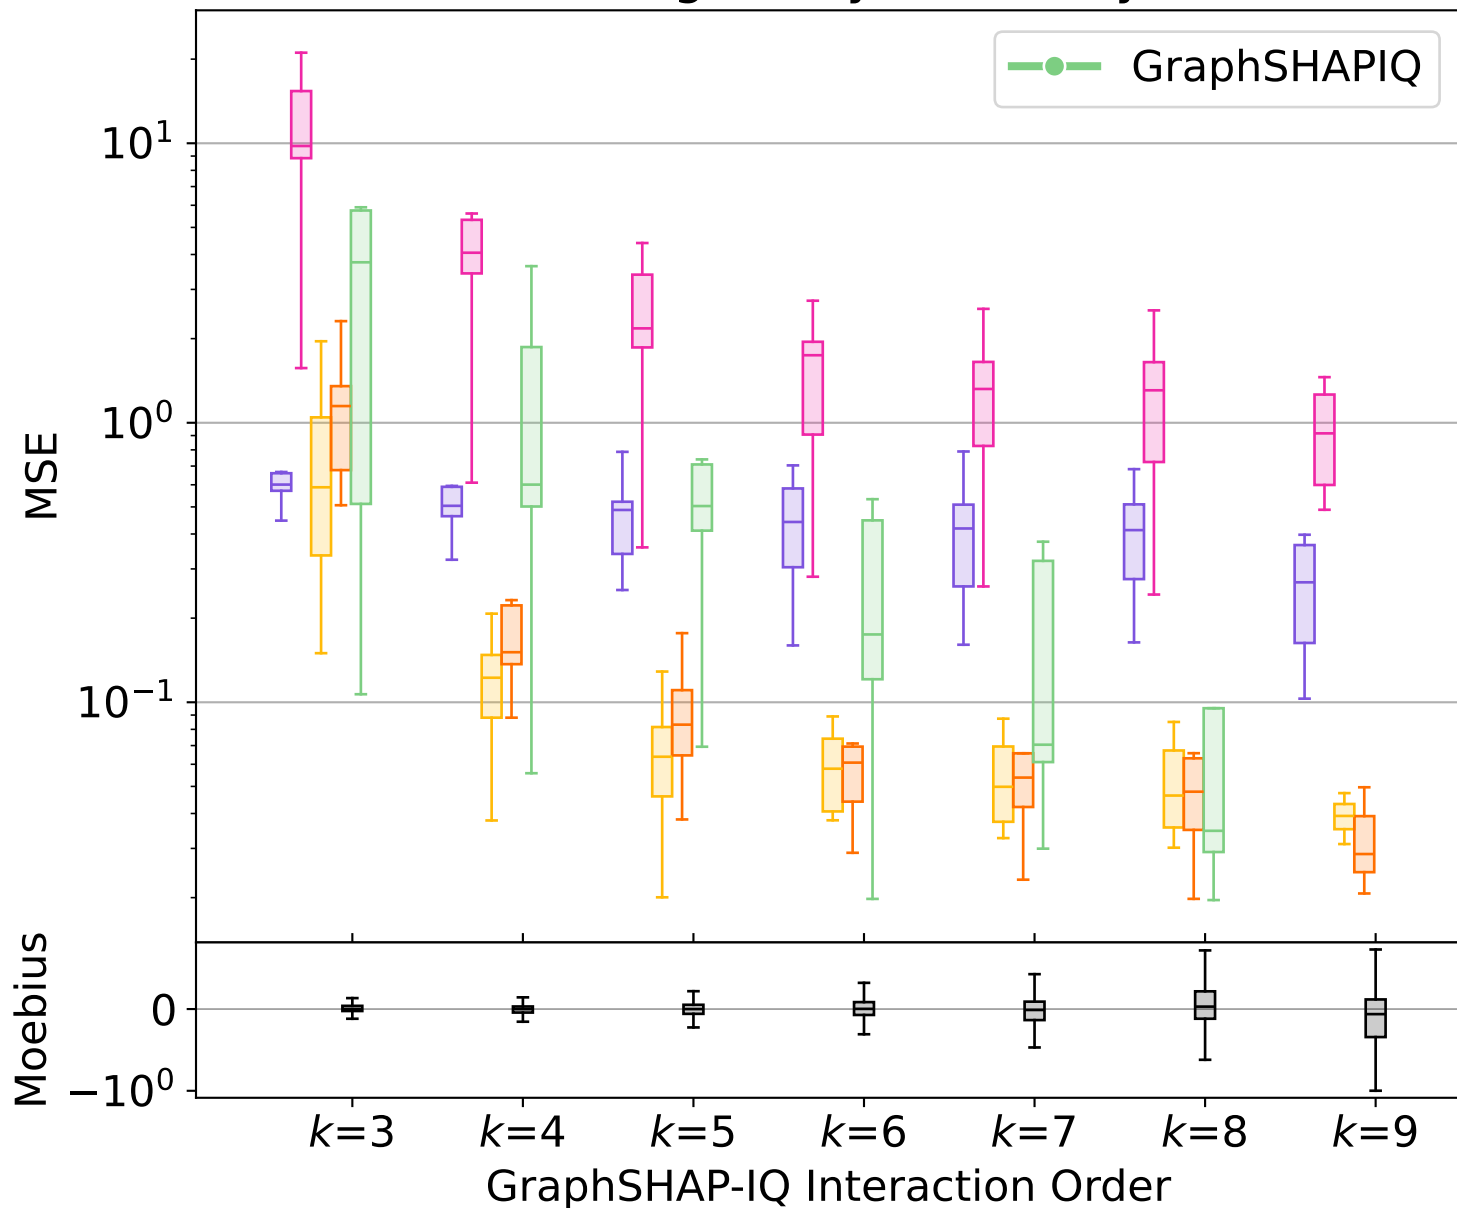

Supplement: supplementary_material [file attachment]

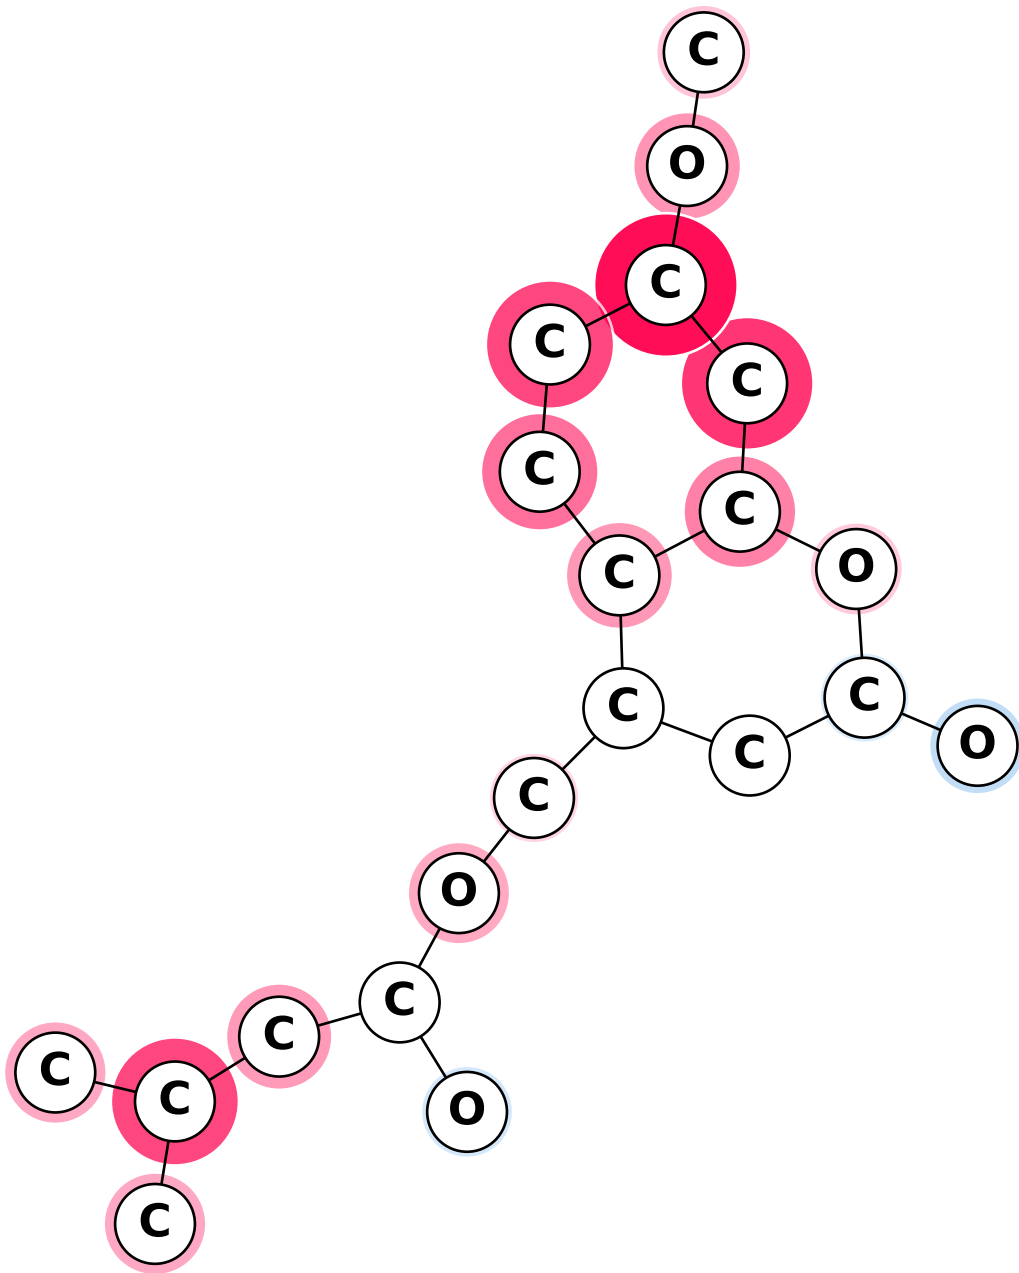

Supplement: supplementary_material [file attachment]

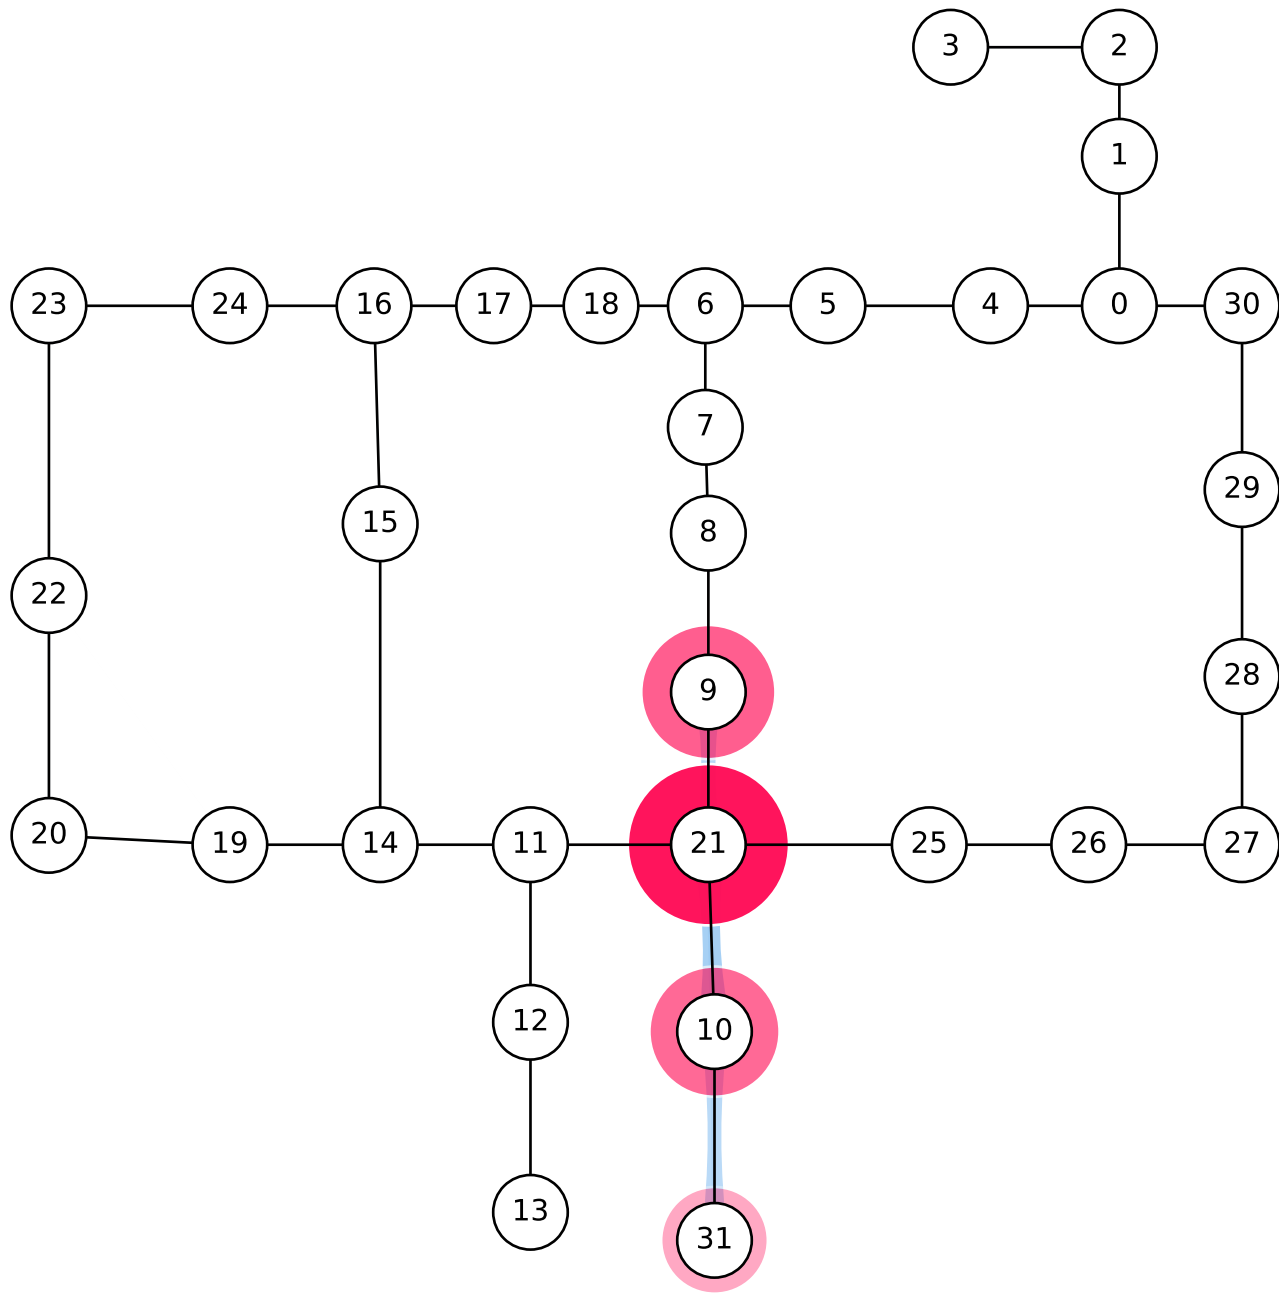

Supplement: supplementary_material [file attachment]

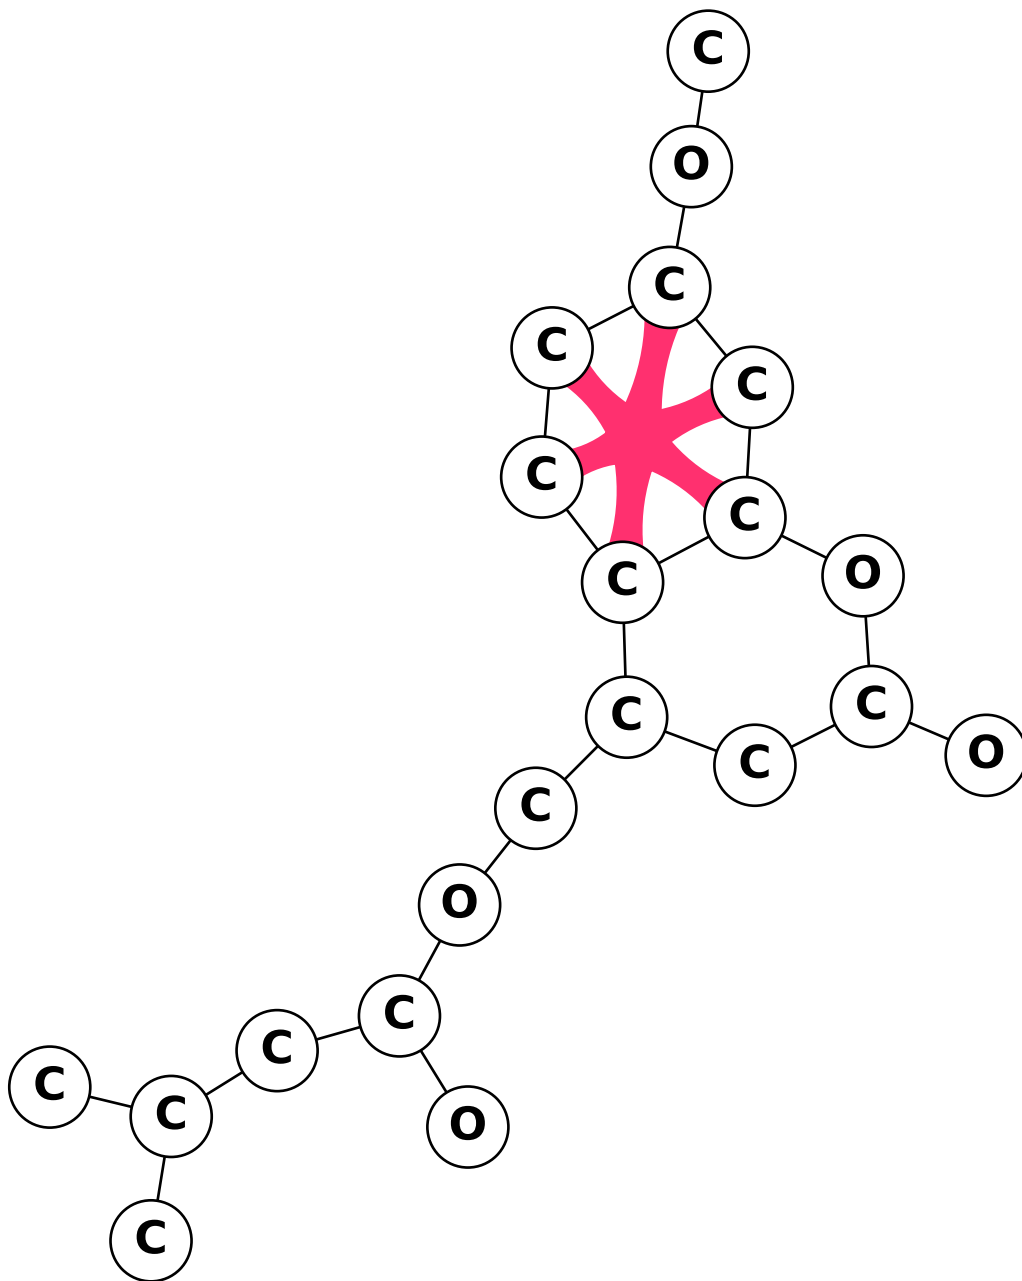

Supplement: supplementary_material [file attachment]

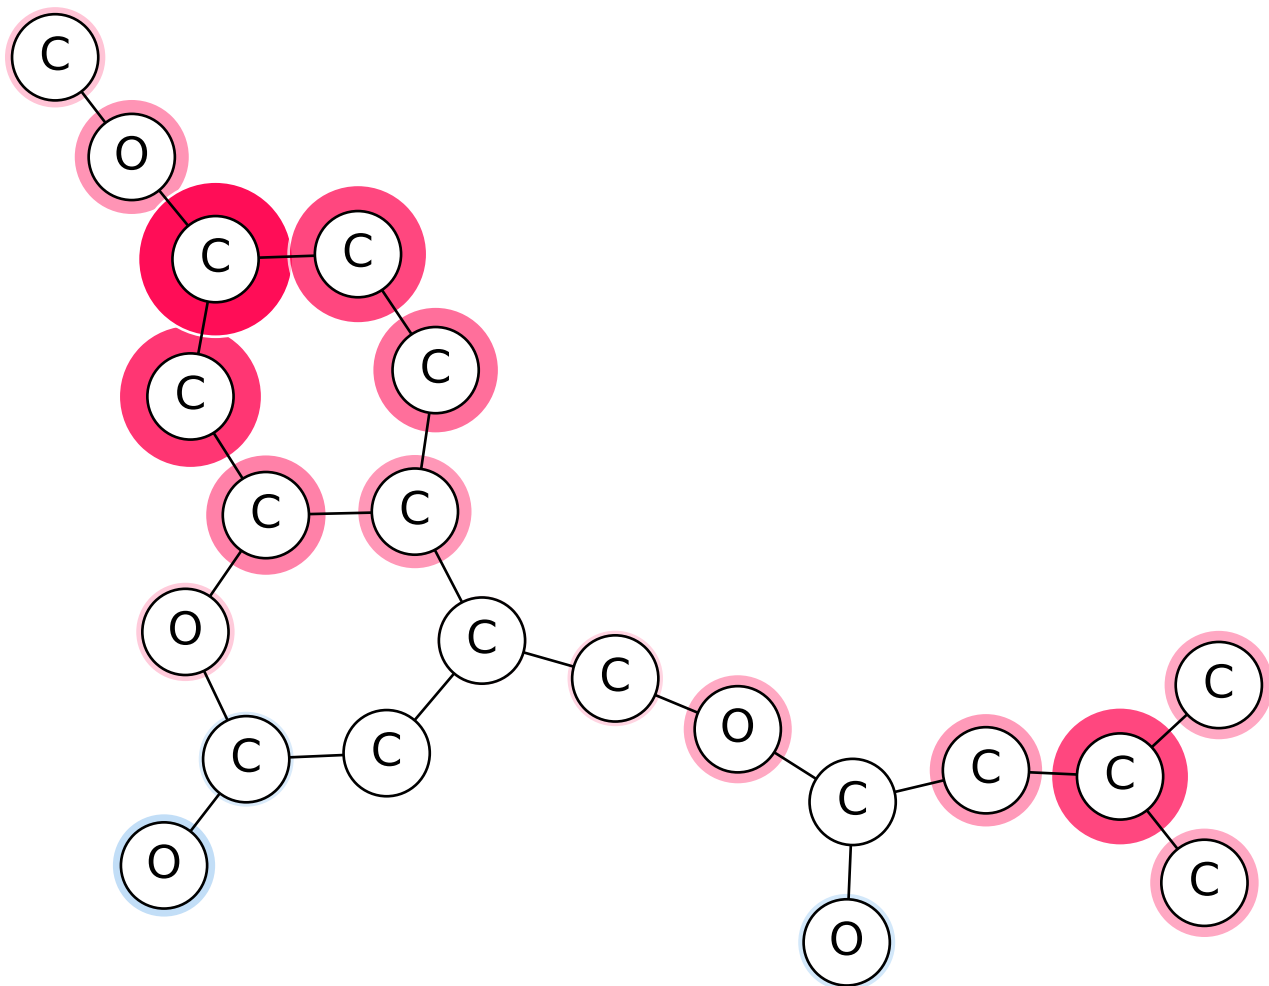

Supplement: supplementary_material [file attachment]

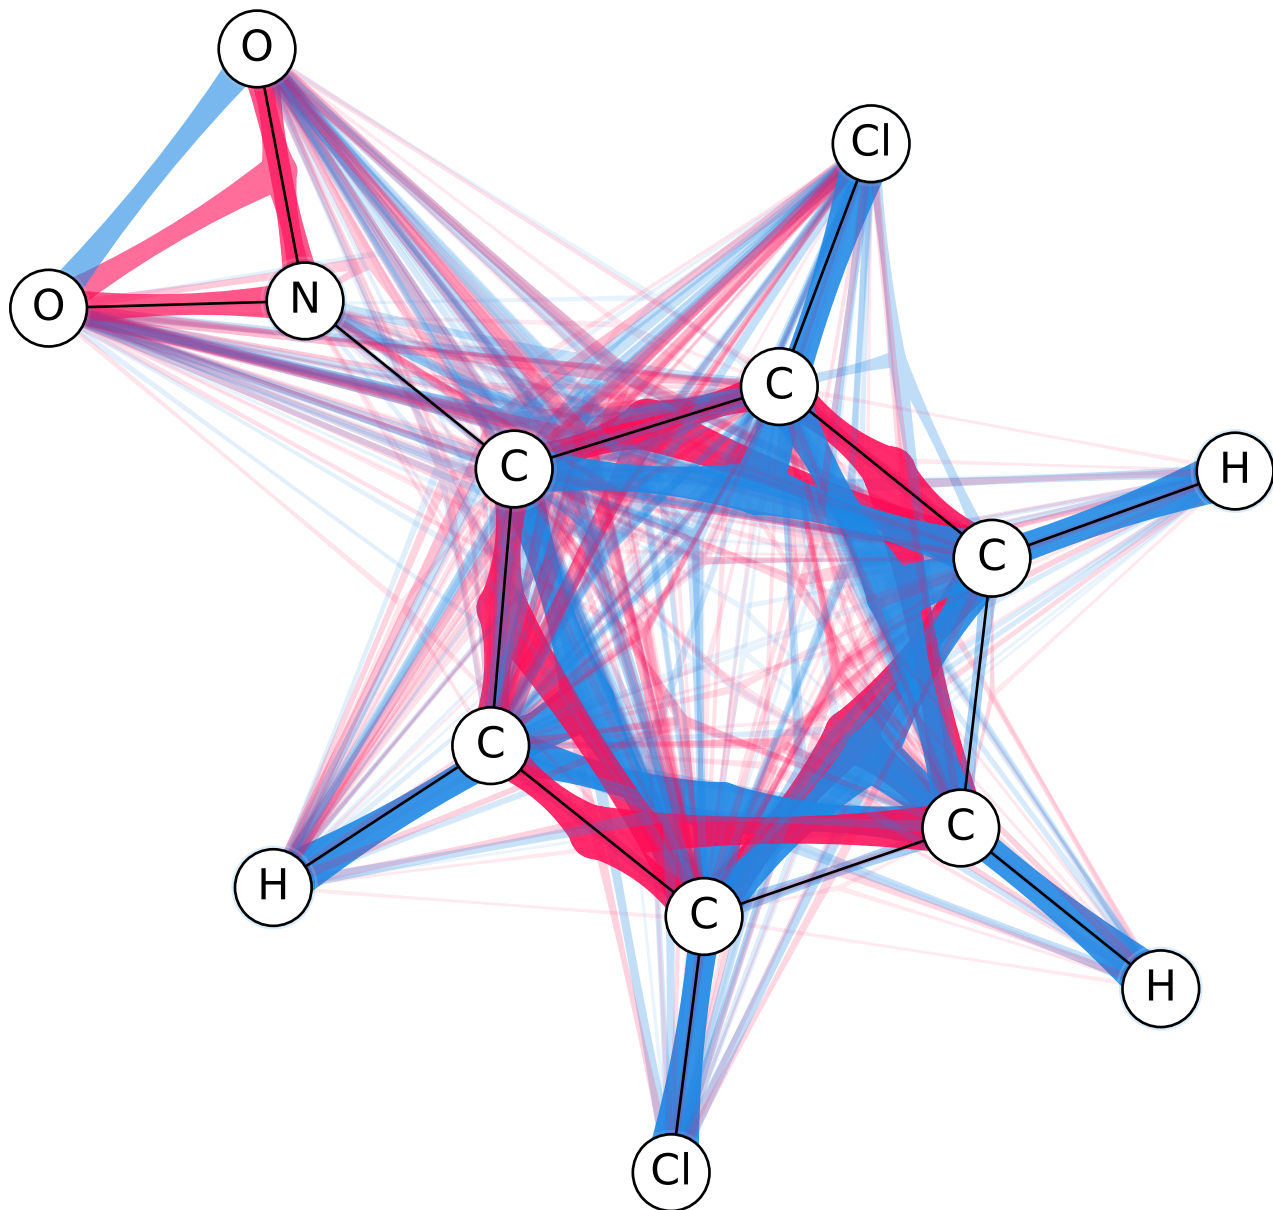

Supplement: supplementary_material [file attachment]

# SV for PROTEINS with 2-layer GCN

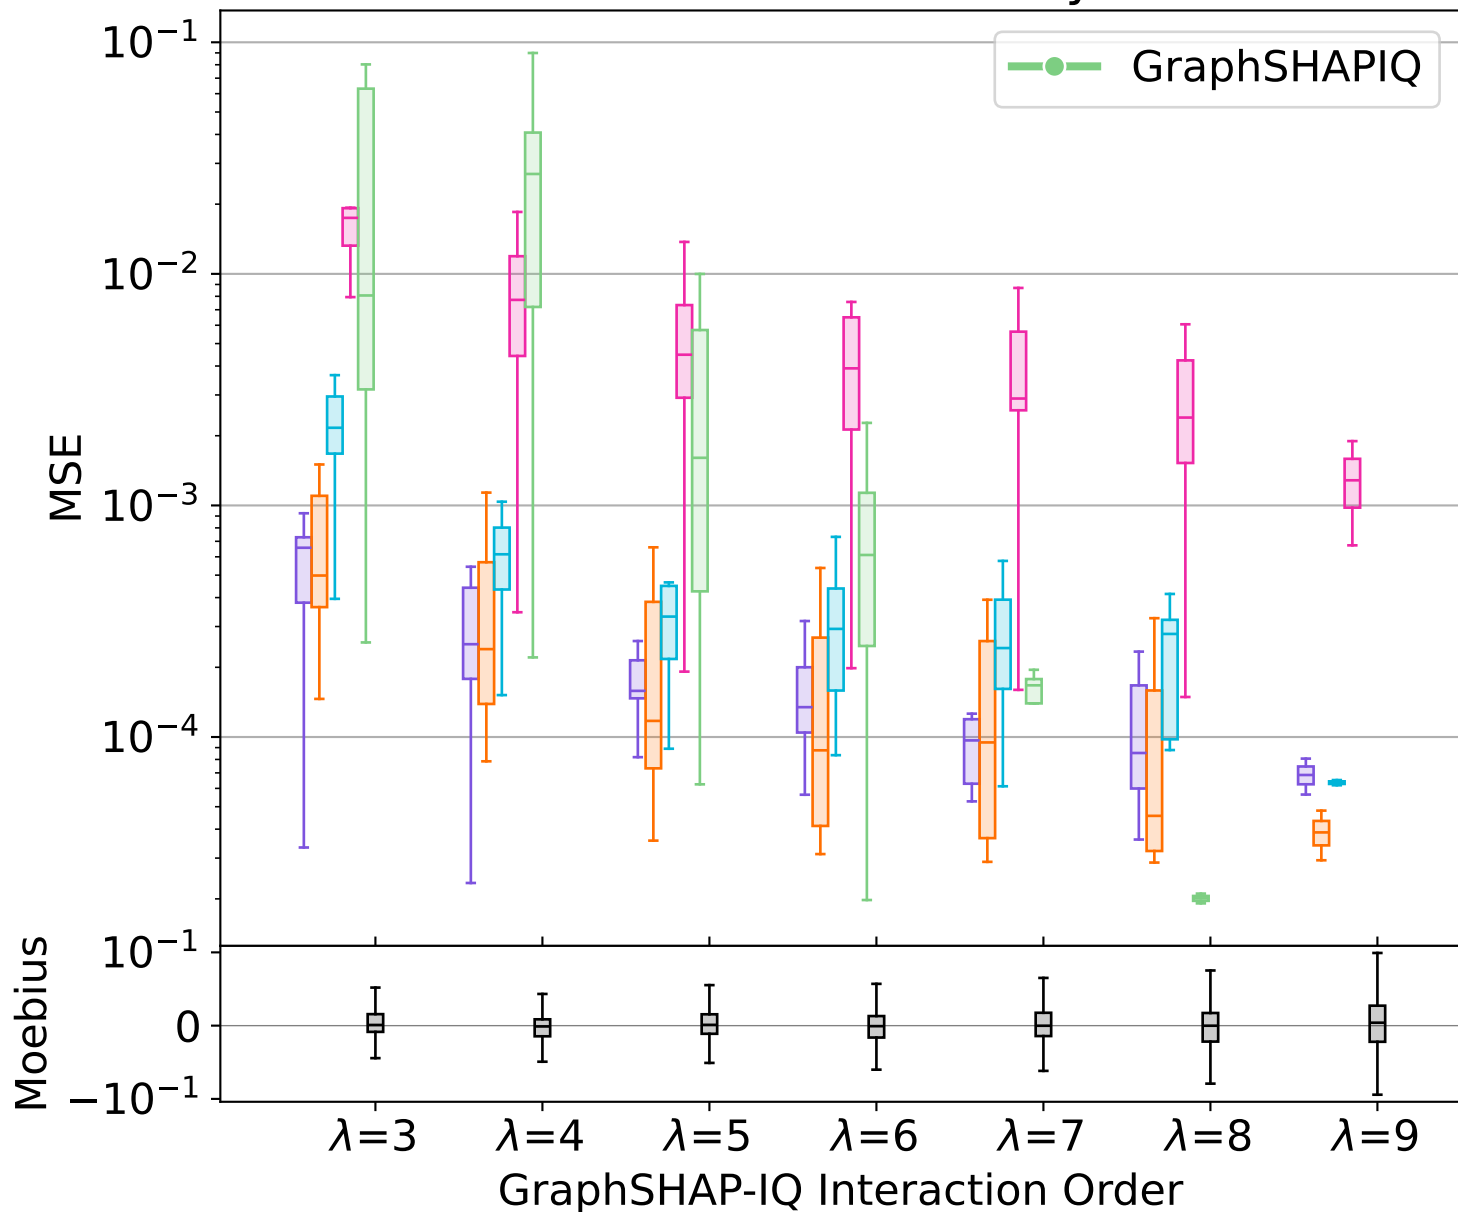

Supplement: supplementary_material [file attachment]
